# Supplementary material for: Development of Phage Cocktails to Treat E. coli Catheter-Associated Urinary Tract Infection and Associated Biofilms
Source: Front Microbiol. 2022 May 10;13:796132. doi: 10.3389/fmicb.2022.796132 (PMC9127763; doi:10.3389/fmicb.2022.796132)
Supplement: Supplementary file 2 [file Data_Sheet_1.XLSX]

## Sheet: ES12_domains
Contig	Feature	Feature Start in Contig	Feature End in Contig	Feature Direction in Contig	Domain Accession	Domain Start in Feature	Domain End in Feature	E-value	Bit Score	Domain Coverage	Domain Description
NODE_1_length_166373_cov_355.293	gene_4	1769	2185	-	PF03013.13	1	135	1.8e-46	157.3	0.992308	Pyrimidine dimer DNA glycosylase
NODE_1_length_166373_cov_355.293	gene_5	2245	2739	-	PF00959.18	24	148	7.1e-25	87.5	1	Phage lysozyme
NODE_1_length_166373_cov_355.293	gene_5	2245	2739	-	cd00442	2	104	8e-26	95	0.92	lysozyme_like domain. This contains several members including Soluble Lytic Transglycosylases (SLT), Goose Egg-White Lysozymes (GEWL), Hen Egg-White Lysozymes (HEWL), chitinases, bacteriophage lambda lysozymes, endolysins, autolysins, and chitosanases. All the members are involved in the hydrolysis of beta-1,4- linked polysaccharides.
NODE_1_length_166373_cov_355.293	gene_5	2245	2739	-	cd00735	2	162	1e-95	275	0.99	Bacteriophage T4-like lysozymes hydrolyse the beta-1,4-glycosidic bond between N-acetylmuramic acid (MurNAc) and N-acetylglucosamine (GlcNAc) in peptidoglycan heteropolymers of prokaryotic cell walls. Members include a variety of bacteriophages (T4, RB49, RB69, Aeh1) as well as Dictyostelium.
NODE_1_length_166373_cov_355.293	gene_5	2245	2739	-	cd00737	11	138	3e-12	58.8	0.76	Endolysins and autolysins are found in viruses and bacteria, respectively. The ds DNA phages of eubacteria use endolysins or muralytic enzymes in conjunction with hollin, a small membrane protein, to degrade the peptidoglycan found in bacterial cell walls. Similarly, bacteria produce autolysins to facilitate the biosynthesis of its cell wall hetropolymer peptidoglycan and cell division. Both endo…
NODE_1_length_166373_cov_355.293	gene_6	2777	3217	-	COG0494	6	126	3e-08	47.2	0.71	8-oxo-dGTP pyrophosphatase MutT and related house-cleaning NTP pyrophosphohydrolases, NUDIX family [Defense mechanisms].
NODE_1_length_166373_cov_355.293	gene_6	2777	3217	-	PF00293.27	2	130	1.9e-13	50.5	0.931298	NUDIX domain
NODE_1_length_166373_cov_355.293	gene_6	2777	3217	-	PRK10776	1	74	4e-06	41.1	0.54	nucleoside triphosphate pyrophosphohydrolase; Provisional
NODE_1_length_166373_cov_355.293	gene_6	2777	3217	-	cd02883	4	102	2e-10	52.9	0.74	Nudix hydrolase is a superfamily of enzymes found in all three kingdoms of life, and it catalyzes the hydrolysis of NUcleoside DIphosphates linked to other moieties, X. Enzymes belonging to this superfamily require a divalent cation, such as Mg2+ or Mn2+ for their activity. Members of this family are recognized by a highly conserved 23-residue nudix motif (GX5EX7REUXEEXGU, where U = I, L or V), w…
NODE_1_length_166373_cov_355.293	gene_6	2777	3217	-	cd03424	28	82	5e-06	40.9	0.37	ADP-ribose pyrophosphatase (ADPRase) catalyzes the hydrolysis of ADP-ribose and a variety of additional ADP-sugar conjugates to AMP and ribose-5-phosphate. Like other members of the Nudix hydrolase superfamily, it requires a divalent cation, such as Mg2+, for its activity. It also contains a highly conserved 23-residue Nudix motif (GX5EX7REUXEEXGU, where U = I, L or V) which functions as a metal …
NODE_1_length_166373_cov_355.293	gene_6	2777	3217	-	cd03426	26	75	3e-05	39.4	0.3	Coenzyme A pyrophosphatase (CoAse), a member of the Nudix hydrolase superfamily, functions to catalyze the elimination of oxidized inactive CoA, which can inhibit CoA-utilizing enzymes. The need of CoAses mainly arises under conditions of oxidative stress. CoAse has a conserved Nudix fold and requires a single divalent cation for catalysis. In addition to a signature Nudix motif G[X5]E[X7]REUXEEX…
NODE_1_length_166373_cov_355.293	gene_6	2777	3217	-	cd03428	33	80	1e-08	48.4	0.34	Diadenosine tetraphosphate (Ap4A) hydrolase is a member of the Nudix hydrolase superfamily. Ap4A hydrolases are well represented in a variety of prokaryotic and eukaryotic organisms. Phylogenetic analysis reveals two distinct subgroups where plant enzymes fall into one subfamily and fungi/animals/archaea enzymes, represented by this subfamily, fall into another. Bacterial enzymes are found in bot…
NODE_1_length_166373_cov_355.293	gene_6	2777	3217	-	cd03673	35	75	3e-05	38.8	0.29	Diadenosine hexaphosphate (Ap6A) hydrolase is a member of the Nudix hydrolase superfamily. Ap6A hydrolase specifically hydrolyzes diadenosine polyphosphates, but not ATP or diadenosine triphosphate, and it generates ATP as the product. Ap6A, the most preferred substrate, hydrolyzes to produce two ATP molecules, which is a novel hydrolysis mode for Ap6A. These results indicate that Ap6A hydrolase …
NODE_1_length_166373_cov_355.293	gene_6	2777	3217	-	cd04662	4	83	3e-06	41.7	0.54	Members of the Nudix hydrolase superfamily catalyze the hydrolysis of NUcleoside DIphosphates linked to other moieties, X. Enzymes belonging to this superfamily require a divalent cation, such as Mg2+ or Mn2+, for their activity and contain a highly conserved 23-residue nudix motif (GX5EX7REUXEEXGU, where U = I, L or V), which functions as a metal binding and catalytic site. Substrates of nudix h…
NODE_1_length_166373_cov_355.293	gene_6	2777	3217	-	cd04666	22	99	2e-07	44.5	0.54	Members of the Nudix hydrolase superfamily catalyze the hydrolysis of NUcleoside DIphosphates linked to other moieties, X. Enzymes belonging to this superfamily require a divalent cation, such as Mg2+ or Mn2+, for their activity and contain a highly conserved 23-residue nudix motif (GX5EX7REUXEEXGU, where U = I, L or V), which functions as a metal binding and catalytic site. Substrates of nudix h…
NODE_1_length_166373_cov_355.293	gene_6	2777	3217	-	cd04671	34	64	4e-05	38.6	0.25	Members of the Nudix hydrolase superfamily catalyze the hydrolysis of NUcleoside DIphosphates linked to other moieties, X. Enzymes belonging to this superfamily require a divalent cation, such as Mg2+ or Mn2+, for their activity and contain a highly conserved 23-residue nudix motif (GX5EX7REUXEEXGU, where U = I, L or V), which functions as a metal binding and catalytic site. Substrates of nudix h…
NODE_1_length_166373_cov_355.293	gene_6	2777	3217	-	cd04684	20	64	8e-05	37.6	0.35	Contains a crystal structure of the Nudix hydrolase from Enterococcus faecalis, which has an unknown function. In general, members of the Nudix hydrolase superfamily catalyze the hydrolysis of NUcleoside DIphosphates linked to other moieties, X. Enzymes belonging to this superfamily require a divalent cation, such as Mg2+ or Mn2+, for their activity. They also contain a highly conserved 23-residu…
NODE_1_length_166373_cov_355.293	gene_6	2777	3217	-	cd04699	6	64	2e-05	39.7	0.42	Members of the Nudix hydrolase superfamily catalyze the hydrolysis of NUcleoside DIphosphates linked to other moieties, X. Enzymes belonging to this superfamily require a divalent cation, such as Mg2+ or Mn2+, for their activity and contain a highly conserved 23-residue nudix motif (GX5EX7REUXEEXGU, where U = I, L or V), which functions as a metal binding and catalytic site. Substrates of nudix h…
NODE_1_length_166373_cov_355.293	gene_6	2777	3217	-	cd04700	5	62	5e-07	43.7	0.38	DR1025 from Deinococcus radiodurans, a member of the Nudix hydrolase superfamily, show nucleoside triphosphatase and dinucleoside polyphosphate pyrophosphatase activities. Like other enzymes belonging to this superfamily, it requires a divalent cation, in this case Mg2+, for its activity. It also contains a highly conserved 23-residue nudix motif (GX5EX7REUXEEXGU, where U = I, L or V), which func…
NODE_1_length_166373_cov_355.293	gene_17	8611	9219	-	smart00507	20	76	8e-05	34	0.97	HNH nucleases.
NODE_1_length_166373_cov_355.293	gene_27	12886	13416	-	PF06841.11	14	165	4.1e-17	62.2	0.992537	T4-like virus tail tube protein gp19
NODE_1_length_166373_cov_355.293	gene_30	14847	15437	+	PF11246.7	1	187	9.3e-91	302.5	1	Base plate wedge protein 53
NODE_1_length_166373_cov_355.293	gene_31	15421	17148	+	COG3772	184	323	4e-05	41.2	0.72	Phage-related lysozyme (muramidase), GH24 family [Cell wall/membrane/envelope biogenesis].
NODE_1_length_166373_cov_355.293	gene_31	15421	17148	+	PF06714.10	33	173	3.3e-65	218.6	1	Gp5 N-terminal OB domain
NODE_1_length_166373_cov_355.293	gene_31	15421	17148	+	cd00735	175	340	3e-106	318	1	Bacteriophage T4-like lysozymes hydrolyse the beta-1,4-glycosidic bond between N-acetylmuramic acid (MurNAc) and N-acetylglucosamine (GlcNAc) in peptidoglycan heteropolymers of prokaryotic cell walls. Members include a variety of bacteriophages (T4, RB49, RB69, Aeh1) as well as Dictyostelium.
NODE_1_length_166373_cov_355.293	gene_31	15421	17148	+	cd00737	178	304	3e-08	51.1	0.73	Endolysins and autolysins are found in viruses and bacteria, respectively. The ds DNA phages of eubacteria use endolysins or muralytic enzymes in conjunction with hollin, a small membrane protein, to degrade the peptidoglycan found in bacterial cell walls. Similarly, bacteria produce autolysins to facilitate the biosynthesis of its cell wall hetropolymer peptidoglycan and cell division. Both endo…
NODE_1_length_166373_cov_355.293	gene_33	17678	17971	+	PF05488.12	13	88	1.6e-06	28.1	0.971429	PAAR motif
NODE_1_length_166373_cov_355.293	gene_33	17678	17971	+	cd14737	2	97	4e-29	100	1	proline-alanine-alanine-arginine (PAAR) domain. This domain is found in the PAAR (proline-alanine-alanine-arginine) repeat family, where it forms a sharp conical extension on the VgrG spike, a trimeric protein complex of the bacterial type VI secretion system (T6SS). The T6SS is responsible for translocation of a wide variety of toxic effector molecules, allowing predatory cells to kill prokaryot…
NODE_1_length_166373_cov_355.293	gene_35	19959	23057	+	cd00063	8	102	3e-05	42.5	0.93	Fibronectin type 3 domain; One of three types of internal repeats found in the plasma protein fibronectin. Its tenth fibronectin type III repeat contains an RGD cell recognition sequence in a flexible loop between 2 strands. Approximately 2% of all animal proteins contain the FN3 repeat; including extracellular and intracellular proteins, membrane spanning cytokine receptors, growth hormone recep…
NODE_1_length_166373_cov_355.293	gene_37	24118	24984	+	PF07880.10	7	271	4.4e-117	390.6	0.996491	Bacteriophage T4 gp9/10-like protein
NODE_1_length_166373_cov_355.293	gene_38	24984	26789	+	PF07880.10	2	264	9.8e-101	337	0.996491	Bacteriophage T4 gp9/10-like protein
NODE_1_length_166373_cov_355.293	gene_40	27445	28995	+	COG4675	336	406	2e-08	51	0.42	Microcystin-dependent protein (function unknown) [Function unknown].
NODE_1_length_166373_cov_355.293	gene_40	27445	28995	+	PF14928.5	403	514	2.1e-39	134.5	0.941667	Short tail fibre protein receptor-binding domain
NODE_1_length_166373_cov_355.293	gene_41	29005	30462	+	PF07921.11	371	481	1e-34	118.4	0.989247	Fibritin C-terminal region
NODE_1_length_166373_cov_355.293	gene_43	31425	32195	+	PF11649.7	3	249	3.9e-135	449.5	0.928058	Virus neck protein
NODE_1_length_166373_cov_355.293	gene_44	32237	33055	+	PF16724.4	1	234	2.1e-143	476	1	T4-like virus Myoviridae tail sheath stabiliser
NODE_1_length_166373_cov_355.293	gene_45	33064	33558	+	PF11053.7	1	149	1.6e-87	291.2	1	Terminase DNA packaging enzyme
NODE_1_length_166373_cov_355.293	gene_46	33542	35374	+	PF17289.1	399	572	1.7e-44	151.5	0.987097	Terminase RNaseH-like domain
NODE_1_length_166373_cov_355.293	gene_47	35406	37385	+	COG3497	405	645	9e-08	51.6	0.6	Phage tail sheath protein FI [Mobilome: prophages, transposons].
NODE_1_length_166373_cov_355.293	gene_47	35406	37385	+	PF04984.13	348	541	1.9e-46	157.9	1	Phage tail sheath protein subtilisin-like domain
NODE_1_length_166373_cov_355.293	gene_48	37502	37993	+	PF06841.11	19	163	1.1e-16	60.9	0.985075	T4-like virus tail tube protein gp19
NODE_1_length_166373_cov_355.293	gene_49	38077	39651	+	PF07230.10	6	508	0	1044.8	1	Bacteriophage T4-like capsid assembly protein (Gp20)
NODE_1_length_166373_cov_355.293	gene_52	40321	40959	+	PF03420.12	6	190	2.1e-116	386	1	Prohead core protein serine protease
NODE_1_length_166373_cov_355.293	gene_54	41818	43383	+	PF07068.10	9	501	0	1025	1	Major capsid protein Gp23
NODE_1_length_166373_cov_355.293	gene_55	43467	44750	+	PF07068.10	150	232	4.2e-09	35.6	0.163065	Major capsid protein Gp23
NODE_1_length_166373_cov_355.293	gene_56	44780	45787	-	PF09414.9	29	228	4.3e-24	85.5	0.993789	RNA ligase
NODE_1_length_166373_cov_355.293	gene_56	44780	45787	-	TIGR02307	2	335	1.6e-122	407.1	1	RNA_lig_RNL2: RNA ligase, Rnl2 family
NODE_1_length_166373_cov_355.293	gene_58	46062	46265	-	PF11242.7	1	64	6.6e-31	106.2	1	Protein of unknown function (DUF2774)
NODE_1_length_166373_cov_355.293	gene_59	46367	47503	-	PF00801.19	108	177	1.2e-13	50.6	0.901408	PKD domain
NODE_1_length_166373_cov_355.293	gene_59	46367	47503	-	smart00089	107	175	5e-05	35.9	0.78	Repeats in polycystic kidney disease 1 (PKD1) and other proteins. Polycystic kidney disease 1 protein contains 14 repeats, present elsewhere such as in microbial collagenases.
NODE_1_length_166373_cov_355.293	gene_61	48243	48860	+	PF01541.23	2	72	8.1e-05	22.7	0.897436	GIY-YIG catalytic domain
NODE_1_length_166373_cov_355.293	gene_61	48243	48860	+	cd10437	5	64	1e-05	40.7	0.65	N-terminal catalytic domain of GIY-YIG intron endonuclease I-TevI, I-BmoI, I-BanI, I-BthII and similar proteins. I-TevI is a site-specific GIY-YIG homing endonuclease encoded within the group I intron of the thymidylate synthase gene (td) from Escherichia coli phage T4. It functions as an endonuclease that catalyzes the first step in intron homing by generating a double-strand break in the intron…
NODE_1_length_166373_cov_355.293	gene_61	48243	48860	+	cd10443	3	63	3e-06	41.9	0.67	GIY-YIG domain of uncharacterized hypothetical protein found in phycodnavirus PBCV-1 DNA virus, T. thermophila Tlr element eoncoding protein Tlr8p, and similar proteins found in bacteria. The family includes a group of diverse uncharacterized hypothetical proteins with a GIY-YIG domain that shows statistically significant similarity to the N-terminal catalytic domains of GIY-YIG family of intron-…
NODE_1_length_166373_cov_355.293	gene_61	48243	48860	+	cd10444	4	85	1e-26	97.8	0.97	N-terminal catalytic GIY-YIG domain of bacteriophage T4 segABCDEFG gene encoding proteins. The prototypes of Seg family are proteins SegA, B, C, D, E, F, and G encoded by five seg genes segA, B, C, D, E, F, and G in the bacteriophage T4 genome, respectively. SegA, B, C, D, E, F, and G are not encoded by introns, but free-standing homologs of the GIY-YIG family of endonucleases encoded by group I …
NODE_1_length_166373_cov_355.293	gene_61	48243	48860	+	cd10445	5	54	2e-06	42.6	0.55	Catalytic GIY-YIG domain of putative intron-encoded endonuclease bI1 and similar proteins. The prototype of this family is a putative intron-encoded mitochondrial DNA endonuclease bI1 found in mitochondrion Ustilago maydis. This protein may arise from proteolytic cleavage of an in-frame translation of COB exon 1 plus intron 1, containing the bI1 open reading frame. It contains an N-terminal trunc…
NODE_1_length_166373_cov_355.293	gene_61	48243	48860	+	smart00465	2	60	5e-06	37.8	0.7	GIY-YIG type nucleases (URI domain).
NODE_1_length_166373_cov_355.293	gene_62	48863	50371	+	COG1061	117	457	9e-31	121	0.75	Superfamily II DNA or RNA helicase [Transcription, Replication, recombination and repair].
NODE_1_length_166373_cov_355.293	gene_62	48863	50371	+	COG1111	112	239	2e-08	53.5	0.24	ERCC4-related helicase [Replication, recombination and repair].
NODE_1_length_166373_cov_355.293	gene_62	48863	50371	+	COG1204	117	247	9e-09	55.1	0.17	Replicative superfamily II helicase [Replication, recombination and repair].
NODE_1_length_166373_cov_355.293	gene_62	48863	50371	+	COG4096	98	456	5e-10	59	0.4	Type I site-specific restriction endonuclease, part of a restriction-modification system [Defense mechanisms].
NODE_1_length_166373_cov_355.293	gene_62	48863	50371	+	PF04851.14	127	260	2.5e-14	53.6	0.847953	Type III restriction enzyme, res subunit
NODE_1_length_166373_cov_355.293	gene_62	48863	50371	+	PRK13766	135	239	1e-06	49.1	0.13	Hef nuclease; Provisional
NODE_1_length_166373_cov_355.293	gene_62	48863	50371	+	cd00046	129	262	4e-11	59.7	0.94	DEAD-like helicases superfamily. A diverse family of proteins involved in ATP-dependent RNA or DNA unwinding. This domain contains the ATP-binding region.
NODE_1_length_166373_cov_355.293	gene_62	48863	50371	+	cd00079	330	447	4e-11	59.6	0.89	Helicase superfamily c-terminal domain; associated with DEXDc-, DEAD-, and DEAH-box proteins, yeast initiation factor 4A, Ski2p, and Hepatitis C virus NS3 helicases; this domain is found in a wide variety of helicases and helicase related proteins; may not be an autonomously folding unit, but an integral part of the helicase; 4 helicase superfamilies at present according to the organization of th…
NODE_1_length_166373_cov_355.293	gene_62	48863	50371	+	smart00487	109	280	5e-18	77.1	0.85	DEAD-like helicases superfamily.
NODE_1_length_166373_cov_355.293	gene_62	48863	50371	+	smart00490	365	443	2e-08	46.4	0.96	helicase superfamily c-terminal domain.
NODE_1_length_166373_cov_355.293	gene_63	50397	50627	+	PF11637.7	21	74	1.9e-30	104.6	1	ATP-dependant DNA helicase UvsW
NODE_1_length_166373_cov_355.293	gene_64	50683	50850	-	PF10886.7	3	55	1e-34	118.4	1	Protein of unknown function (DUF2685)
NODE_1_length_166373_cov_355.293	gene_66	51103	51516	-	PF11056.7	9	137	2.4e-50	170.1	1	Recombination, repair and ssDNA binding protein UvsY
NODE_1_length_166373_cov_355.293	gene_67	51583	51981	-	COG3628	28	100	7e-10	50.5	0.63	Phage baseplate assembly protein W [Mobilome: prophages, transposons].
NODE_1_length_166373_cov_355.293	gene_67	51583	51981	-	PF04965.13	30	116	3.3e-16	58.7	0.947368	Gene 25-like lysozyme
NODE_1_length_166373_cov_355.293	gene_68	51981	52607	-	PF12322.7	4	206	6.8e-71	237.9	1	T4 bacteriophage base plate protein
NODE_1_length_166373_cov_355.293	gene_69	52658	53407	+	PF12322.7	5	201	6.7e-65	218.3	1	T4 bacteriophage base plate protein
NODE_1_length_166373_cov_355.293	gene_71	54602	55060	+	PF11110.7	1	151	2.7e-106	351.9	0.980519	Baseplate hub distal subunit
NODE_1_length_166373_cov_355.293	gene_73	56838	57932	+	PF11091.7	5	358	2.2e-160	533.2	0.994253	Tail-tube assembly protein
NODE_1_length_166373_cov_355.293	gene_74	57932	58897	+	PF06841.11	154	247	2.3e-05	24.2	0.619403	T4-like virus tail tube protein gp19
NODE_1_length_166373_cov_355.293	gene_75	58926	59216	-	PF17602.1	1	96	1.1e-64	214.9	1	Family of unknown function (DUF5498)
NODE_1_length_166373_cov_355.293	gene_76	59277	61334	-	PF03496.13	410	617	2e-24	85.9	0.898477	ADP-ribosyltransferase exoenzyme
NODE_1_length_166373_cov_355.293	gene_76	59277	61334	-	cd00233	417	622	7e-15	72.4	0.78	VIP2; A family of actin-ADP-ribosylating toxin. A member of the Bacillus-prodiced vegetative insecticidal proteins (VIPs) possesses high specificity against the major insect pest, corn rootworms, and belongs to a classs of binary toxins and regulators of biological pathways distinct from classical A-B toxins. A novel family of insecticidal ADP-ribosyltransferses were isolated from Bacillus cereus…
NODE_1_length_166373_cov_355.293	gene_77	61338	63392	-	PF03496.13	374	615	1.1e-56	191.3	1	ADP-ribosyltransferase exoenzyme
NODE_1_length_166373_cov_355.293	gene_77	61338	63392	-	cd00233	381	612	2e-48	167	0.92	VIP2; A family of actin-ADP-ribosylating toxin. A member of the Bacillus-prodiced vegetative insecticidal proteins (VIPs) possesses high specificity against the major insect pest, corn rootworms, and belongs to a classs of binary toxins and regulators of biological pathways distinct from classical A-B toxins. A novel family of insecticidal ADP-ribosyltransferses were isolated from Bacillus cereus…
NODE_1_length_166373_cov_355.293	gene_79	63630	65093	-	COG1793	134	480	3e-17	80.9	0.66	ATP-dependent DNA ligase [Replication, recombination and repair].
NODE_1_length_166373_cov_355.293	gene_79	63630	65093	-	PF01068.20	135	367	3.2e-44	150.9	1	ATP dependent DNA ligase domain
NODE_1_length_166373_cov_355.293	gene_79	63630	65093	-	PRK01109	124	411	2e-06	48	0.41	ATP-dependent DNA ligase; Provisional
NODE_1_length_166373_cov_355.293	gene_79	63630	65093	-	PRK09125	277	412	1e-06	47.9	0.45	DNA ligase; Provisional
NODE_1_length_166373_cov_355.293	gene_79	63630	65093	-	cd07896	136	367	2e-09	54.5	0.97	Adenylation domain of kDNA ligases and similar proteins. The mitochondrial DNA of parasitic protozoans is highly unusual. It is termed the kinetoplast DNA (kDNA) and consists of circular DNA molecules (maxicircles) and several thousand smaller circular molecules (minicircles). This group is composed of kDNA ligase, Chlorella virus DNA ligase, and similar proteins. kDNA ligase and Chlorella virus …
NODE_1_length_166373_cov_355.293	gene_79	63630	65093	-	cd07901	298	367	6e-06	44.8	0.34	Adenylation domain of archaeal and bacterial LigB-like DNA ligases. ATP-dependent polynucleotide ligases catalyze phosphodiester bond formation using nicked nucleic acid substrates with the high energy nucleotide of ATP as a cofactor in a three step reaction mechanism. DNA ligases play a vital role in the diverse processes of DNA replication, recombination and repair. ATP-dependent ligases are pr…
NODE_1_length_166373_cov_355.293	gene_79	63630	65093	-	cd07903	136	367	6e-05	42.2	0.87	Adenylation domain of DNA Ligase IV. ATP-dependent polynucleotide ligases catalyze phosphodiester bond formation using nicked nucleic acid substrates with the high energy nucleotide of ATP as a cofactor in a three step reaction mechanism. DNA ligases play a vital role in the diverse processes of DNA replication, recombination and repair. ATP-dependent ligases are present in many organisms such as…
NODE_1_length_166373_cov_355.293	gene_86	67832	68164	-	PF06019.10	1	110	4.7e-57	191.1	1	Phage GP30.8 protein
NODE_1_length_166373_cov_355.293	gene_89	69247	69582	-	PF00166.20	8	110	3e-15	55.9	1	Chaperonin 10 Kd subunit
NODE_1_length_166373_cov_355.293	gene_89	69247	69582	-	cd00320	8	110	2e-07	43.3	0.93	Chaperonin 10 Kd subunit (cpn10 or GroES); Cpn10 cooperates with chaperonin 60 (cpn60 or GroEL), an ATPase, to assist the folding and assembly of proteins and is found in eubacterial cytosol, as well as in the matrix of mitochondria and chloroplasts. It forms heptameric rings with a dome-like structure, forming a lid to the large cavity of the tetradecameric cpn60 cylinder and thereby tightly reg…
NODE_1_length_166373_cov_355.293	gene_90	69639	69947	-	PF10902.7	13	86	4.9e-19	68.4	0.986486	WYL_2, Sm-like SH3 beta-barrel fold
NODE_1_length_166373_cov_355.293	gene_92	70184	70765	-	COG0117	24	183	2e-14	65	0.68	Pyrimidine deaminase domain of riboflavin biosynthesis protein RibD [Coenzyme transport and metabolism].
NODE_1_length_166373_cov_355.293	gene_92	70184	70765	-	COG0590	104	168	9e-15	66.2	0.43	tRNA(Arg) A34 adenosine deaminase TadA [Translation, ribosomal structure and biogenesis].
NODE_1_length_166373_cov_355.293	gene_92	70184	70765	-	COG2131	1	179	3e-41	137	0.91	Deoxycytidylate deaminase [Nucleotide transport and metabolism].
NODE_1_length_166373_cov_355.293	gene_92	70184	70765	-	PF00383.22	3	151	6.6e-38	128.6	0.970297	Cytidine and deoxycytidylate deaminase zinc-binding region
NODE_1_length_166373_cov_355.293	gene_92	70184	70765	-	PRK10786	102	148	5e-06	43.6	0.12	bifunctional diaminohydroxyphosphoribosylaminopyrimidine deaminase/5-amino-6-(5-phosphoribosylamino)uracil reductase; Provisional
NODE_1_length_166373_cov_355.293	gene_92	70184	70765	-	PRK10860	104	149	3e-05	40.6	0.25	tRNA-specific adenosine deaminase; Provisional
NODE_1_length_166373_cov_355.293	gene_92	70184	70765	-	cd00786	102	145	4e-10	52.6	0.45	Cytidine and deoxycytidylate deaminase zinc-binding region. The family contains cytidine deaminases, nucleoside deaminases, deoxycytidylate deaminases and riboflavin deaminases. Also included are the apoBec family of mRNA editing enzymes. All members are Zn dependent. The zinc ion in the active site plays a central role in the proposed catalytic mechanism, activating a water molecule to form a hy…
NODE_1_length_166373_cov_355.293	gene_92	70184	70765	-	cd01284	104	168	3e-12	59.2	0.54	Riboflavin-specific deaminase. Riboflavin biosynthesis protein RibD (Diaminohydroxyphosphoribosylaminopyrimidine deaminase) catalyzes the deamination of 2,5-diamino-6-ribosylamino-4(3H)-pyrimidinone 5'-phosphate, which is an intermediate step in the biosynthesis of riboflavin.The ribG gene of Bacillus subtilis and the ribD gene of E. coli are bifunctional and contain this deaminase domain and a r…
NODE_1_length_166373_cov_355.293	gene_92	70184	70765	-	cd01285	104	152	1e-13	62.6	0.45	Nucleoside deaminases include adenosine, guanine and cytosine deaminases. These enzymes are Zn dependent and catalyze the deamination of nucleosides. The zinc ion in the active site plays a central role in the proposed catalytic mechanism, activating a water molecule to form a hydroxide ion that performs a nucleophilic attack on the substrate. The functional enzyme is a homodimer. Cytosine deamin…
NODE_1_length_166373_cov_355.293	gene_92	70184	70765	-	cd01286	7	165	2e-54	170	0.97	Deoxycytidylate deaminase domain. Deoxycytidylate deaminase catalyzes the deamination of dCMP to dUMP, providing the nucleotide substrate for thymidylate synthase. The enzyme binds Zn++, which is required for catalytic activity. The activity of the enzyme is allosterically regulated by the ratio of dCTP to dTTP not only in eukaryotic cells but also in T-even phage-infected Escherichia coli, with …
NODE_1_length_166373_cov_355.293	gene_99	72585	73490	-	COG0241	156	224	6e-05	40	0.37	Histidinol phosphatase or a related phosphatase [Amino acid transport and metabolism].
NODE_1_length_166373_cov_355.293	gene_99	72585	73490	-	COG0563	3	130	6e-07	45.7	0.7	Adenylate kinase or related kinase [Nucleotide transport and metabolism].
NODE_1_length_166373_cov_355.293	gene_99	72585	73490	-	COG0645	3	123	2e-06	43.9	0.7	Predicted kinase [General function prediction only].
NODE_1_length_166373_cov_355.293	gene_99	72585	73490	-	COG4088	2	145	6e-05	40.6	0.52	tRNA Uridine 5-carbamoylmethylation protein Kti12 (Killer toxin insensitivity protein) [Translation, ribosomal structure and biogenesis].
NODE_1_length_166373_cov_355.293	gene_99	72585	73490	-	COG4639	2	150	2e-15	69.8	0.83	Predicted kinase [General function prediction only].
NODE_1_length_166373_cov_355.293	gene_99	72585	73490	-	PF13671.5	6	146	1.5e-20	73.8	0.965035	AAA domain
NODE_1_length_166373_cov_355.293	gene_99	72585	73490	-	cd01427	161	296	6e-07	45.5	1	Haloacid dehalogenase-like hydrolases. The haloacid dehalogenase-like (HAD) superfamily includes L-2-haloacid dehalogenase, epoxide hydrolase, phosphoserine phosphatase, phosphomannomutase, phosphoglycolate phosphatase, P-type ATPase, and many others. This superfamily includes a variety of enzymes that catalyze the cleavage of substrate C-Cl, P-C, and P-OP bonds via nucleophilic substitution path…
NODE_1_length_166373_cov_355.293	gene_99	72585	73490	-	cd07502	159	301	1e-65	204	0.94	C-terminal phosphatase domain of T4 polynucleotide kinase/phosphatase (PNKP) and related phosphatases. This family includes the C-terminal domain of the bifunctional enzyme T4 polynucleotide kinase/phosphatase, PNKP. The PNKP phosphatase domain can catalyze the hydrolytic removal of the 3'-phosphoryl of DNA, RNA and deoxynucleoside 3'-monophosphates. This family belongs to the haloacid dehalogena…
NODE_1_length_166373_cov_355.293	gene_104	74671	75174	-	PF17527.1	1	166	2.7e-95	316.6	0.994012	Phage ALP protein
NODE_1_length_166373_cov_355.293	gene_105	75239	76363	-	PF09511.9	52	246	4.3e-24	85.5	1	RNA ligase
NODE_1_length_166373_cov_355.293	gene_105	75239	76363	-	TIGR02308	2	374	6.7e-191	632.2	1	RNA_lig_T4_1: RNA ligase, T4 RnlA family
NODE_1_length_166373_cov_355.293	gene_106	76416	76826	-	PF01541.23	34	112	4.1e-06	26.9	0.769231	GIY-YIG catalytic domain
NODE_1_length_166373_cov_355.293	gene_106	76416	76826	-	cd00719	36	125	6e-06	39.3	0.98	GIY-YIG nuclease domain superfamily. The GIY-YIG nuclease domain superfamily includes a large and diverse group of proteins involved in many cellular processes, such as class I homing GIY-YIG family endonucleases, prokaryotic nucleotide excision repair proteins UvrC and Cho, type II restriction enzymes, the endonuclease/reverse transcriptase of eukaryotic retrotransposable elements, and a family …
NODE_1_length_166373_cov_355.293	gene_106	76416	76826	-	cd10434	42	71	0.0001	36.3	0.38	Catalytic GIY-YIG domain of nucleotide excision repair endonucleases UvrC, Cho, and similar proteins. UvrC is essential for nucleotide excision repair (NER). The N-terminal catalytic GIY-YIG domain of UvrC (also known as Uri domain) is responsible for the 3' incision reaction and the C-terminal half of UvrC, consisting of an UvrB-binding domain (UvrBb), EndoV-like nuclease domain and a helix-hair…
NODE_1_length_166373_cov_355.293	gene_106	76416	76826	-	cd10436	34	132	3e-30	105	0.99	Catalytic GIY-YIG domain of coliphage T4 non-specific endonuclease II, type II restriction endonuclease R.Hpy188I, and similar proteins. This family includes two different GIY-YIG enzymes, coliphage T4 non-specific endonuclease II (EndoII), and type II restriction endonuclease R.Hpy188I. They display high sequence similarity to each other, and both of them contain an extra N-terminal hairpin that…
NODE_1_length_166373_cov_355.293	gene_106	76416	76826	-	smart00465	33	135	5e-09	44.7	0.98	GIY-YIG type nucleases (URI domain).
NODE_1_length_166373_cov_355.293	gene_107	76854	78032	-	COG0208	1	382	1e-72	231	0.98	Ribonucleotide reductase beta subunit, ferritin-like domain [Nucleotide transport and metabolism].
NODE_1_length_166373_cov_355.293	gene_107	76854	78032	-	NF006576.0	3	388	4.7e-145	482.4	0.986702	PRK09101.1: ribonucleotide-diphosphate reductase subunit beta
NODE_1_length_166373_cov_355.293	gene_107	76854	78032	-	PF00268.20	33	335	3.4e-34	118.5	0.938849	Ribonucleotide reductase, small chain
NODE_1_length_166373_cov_355.293	gene_107	76854	78032	-	PRK07209	48	352	1e-09	57.3	0.72	ribonucleotide-diphosphate reductase subunit beta; Validated
NODE_1_length_166373_cov_355.293	gene_107	76854	78032	-	PRK09101	3	382	2e-180	509	0.97	ribonucleotide-diphosphate reductase subunit beta; Reviewed
NODE_1_length_166373_cov_355.293	gene_107	76854	78032	-	PRK09614	16	383	1e-24	101	0.97	ribonucleotide-diphosphate reductase subunit beta; Reviewed
NODE_1_length_166373_cov_355.293	gene_107	76854	78032	-	PRK13965	47	161	2e-06	47.1	0.34	ribonucleotide-diphosphate reductase subunit beta; Provisional
NODE_1_length_166373_cov_355.293	gene_107	76854	78032	-	PRK13967	29	161	8e-06	45.1	0.41	ribonucleotide-diphosphate reductase subunit beta; Provisional
NODE_1_length_166373_cov_355.293	gene_107	76854	78032	-	cd01049	28	355	2e-68	219	0.99	Ribonucleotide Reductase, R2/beta subunit, ferritin-like diiron-binding domain. Ribonucleotide Reductase, R2/beta subunit (RNRR2) is a member of a broad superfamily of ferritin-like diiron-carboxylate proteins. The RNR protein catalyzes the conversion of ribonucleotides to deoxyribonucleotides and is found in all eukaryotes, many prokaryotes, several viruses, and few archaea. The catalytically ac…
NODE_1_length_166373_cov_355.293	gene_108	78084	80348	-	COG0209	47	753	0	555	0.98	Ribonucleotide reductase alpha subunit [Nucleotide transport and metabolism].
NODE_1_length_166373_cov_355.293	gene_108	78084	80348	-	NF006578.0	3	752	8.8e-300	995.4	0.99343	PRK09103.1: ribonucleoside-diphosphate reductase subunit alpha
NODE_1_length_166373_cov_355.293	gene_108	78084	80348	-	PF02867.14	220	663	2.4e-114	382.7	0.837786	Ribonucleotide reductase, barrel domain
NODE_1_length_166373_cov_355.293	gene_108	78084	80348	-	PRK06406	185	671	6e-27	114	0.54	ribonucleotide-diphosphate reductase subunit alpha; Validated
NODE_1_length_166373_cov_355.293	gene_108	78084	80348	-	PRK06539	4	727	2e-83	282	0.86	ribonucleotide-diphosphate reductase subunit alpha; Validated
NODE_1_length_166373_cov_355.293	gene_108	78084	80348	-	PRK06948	391	634	5e-13	70.2	0.38	ribonucleotide reductase-like protein; Provisional
NODE_1_length_166373_cov_355.293	gene_108	78084	80348	-	PRK07088	19	751	2e-101	330	0.92	ribonucleotide-diphosphate reductase subunit alpha; Validated
NODE_1_length_166373_cov_355.293	gene_108	78084	80348	-	PRK07187	86	754	3e-47	176	0.9	ribonucleotide-diphosphate reductase subunit alpha; Validated
NODE_1_length_166373_cov_355.293	gene_108	78084	80348	-	PRK07207	4	651	1e-64	231	0.64	ribonucleotide-diphosphate reductase subunit alpha; Validated
NODE_1_length_166373_cov_355.293	gene_108	78084	80348	-	PRK07306	99	631	5e-29	121	0.72	ribonucleotide-diphosphate reductase subunit alpha; Validated
NODE_1_length_166373_cov_355.293	gene_108	78084	80348	-	PRK07632	99	631	1e-38	151	0.74	ribonucleotide-diphosphate reductase subunit alpha; Validated
NODE_1_length_166373_cov_355.293	gene_108	78084	80348	-	PRK08115	175	631	8e-19	89.1	0.51	ribonucleotide-diphosphate reductase subunit alpha; Validated
NODE_1_length_166373_cov_355.293	gene_108	78084	80348	-	PRK08188	104	754	3e-37	147	0.84	ribonucleotide-diphosphate reductase subunit alpha; Validated
NODE_1_length_166373_cov_355.293	gene_108	78084	80348	-	PRK08332	467	654	3e-18	87.9	0.11	ribonucleotide-diphosphate reductase subunit alpha; Validated
NODE_1_length_166373_cov_355.293	gene_108	78084	80348	-	PRK08447	3	727	4e-96	317	0.89	ribonucleotide-diphosphate reductase subunit alpha; Validated
NODE_1_length_166373_cov_355.293	gene_108	78084	80348	-	PRK08665	134	631	4e-26	111	0.55	ribonucleotide-diphosphate reductase subunit alpha; Validated
NODE_1_length_166373_cov_355.293	gene_108	78084	80348	-	PRK09102	132	752	2e-54	196	0.88	ribonucleotide-diphosphate reductase subunit alpha; Validated
NODE_1_length_166373_cov_355.293	gene_108	78084	80348	-	PRK09103	4	754	0	1062	0.99	ribonucleotide-diphosphate reductase subunit alpha; Validated
NODE_1_length_166373_cov_355.293	gene_108	78084	80348	-	PRK09209	4	752	1e-93	309	0.94	ribonucleotide-diphosphate reductase subunit alpha; Validated
NODE_1_length_166373_cov_355.293	gene_108	78084	80348	-	PRK12364	12	752	2e-88	297	0.83	ribonucleotide-diphosphate reductase subunit alpha; Provisional
NODE_1_length_166373_cov_355.293	gene_108	78084	80348	-	PRK12365	2	653	8e-72	252	0.61	ribonucleotide-diphosphate reductase subunit alpha; Provisional
NODE_1_length_166373_cov_355.293	gene_108	78084	80348	-	TIGR02506	143	731	2.4e-160	532.9	1	NrdE_NrdA: ribonucleoside-diphosphate reductase, alpha subunit
NODE_1_length_166373_cov_355.293	gene_108	78084	80348	-	cd00576	192	728	1e-32	129	0.93	Ribonucleotide reductase and Pyruvate formate lyase. Ribonucleotide reductase (RNR) and pyruvate formate lyase (PFL) are believed to have diverged from a common ancestor. They have a structurally similar ten-stranded alpha-beta barrel domain that hosts the active site, and are radical enzymes. RNRs are found in all organisms and provide the only mechanism by which nucleotides are converted to deo…
NODE_1_length_166373_cov_355.293	gene_108	78084	80348	-	cd01679	167	730	6e-141	424	0.99	Class I ribonucleotide reductase. Ribonucleotide reductase (RNR) catalyzes the reductive synthesis of deoxyribonucleotides from their corresponding ribonucleotides. It provides the precursors necessary for DNA synthesis. RNRs are separated into three classes based on their metallocofactor usage. Class I RNRs, found in eukaryotes, bacteria, and many viruses, use a diiron-tyrosyl radical. Class II …
NODE_1_length_166373_cov_355.293	gene_108	78084	80348	-	cd02888	192	637	5e-49	178	0.86	Class II ribonucleotide reductase, dimeric form. Ribonucleotide reductase (RNR) catalyzes the reductive synthesis of deoxyribonucleotides from their corresponding ribonucleotides. It provides the precursors necessary for DNA synthesis. RNRs are separated into three classes based on their metallocofactor usage. Class I RNRs, found in eukaryotes, bacteria, and bacteriophage, use a diiron-tyrosyl ra…
NODE_1_length_166373_cov_355.293	gene_110	80879	81739	-	COG0207	1	286	9e-108	315	0.97	Thymidylate synthase [Nucleotide transport and metabolism].
NODE_1_length_166373_cov_355.293	gene_110	80879	81739	-	PF00303.18	2	286	5.5e-98	327.3	1	Thymidylate synthase
NODE_1_length_166373_cov_355.293	gene_110	80879	81739	-	PRK00956	109	231	9e-14	66.5	0.6	thymidylate synthase; Provisional
NODE_1_length_166373_cov_355.293	gene_110	80879	81739	-	PRK01827	1	286	8e-125	359	0.99	thymidylate synthase; Reviewed
NODE_1_length_166373_cov_355.293	gene_110	80879	81739	-	PRK13821	1	286	6e-70	220	0.85	thymidylate synthase; Provisional
NODE_1_length_166373_cov_355.293	gene_110	80879	81739	-	TIGR03284	2	286	9.3e-88	292.2	1	thym_sym: thymidylate synthase
NODE_1_length_166373_cov_355.293	gene_110	80879	81739	-	cd00351	3	227	1e-93	277	0.98	Thymidylate synthase and pyrimidine hydroxymethylase: Thymidylate synthase (TS) and deoxycytidylate hydroxymethylase (dCMP-HMase) are homologs that catalyze analogous alkylation of C5 of pyrimidine nucleotides. Both enzymes are involved in the biosynthesis of DNA precursors and are active as homodimers. However, they exhibit distinct pyrimidine base specificities and differ in the details of thei…
NODE_1_length_166373_cov_355.293	gene_112	82153	82737	-	COG0262	1	149	1e-12	60.4	0.72	Dihydrofolate reductase [Coenzyme transport and metabolism].
NODE_1_length_166373_cov_355.293	gene_112	82153	82737	-	PF00186.18	22	158	5e-17	62	0.708075	Dihydrofolate reductase
NODE_1_length_166373_cov_355.293	gene_112	82153	82737	-	PRK10769	23	149	4e-06	42.8	0.64	dihydrofolate reductase; Provisional
NODE_1_length_166373_cov_355.293	gene_112	82153	82737	-	cd00209	2	194	3e-18	76.8	0.95	Dihydrofolate reductase (DHFR). Reduces 7,8-dihydrofolate to 5,6,7,8-tetrahydrofolate with NADPH as a cofactor. This is an essential step in the biosynthesis of deoxythymidine phosphate since 5,6,7,8-tetrahydrofolate is required to regenerate 5,10-methylenetetrahydrofolate which is then utilized by thymidylate synthase. Inhibition of DHFR interrupts thymidilate synthesis and DNA replication, inhi…
NODE_1_length_166373_cov_355.293	gene_116	83784	84011	-	PF05798.10	1	75	1.7e-55	185.1	1	Bacteriophage FRD3 protein
NODE_1_length_166373_cov_355.293	gene_117	84156	85061	-	PF08804.9	28	116	8.6e-52	173.2	1	gp32 DNA binding protein like
NODE_1_length_166373_cov_355.293	gene_118	85121	85753	-	cd10444	3	97	2e-18	75.9	0.97	N-terminal catalytic GIY-YIG domain of bacteriophage T4 segABCDEFG gene encoding proteins. The prototypes of Seg family are proteins SegA, B, C, D, E, F, and G encoded by five seg genes segA, B, C, D, E, F, and G in the bacteriophage T4 genome, respectively. SegA, B, C, D, E, F, and G are not encoded by introns, but free-standing homologs of the GIY-YIG family of endonucleases encoded by group I …
NODE_1_length_166373_cov_355.293	gene_119	85755	86393	-	PF08994.9	108	211	8.2e-55	183.7	1	T4 gene Gp59 loader of gp41 DNA helicase C-term
NODE_1_length_166373_cov_355.293	gene_120	86405	86743	-	PF16805.4	38	108	5.5e-28	96.8	0.985507	Phage late-transcription coactivator
NODE_1_length_166373_cov_355.293	gene_121	86721	86990	-	PF11126.7	22	88	3.7e-41	139.1	1	Transcriptional regulator DsbA
NODE_1_length_166373_cov_355.293	gene_122	86999	87916	-	COG0258	63	206	3e-06	45	0.43	5'-3' exonuclease [Replication, recombination and repair].
NODE_1_length_166373_cov_355.293	gene_122	86999	87916	-	PF09293.9	183	305	8.3e-70	232.8	1	T4 RNase H, C terminal
NODE_1_length_166373_cov_355.293	gene_122	86999	87916	-	PRK05755	113	240	4e-09	55.5	0.14	DNA polymerase I; Provisional
NODE_1_length_166373_cov_355.293	gene_122	86999	87916	-	PRK09482	71	180	2e-08	51.8	0.36	flap endonuclease-like protein; Provisional
NODE_1_length_166373_cov_355.293	gene_122	86999	87916	-	cd00008	15	180	5e-75	229	1	PIN domains of the 5'-3' exonucleases of DNA polymerase I, bacteriophage T4 RNase H and T5-5' nucleases, and homologs. PIN (PilT N terminus) domains of the 5'-3' exonucleases (53EXO) of mutli-domain DNA polymerase I and single domain protein homologs, as well as, the PIN domains of bacteriophage T5-5'nuclease (T5FEN or 5'-3'exonuclease), bacteriophage T4 RNase H (T4FEN), bacteriophage T3 (T3 phag…
NODE_1_length_166373_cov_355.293	gene_122	86999	87916	-	cd09852	43	171	1e-11	59.1	0.93	PIN (PilT N terminus) domain: Superfamily. PIN_SF The PIN (PilT N terminus) domain belongs to a large nuclease superfamily with representatives from eukaryota, eubacteria, and archaea. PIN domains were originally named for their sequence similarity to the N-terminal domain of an annotated pili biogenesis protein, PilT, a domain fusion between a PIN-domain and a PilT ATPase domain. The structural …
NODE_1_length_166373_cov_355.293	gene_122	86999	87916	-	cd09853	15	179	1e-66	207	0.98	PIN domains of structure-specific 5' nucleases (or flap endonuclease-1-like) involved in DNA replication, repair, and recombination. Structure-specific 5' nucleases are capable of both 5'-3' exonucleolytic activity and cleaving bifurcated or branched DNA, in an endonucleolytic, structure-specific manner. The family includes the PIN (PilT N terminus) domains of Flap Endonuclease-1 (FEN1), Exonucle…
NODE_1_length_166373_cov_355.293	gene_122	86999	87916	-	cd09859	59	176	6e-11	58.2	0.57	PIN domain of the 5'-3' exonuclease of Taq DNA polymerase I and homologs. The 5'-3' exonuclease (53EXO) PIN (PilT N terminus) domain of multi-domain DNA polymerase I and single domain protein homologs are included in this family. Taq contains a polymerase domain for synthesizing a new DNA strand and a 53EXO PIN domain for cleaving RNA primers or damaged DNA strands. Taq's 53EXO PIN domain recogni…
NODE_1_length_166373_cov_355.293	gene_122	86999	87916	-	cd09860	14	181	1e-68	212	0.95	PIN domain of bacteriophage T3, T4 RNase H, T5-5'nuclease, and homologs. PIN (PilT N terminus) domain of bacteriophage T5-5'nuclease (5'-3' exonuclease or T5FEN), bacteriophage T4 RNase H (T4FEN), bacteriophage T3 (T3 phage exodeoxyribonuclease) and other similar 5' nucleases are included in this family. T5-5'nuclease is a 5'-3'exodeoxyribonuclease that also exhibits endonucleolytic activity on f…
NODE_1_length_166373_cov_355.293	gene_122	86999	87916	-	cd09899	184	259	5e-12	59.4	0.84	H3TH domain of bacteriophage T3, T4 RNase H, T5-5' nucleases, and homologs. H3TH (helix-3-turn-helix) domains of bacteriophage T5-5'nuclease (5'-3' exonuclease or T5FEN), bacteriophage T4 RNase H (T4FEN), bacteriophage T3 (T3 phage exodeoxyribonuclease) and other similar 5' nucleases are included in this family. The T5-5'nuclease is a 5'-3' exodeoxyribonuclease that also exhibits endonucleolytic …
NODE_1_length_166373_cov_355.293	gene_122	86999	87916	-	smart00279	185	220	7e-08	43.6	1	Helix-hairpin-helix class 2 (Pol1 family) motifs.
NODE_1_length_166373_cov_355.293	gene_122	86999	87916	-	smart00475	58	206	2e-14	66.1	0.5	5'-3' exonuclease.
NODE_1_length_166373_cov_355.293	gene_126	93077	93727	+	PF03903.12	1	216	5.1e-87	291	1	Phage T4 tail fibre
NODE_1_length_166373_cov_355.293	gene_127	93736	96702	+	PF13884.5	876	932	4.7e-09	36.3	1	Chaperone of endosialidase
NODE_1_length_166373_cov_355.293	gene_128	96735	97535	+	PF05268.10	1	266	4e-123	410.1	1	Phage tail fibre adhesin Gp38
NODE_1_length_166373_cov_355.293	gene_130	98224	98496	-	PF09010.9	2	81	2.2e-42	142.9	1	Anti-Sigma Factor A
NODE_1_length_166373_cov_355.293	gene_140	101569	102897	-	COG0188	3	382	3e-55	194	0.45	DNA gyrase/topoisomerase IV, subunit A [Replication, recombination and repair].
NODE_1_length_166373_cov_355.293	gene_140	101569	102897	-	PF00521.19	27	429	4e-78	263.1	0.971831	DNA gyrase/topoisomerase IV, subunit A
NODE_1_length_166373_cov_355.293	gene_140	101569	102897	-	PRK05560	17	236	3e-21	94.7	0.25	DNA gyrase subunit A; Validated
NODE_1_length_166373_cov_355.293	gene_140	101569	102897	-	PRK05561	5	236	1e-33	132	0.29	DNA topoisomerase IV subunit A; Validated
NODE_1_length_166373_cov_355.293	gene_140	101569	102897	-	PRK09630	6	247	6e-23	98.8	0.48	DNA topoisomerase IV subunit A; Provisional
NODE_1_length_166373_cov_355.293	gene_140	101569	102897	-	PRK09631	7	247	9e-31	122	0.36	DNA topoisomerase IV subunit A; Provisional
NODE_1_length_166373_cov_355.293	gene_140	101569	102897	-	PRK12758	17	257	2e-21	95.5	0.26	DNA topoisomerase IV subunit A; Provisional
NODE_1_length_166373_cov_355.293	gene_140	101569	102897	-	PRK13979	17	195	1e-21	95.6	0.18	DNA topoisomerase IV subunit A; Provisional
NODE_1_length_166373_cov_355.293	gene_140	101569	102897	-	cd00187	27	405	8e-66	218	0.8	DNA Topoisomerase, subtype IIA; domain A'; bacterial DNA topoisomerase IV (C subunit, ParC), bacterial DNA gyrases (A subunit, GyrA),mammalian DNA toposiomerases II. DNA topoisomerases are essential enzymes that regulate the conformational changes in DNA topology by catalysing the concerted breakage and rejoining of DNA strands during normal cellular growth.
NODE_1_length_166373_cov_355.293	gene_140	101569	102897	-	smart00434	6	442	2e-142	413	0.98	DNA Topoisomerase IV. Bacterial DNA topoisomerase IV, GyrA, ParC
NODE_1_length_166373_cov_355.293	gene_141	103281	103739	-	PF06591.10	1	152	5.7e-96	318.3	1	T4-like phage nuclear disruption protein (Ndd)
NODE_1_length_166373_cov_355.293	gene_152	109293	111110	-	COG0187	6	603	2e-94	303	0.87	DNA gyrase/topoisomerase IV, subunit B [Replication, recombination and repair].
NODE_1_length_166373_cov_355.293	gene_152	109293	111110	-	PF02518.25	46	188	7.5e-14	52.1	0.945946	Histidine kinase-, DNA gyrase B-, and HSP90-like ATPase
NODE_1_length_166373_cov_355.293	gene_152	109293	111110	-	PRK05559	6	603	7e-79	262	0.85	DNA topoisomerase IV subunit B; Reviewed
NODE_1_length_166373_cov_355.293	gene_152	109293	111110	-	PRK05644	4	601	1e-53	193	0.8	DNA gyrase subunit B; Validated
NODE_1_length_166373_cov_355.293	gene_152	109293	111110	-	PRK14939	6	532	1e-39	152	0.6	DNA gyrase subunit B; Provisional
NODE_1_length_166373_cov_355.293	gene_152	109293	111110	-	cd00075	48	185	2e-07	48.4	0.95	Histidine kinase-like ATPases; This family includes several ATP-binding proteins for example: histidine kinase, DNA gyrase B, topoisomerases, heat shock protein HSP90, phytochrome-like ATPases and DNA mismatch repair proteins
NODE_1_length_166373_cov_355.293	gene_152	109293	111110	-	cd00822	265	374	3e-10	57.6	0.59	TopoIIA_Trans_DNA_gyrase: Transducer domain, having a ribosomal S5 domain 2-like fold, of the type found in proteins of the type IIA family of DNA topoisomerases similar to the B subunits of E. coli DNA gyrase and E. coli Topoisomerase IV which are heterodimers composed of two subunits. The type IIA enzymes are the predominant form of topoisomerase and are found in some bacteriophages, viruses an…
NODE_1_length_166373_cov_355.293	gene_152	109293	111110	-	cd01030	409	515	6e-30	113	0.93	TOPRIM_TopoIIA_like: topoisomerase-primase (TOPRIM) nucleotidyl transferase/hydrolase domain of the type found in proteins of the type IIA family of DNA topoisomerases similar to Saccharomyces cerevisiae Topoisomerase II. TopoIIA enzymes cut both strands of the duplex DNA to remove (relax) both positive and negative supercoils in DNA. These enzymes covalently attach to the 5' ends of the cut DNA,…
NODE_1_length_166373_cov_355.293	gene_152	109293	111110	-	cd03365	410	510	9e-19	82	0.84	TOPRIM_TopoIIA: topoisomerase-primase (TOPRIM) nucleotidyl transferase/hydrolase domain of the type found in proteins of the type IIA family of DNA topoisomerases similar to Saccharomyces cerevisiae Topoisomerase II. TopoIIA enzymes cut both strands of the duplex DNA to remove (relax) both positive and negative supercoils in DNA. These enzymes covalently attach to the 5' ends of the cut DNA, sepa…
NODE_1_length_166373_cov_355.293	gene_152	109293	111110	-	cd03366	411	521	1e-18	81.5	0.96	TOPRIM_TopoIIA_GyrB: topoisomerase-primase (TOPRIM) nucleotidyl transferase/hydrolase domain of the type found in proteins of the type IIA family of DNA topoisomerases similar to the Escherichia coli GyrB subunit. TopoIIA enzymes cut both strands of the duplex DNA to remove (relax) both positive and negative supercoils in DNA. These enzymes covalently attach to the 5' ends of the cut DNA, separat…
NODE_1_length_166373_cov_355.293	gene_152	109293	111110	-	cd03481	230	339	2e-20	88.1	0.72	TopoIIA_Trans_ScTopoIIA: Transducer domain, having a ribosomal S5 domain 2-like fold, of the type found in proteins of the type IIA family of DNA topoisomerases similar to Saccharomyces cerevisiae Topo IIA. S. cerevisiae Topo IIA is a homodimer encoded by a single gene. The type IIA enzymes are the predominant form of topoisomerase and are found in some bacteriophages, viruses and archaea, and in…
NODE_1_length_166373_cov_355.293	gene_152	109293	111110	-	smart00387	47	189	2e-08	47.3	0.9	Histidine kinase-like ATPases. Histidine kinase-, DNA gyrase B-, phytochrome-like ATPases.
NODE_1_length_166373_cov_355.293	gene_152	109293	111110	-	smart00433	47	605	8e-101	316	0.91	TopoisomeraseII. Eukaryotic DNA topoisomerase II, GyrB, ParE
NODE_1_length_166373_cov_355.293	gene_155	111820	111996	-	COG2331	1	53	2e-05	35.6	0.63	Predicted nucleic acid-binding protein, contains Zn-ribbon domain [General function prediction only].
NODE_1_length_166373_cov_355.293	gene_155	111820	111996	-	PF09723.9	1	38	9.9e-12	44.7	0.875	Zinc ribbon domain
NODE_1_length_166373_cov_355.293	gene_155	111820	111996	-	TIGR02605	1	45	8.6e-12	42.9	0.846154	CxxC_CxxC_SSSS: putative regulatory protein, FmdB family
NODE_1_length_166373_cov_355.293	gene_155	111820	111996	-	smart00834	1	43	2e-12	51.4	1	Putative regulatory protein. CxxC_CXXC_SSSS represents a region of about 41 amino acids found in a number of small proteins in a wide range of bacteria. The region usually begins with the initiator Met and contains two CxxC motifs separated by 17 amino acids. One protein in this entry has been noted as a putative regulatory protein, designated FmdB. Most proteins in this entry have a C-terminal r…
NODE_1_length_166373_cov_355.293	gene_161	114406	115089	-	PF16473.4	4	164	1.1e-19	70.9	0.76506	3' exoribonuclease, RNase T-like
NODE_1_length_166373_cov_355.293	gene_161	114406	115089	-	cd06127	5	192	2e-05	41.5	0.92	DEDDh 3'-5' exonuclease domain family. DEDDh exonucleases, part of the DnaQ-like (or DEDD) exonuclease superfamily, catalyze the excision of nucleoside monophosphates at the DNA or RNA termini in the 3'-5' direction. These proteins contain four invariant acidic residues in three conserved sequence motifs termed ExoI, ExoII and ExoIII. DEDDh exonucleases are classified as such because of the prese…
NODE_1_length_166373_cov_355.293	gene_165	115823	117142	-	COG0507	32	436	4e-19	87.2	0.46	ATP-dependent exoDNAse (exonuclease V), alpha subunit, helicase superfamily I [Replication, recombination and repair].
NODE_1_length_166373_cov_355.293	gene_165	115823	117142	-	PF13604.5	6	194	8e-26	90.8	0.895833	AAA domain
NODE_1_length_166373_cov_355.293	gene_165	115823	117142	-	PRK10875	30	153	3e-08	53.4	0.18	exonuclease V subunit alpha; Provisional
NODE_1_length_166373_cov_355.293	gene_165	115823	117142	-	PRK13709	5	153	3e-06	47.5	0.08	conjugal transfer nickase/helicase TraI; Provisional
NODE_1_length_166373_cov_355.293	gene_165	115823	117142	-	smart00382	24	129	2e-07	43.9	0.67	ATPases associated with a variety of cellular activities. AAA - ATPases associated with a variety of cellular activities. This profile/alignment only detects a fraction of this vast family. The poorly conserved N-terminal helix is missing from the alignment.
NODE_1_length_166373_cov_355.293	gene_165	115823	117142	-	smart00487	1	140	4e-07	44.4	0.68	DEAD-like helicases superfamily.
NODE_1_length_166373_cov_355.293	gene_180	122424	122942	-	cd11527	35	172	4e-08	46.4	1	Nucleoside Triphosphate Pyrophosphohydrolase (EC 3.6.1.8) MazG-like domain found in dimeric 2-Deoxyuridine 5'-triphosphate nucleotidohydrolase and similar proteins. dUTPase (dUTP pyrophosphatase; EC 3.6.1.23) catalyzes the hydrolysis of dUTP to dUMP and pyrophosphate. It acts to ensure chromosomal integrity by reducing the effective ratio of dUTP/dTTP. Members in this family are dimeric dUTPases,…
NODE_1_length_166373_cov_355.293	gene_182	123211	124239	-	COG0358	64	314	1e-06	47.1	0.41	DNA primase (bacterial type) [Replication, recombination and repair].
NODE_1_length_166373_cov_355.293	gene_182	123211	124239	-	PF08275.10	177	209	0.00011	22.1	0.257812	DNA primase catalytic core, N-terminal domain
NODE_1_length_166373_cov_355.293	gene_183	124242	124406	-	PF07068.10	3	40	3.4e-05	22.7	0.0746562	Major capsid protein Gp23
NODE_1_length_166373_cov_355.293	gene_188	125631	127058	-	COG0305	53	382	1e-11	63.4	0.72	Replicative DNA helicase [Replication, recombination and repair].
NODE_1_length_166373_cov_355.293	gene_188	125631	127058	-	PF03796.14	174	409	1e-16	61	0.917647	DnaB-like helicase C terminal domain
NODE_1_length_166373_cov_355.293	gene_188	125631	127058	-	PRK06749	179	403	8e-05	42.6	0.5	replicative DNA helicase; Provisional
NODE_1_length_166373_cov_355.293	gene_188	125631	127058	-	cd00984	179	382	3e-11	61	0.79	DnaB helicase C terminal domain. The hexameric helicase DnaB unwinds the DNA duplex at the chromosome replication fork. Although the mechanism by which DnaB both couples ATP hydrolysis to translocation along DNA and denatures the duplex is unknown, a change in the quaternary structure of the protein involving dimerization of the N-terminal domain has been observed and may occur during the enzymat…
NODE_1_length_166373_cov_355.293	gene_188	125631	127058	-	cd01122	170	408	5e-08	52	0.84	GP4d_helicase is a homohexameric 5'-3' helicases. Helicases couple NTP hydrolysis to the unwinding of nucleic acid duplexes into their component strands.
NODE_1_length_166373_cov_355.293	gene_189	127068	127406	-	PF11113.7	42	97	2.7e-26	91.3	1	Head assembly gene product
NODE_1_length_166373_cov_355.293	gene_190	127399	128580	-	COG0468	11	282	1e-12	64.6	0.91	RecA/RadA recombinase [Replication, recombination and repair].
NODE_1_length_166373_cov_355.293	gene_190	127399	128580	-	PF00154.20	42	268	2.1e-11	43.7	0.855513	recA bacterial DNA recombination protein
NODE_1_length_166373_cov_355.293	gene_190	127399	128580	-	PRK09519	38	273	1e-09	57.4	0.28	DNA recombination protein RecA; Reviewed
NODE_1_length_166373_cov_355.293	gene_190	127399	128580	-	cd00983	87	292	7e-12	63.8	0.6	RecA is a bacterial enzyme which has roles in homologous recombination, DNA repair, and the induction of the SOS response. RecA couples ATP hydrolysis to DNA strand exchange.
NODE_1_length_166373_cov_355.293	gene_190	127399	128580	-	cd01393	43	232	4e-06	45.3	0.81	RecA is a bacterial enzyme which has roles in homologous recombination, DNA repair, and the induction of the SOS response. RecA couples ATP hydrolysis to DNA strand exchange. While prokaryotes have a single RecA protein, eukaryotes have multiple RecA homologs such as Rad51, DMC1 and Rad55/57. Archaea have the RecA-like homologs radA and radB.
NODE_1_length_166373_cov_355.293	gene_192	129497	130237	-	COG0207	27	222	2e-09	54.2	0.68	Thymidylate synthase [Nucleotide transport and metabolism].
NODE_1_length_166373_cov_355.293	gene_192	129497	130237	-	PF00303.18	25	226	4.2e-16	58.8	0.761194	Thymidylate synthase
NODE_1_length_166373_cov_355.293	gene_192	129497	130237	-	PRK00956	108	222	9e-05	40.4	0.48	thymidylate synthase; Provisional
NODE_1_length_166373_cov_355.293	gene_192	129497	130237	-	cd00351	27	222	7e-18	77.7	0.84	Thymidylate synthase and pyrimidine hydroxymethylase: Thymidylate synthase (TS) and deoxycytidylate hydroxymethylase (dCMP-HMase) are homologs that catalyze analogous alkylation of C5 of pyrimidine nucleotides. Both enzymes are involved in the biosynthesis of DNA precursors and are active as homodimers. However, they exhibit distinct pyrimidine base specificities and differ in the details of thei…
NODE_1_length_166373_cov_355.293	gene_193	130391	130642	-	PF14373.5	22	63	1.3e-14	53.7	1	Superinfection immunity protein
NODE_1_length_166373_cov_355.293	gene_196	131462	134158	-	COG0417	188	768	7e-39	152	0.58	DNA polymerase elongation subunit (family B) [Replication, recombination and repair].
NODE_1_length_166373_cov_355.293	gene_196	131462	134158	-	PF00136.20	366	768	1.1e-27	96.8	0.700431	DNA polymerase family B
NODE_1_length_166373_cov_355.293	gene_196	131462	134158	-	PRK05761	174	428	5e-10	60.9	0.28	DNA polymerase I; Reviewed
NODE_1_length_166373_cov_355.293	gene_196	131462	134158	-	PRK05762	188	770	4e-38	151	0.59	DNA polymerase II; Reviewed
NODE_1_length_166373_cov_355.293	gene_196	131462	134158	-	cd00145	386	782	5e-54	189	0.89	DNA polymerase type-B family catalytic domain. DNA-directed DNA polymerases elongate DNA by adding nucleotide triphosphate (dNTP) residues to the 5'-end of the growing chain of DNA. DNA-directed DNA polymerases are multifunctional with both synthetic (polymerase) and degradative modes (exonucleases) and play roles in the processes of DNA replication, repair, and recombination. DNA-dependent DNA p…
NODE_1_length_166373_cov_355.293	gene_196	131462	134158	-	cd05160	108	332	8e-34	128	0.98	DEDDy 3'-5' exonuclease domain of family-B DNA polymerases. The 3'-5' exonuclease domain of family-B DNA polymerases. This domain has a fundamental role in reducing polymerase errors and is involved in proofreading activity. Family-B DNA polymerases contain an N-terminal DEDDy DnaQ-like exonuclease domain in the same polypeptide chain as the polymerase domain, similar to family-A DNA polymerases.…
NODE_1_length_166373_cov_355.293	gene_196	131462	134158	-	cd05530	386	428	6e-06	47.3	0.12	DNA polymerase type-B B1 subfamily catalytic domain. Archaeal proteins that are involved in DNA replication are similar to those from eukaryotes. Some archaeal members also possess multiple family B DNA polymerases (B1, B2 and B3). So far there is no specific function(s) has been assigned for different members of the archaea type B DNA polymerases. Phylogenetic analyses of eubacterial, archaeal, …
NODE_1_length_166373_cov_355.293	gene_196	131462	134158	-	cd05531	390	500	7e-06	46.6	0.27	DNA polymerase type-B B2 subfamily catalytic domain. Archaeal proteins that are involved in DNA replication are similar to those from eukaryotes. Some archaeal members also possess multiple family B DNA polymerases (B1, B2 and B3). So far there is no specific function(s) has been assigned for different members of the archaea type B DNA polymerases. Phylogenetic analyses of eubacterial, archaeal, …
NODE_1_length_166373_cov_355.293	gene_196	131462	134158	-	cd05532	385	667	4e-07	51	0.49	DNA polymerase type-B alpha subfamily catalytic domain. Three DNA-dependent DNA polymerases type B (alpha, delta, and epsilon) have been identified as essential for nuclear DNA replication in eukaryotes. DNA polymerase (Pol) alpha is almost exclusively required for the initiation of DNA replication and the priming of Okazaki fragments during elongation. In most organisms no specific repair role, …
NODE_1_length_166373_cov_355.293	gene_196	131462	134158	-	cd05536	385	758	4e-13	70	0.69	DNA polymerase type-B B3 subfamily catalytic domain. Archaeal proteins that are involved in DNA replication are similar to those from eukaryotes. Some members of the archaea also possess multiple family B DNA polymerases (B1, B2 and B3). So far there is no specific function(s) has been assigned for different members of the archaea type B DNA polymerases. Phylogenetic analyses of eubacterial, arch…
NODE_1_length_166373_cov_355.293	gene_196	131462	134158	-	cd05537	386	776	2e-15	76.9	0.72	DNA polymerase type-II subfamily catalytic domain. Bacteria contain five DNA polymerases (I, II, III, IV and V). DNA polymerase II (Pol II) is a prototype for the B-family of polymerases. The role of Pol II in a variety of cellular activities, such as repair of DNA damaged by UV irradiation or oxidation has been proven by genetic studies. DNA polymerase III is the main enzyme responsible for repl…
NODE_1_length_166373_cov_355.293	gene_196	131462	134158	-	cd05777	186	293	6e-13	67.2	0.43	DEDDy 3'-5' exonuclease domain of eukaryotic DNA polymerase delta, a family-B DNA polymerase. The 3'-5' exonuclease domain of eukaryotic DNA polymerase delta. DNA polymerase delta is a family-B DNA polymerase with a catalytic subunit that contains a DEDDy-type DnaQ-like 3'-5' exonuclease domain. It is one of the three DNA-dependent type B DNA polymerases (alpha and epsilon are the other two) that…
NODE_1_length_166373_cov_355.293	gene_196	131462	134158	-	cd05778	113	293	2e-05	44.5	0.71	inactive DEDDy 3'-5' exonuclease domain of eukaryotic DNA polymerase zeta, a family-B DNA polymerase. The 3'-5' exonuclease domain of eukaryotic DNA polymerase zeta. DNA polymerase zeta is a family-B DNA polymerase which is distantly related to DNA polymerase delta. It plays a major role in translesion replication and the production of either spontaneous or induced mutations. In addition, DNA pol…
NODE_1_length_166373_cov_355.293	gene_196	131462	134158	-	cd05783	107	326	1e-11	62.7	0.87	DEDDy 3'-5' exonuclease domain of Sulfolobus solfataricus DNA polymerase B1 and similar archaeal family-B DNA polymerases. The 3'-5' exonuclease domain of Sulfolobus solfataricus DNA polymerase B1 and similar archaeal proteins. B1 is a family-B DNA polymerase. Family-B DNA polymerases contain an N-terminal DEDDy DnaQ-like exonuclease domain in the same polypeptide chain as the polymerase domain, …
NODE_1_length_166373_cov_355.293	gene_196	131462	134158	-	cd05784	188	328	2e-11	61.8	0.69	DEDDy 3'-5' exonuclease domain of Escherichia coli DNA polymerase II and similar bacterial family-B DNA polymerases. The 3'-5' exonuclease domain of Escherichia coli DNA polymerase II (Pol II) and similar bacterial proteins. Pol II is a family-B DNA polymerase. Family-B DNA polymerases contain an N-terminal DEDDy DnaQ-like exonuclease domain in the same polypeptide chain as the polymerase domain,…
NODE_1_length_166373_cov_355.293	gene_196	131462	134158	-	cd05785	191	331	8e-09	54.3	0.68	Uncharacterized bacterial subgroup of the DEDDy 3'-5' exonuclease domain of family-B DNA polymerases. A subfamily of the 3'-5' exonuclease domain of family-B DNA polymerases. This subfamily is composed of uncharacterized bacterial family-B DNA polymerases. Family-B DNA polymerases contain an N-terminal DEDDy DnaQ-like exonuclease domain in the same polypeptide chain as the polymerase domain, simi…
NODE_1_length_166373_cov_355.293	gene_196	131462	134158	-	smart00486	107	627	7e-67	227	0.93	DNA polymerase type-B family. DNA polymerase alpha, delta, epsilon and zeta chain (eukaryota), DNA polymerases in archaea, DNA polymerase II in e. coli, mitochondrial DNA polymerases and and virus DNA polymerases
NODE_1_length_166373_cov_355.293	gene_198	134460	134828	-	PF01818.16	1	121	1.2e-75	251.2	1	Bacteriophage translational regulator
NODE_1_length_166373_cov_355.293	gene_199	134830	135393	-	PF16790.4	37	173	3.1e-81	270.5	1	Bacteriophage clamp loader A subunit
NODE_1_length_166373_cov_355.293	gene_200	135395	136354	-	COG0470	126	273	4e-09	53.5	0.62	DNA polymerase III, delta prime subunit [Replication, recombination and repair].
NODE_1_length_166373_cov_355.293	gene_200	135395	136354	-	COG1222	25	194	1e-05	43.4	0.39	ATP-dependent 26S proteasome regulatory subunit [Posttranslational modification, protein turnover, chaperones].
NODE_1_length_166373_cov_355.293	gene_200	135395	136354	-	COG2256	16	237	4e-13	66.5	0.49	Replication-associated recombination protein RarA (DNA-dependent ATPase) [Replication, recombination and repair].
NODE_1_length_166373_cov_355.293	gene_200	135395	136354	-	COG2812	11	259	2e-08	52.8	0.44	DNA polymerase III, gamma/tau subunits [Replication, recombination and repair].
NODE_1_length_166373_cov_355.293	gene_200	135395	136354	-	PF00004.28	47	156	5.1e-14	52.7	0.962121	ATPase family associated with various cellular activities (AAA)
NODE_1_length_166373_cov_355.293	gene_200	135395	136354	-	PRK00440	6	218	1e-32	122	0.64	replication factor C small subunit; Reviewed
NODE_1_length_166373_cov_355.293	gene_200	135395	136354	-	PRK04132	57	213	1e-12	66	0.18	replication factor C small subunit; Provisional
NODE_1_length_166373_cov_355.293	gene_200	135395	136354	-	PRK04195	14	286	3e-19	85.7	0.52	replication factor C large subunit; Provisional
NODE_1_length_166373_cov_355.293	gene_200	135395	136354	-	PRK07133	11	61	4e-06	46.3	0.08	DNA polymerase III subunits gamma and tau; Validated
NODE_1_length_166373_cov_355.293	gene_200	135395	136354	-	PRK12402	14	313	2e-23	96.6	0.86	replication factor C small subunit 2; Reviewed
NODE_1_length_166373_cov_355.293	gene_200	135395	136354	-	PRK13342	11	232	5e-12	64	0.5	recombination factor protein RarA; Reviewed
NODE_1_length_166373_cov_355.293	gene_200	135395	136354	-	PRK14953	13	249	4e-11	61.4	0.47	DNA polymerase III subunits gamma and tau; Provisional
NODE_1_length_166373_cov_355.293	gene_200	135395	136354	-	PRK14962	11	276	6e-10	57.5	0.54	DNA polymerase III subunits gamma and tau; Provisional
NODE_1_length_166373_cov_355.293	gene_200	135395	136354	-	cd00009	30	155	8e-11	57.5	0.83	The AAA+ (ATPases Associated with a wide variety of cellular Activities) superfamily represents an ancient group of ATPases belonging to the ASCE (for additional strand, catalytic E) division of the P-loop NTPase fold. The ASCE division also includes ABC, RecA-like, VirD4-like, PilT-like, and SF1/2 helicases. Members of the AAA+ ATPases function as molecular chaperons, ATPase subunits of protease…
NODE_1_length_166373_cov_355.293	gene_200	135395	136354	-	smart00382	44	161	3e-08	46.2	0.8	ATPases associated with a variety of cellular activities. AAA - ATPases associated with a variety of cellular activities. This profile/alignment only detects a fraction of this vast family. The poorly conserved N-terminal helix is missing from the alignment.
NODE_1_length_166373_cov_355.293	gene_201	136406	137092	-	PF09116.9	115	222	2e-51	172.4	1	gp45 sliding clamp, C terminal
NODE_1_length_166373_cov_355.293	gene_204	137791	139473	-	COG0419	5	391	3e-22	98.3	0.4	DNA repair exonuclease SbcCD ATPase subunit [Replication, recombination and repair].
NODE_1_length_166373_cov_355.293	gene_204	137791	139473	-	COG0419	154	539	9e-09	55.2	0.4	DNA repair exonuclease SbcCD ATPase subunit [Replication, recombination and repair].
NODE_1_length_166373_cov_355.293	gene_204	137791	139473	-	COG1121	20	67	0.0001	41.1	0.19	ABC-type Mn2+/Zn2+ transport system, ATPase component [Inorganic ion transport and metabolism].
NODE_1_length_166373_cov_355.293	gene_204	137791	139473	-	COG1196	163	538	9e-07	48.9	0.3	Chromosome segregation ATPase [Cell cycle control, cell division, chromosome partitioning].
NODE_1_length_166373_cov_355.293	gene_204	137791	139473	-	PF13476.5	8	244	2.5e-08	34.6	0.99	AAA domain
NODE_1_length_166373_cov_355.293	gene_204	137791	139473	-	PRK01156	6	390	7e-09	56.4	0.43	chromosome segregation protein; Provisional
NODE_1_length_166373_cov_355.293	gene_204	137791	139473	-	PRK02224	5	390	8e-11	62.4	0.4	chromosome segregation protein; Provisional
NODE_1_length_166373_cov_355.293	gene_204	137791	139473	-	PRK03918	33	403	1e-08	55.5	0.39	chromosome segregation protein; Provisional
NODE_1_length_166373_cov_355.293	gene_204	137791	139473	-	cd00267	20	54	3e-05	42.2	0.23	ATP-binding cassette transporter nucleotide-binding domain. ABC transporters are a large family of proteins involved in the transport of a wide variety of different compounds, like sugars, ions, peptides, and more complex organic molecules. The nucleotide-binding domain shows the highest similarity between all members of the family. ABC transporters are a subset of nucleotide hydrolases that cont…
NODE_1_length_166373_cov_355.293	gene_204	137791	139473	-	cd03227	1	65	4e-07	47.7	0.34	ATP-binding cassette domain of non-transporter proteins. ABC-type Class 2 contains systems involved in cellular processes other than transport. These families are characterized by the fact that the ABC subunit is made up of duplicated, fused ABC modules (ABC2). No known transmembrane proteins or domains are associated with these proteins.
NODE_1_length_166373_cov_355.293	gene_204	137791	139473	-	cd03240	6	100	2e-08	52.2	0.46	ATP-binding cassette domain of Rad50. The catalytic domains of Rad50 are similar to the ATP-binding cassette of ABC transporters, but are not associated with membrane-spanning domains. The conserved ATP-binding motifs common to Rad50 and the ABC transporter family include the Walker A and Walker B motifs, the Q loop, a histidine residue in the switch region, a D-loop, and a conserved LSGG sequenc…
NODE_1_length_166373_cov_355.293	gene_204	137791	139473	-	cd03279	1	138	5e-11	60.4	0.49	ATP-binding cassette domain of sbcCD. SbcCD and other Mre11/Rad50 (MR) complexes are implicated in the metabolism of DNA ends. They cleave ends sealed by hairpin structures and are thought to play a role in removing protein bound to DNA termini.
NODE_1_length_166373_cov_355.293	gene_204	137791	139473	-	cd03279	466	552	2e-08	52.3	0.41	ATP-binding cassette domain of sbcCD. SbcCD and other Mre11/Rad50 (MR) complexes are implicated in the metabolism of DNA ends. They cleave ends sealed by hairpin structures and are thought to play a role in removing protein bound to DNA termini.
NODE_1_length_166373_cov_355.293	gene_205	139470	139676	-	PF17589.1	1	66	8.9e-40	134.7	1	Family of unknown function (DUF5487)
NODE_1_length_166373_cov_355.293	gene_207	139917	140936	-	COG0420	1	311	2e-10	58.7	0.79	DNA repair exonuclease SbcCD nuclease subunit [Replication, recombination and repair].
NODE_1_length_166373_cov_355.293	gene_207	139917	140936	-	PF00149.27	1	206	8.3e-07	29.6	0.813725	Calcineurin-like phosphoesterase
NODE_1_length_166373_cov_355.293	gene_207	139917	140936	-	cd00840	2	87	5e-08	50	0.46	Mre11 nuclease, N-terminal metallophosphatase domain. Mre11 (also known as SbcD in Escherichia coli) is a subunit of the MRX protein complex. This complex includes: Mre11, Rad50, and Xrs2/Nbs1, and plays a vital role in several nuclear processes including DNA double-strand break repair, telomere length maintenance, cell cycle checkpoint control, and meiotic recombination, in eukaryotes. During do…
NODE_1_length_166373_cov_355.293	gene_208	141113	142315	-	PF11440.7	14	367	7.4e-237	785	0.997183	DNA alpha-glucosyltransferase
NODE_1_length_166373_cov_355.293	gene_211	142731	143048	-	PF10849.7	26	95	5.7e-43	144.9	1	Protein of unknown function (DUF2654)
NODE_1_length_166373_cov_355.293	gene_225	146658	147128	-	COG0602	10	145	3e-25	95.5	0.63	Organic radical activating enzyme [General function prediction only].
NODE_1_length_166373_cov_355.293	gene_225	146658	147128	-	COG1180	1	75	3e-08	48.1	0.29	Pyruvate-formate lyase-activating enzyme [Posttranslational modification, protein turnover, chaperones].
NODE_1_length_166373_cov_355.293	gene_225	146658	147128	-	PF13353.5	12	145	1.5e-46	158.1	0.992806	4Fe-4S single cluster domain
NODE_1_length_166373_cov_355.293	gene_225	146658	147128	-	PRK11121	1	143	1e-60	185	0.93	anaerobic ribonucleotide reductase-activating protein; Provisional
NODE_1_length_166373_cov_355.293	gene_225	146658	147128	-	PRK11145	6	52	2e-07	46.9	0.2	pyruvate formate lyase-activating enzyme 1; Provisional
NODE_1_length_166373_cov_355.293	gene_225	146658	147128	-	TIGR02491	2	148	1.1e-59	198.7	0.993506	NrdG: anaerobic ribonucleoside-triphosphate reductase activating protein
NODE_1_length_166373_cov_355.293	gene_225	146658	147128	-	cd01335	20	83	8e-06	41.9	0.32	Radical SAM superfamily. Enzymes of this family generate radicals by combining a 4Fe-4S cluster and S-adenosylmethionine (SAM) in close proximity. They are characterized by a conserved CxxxCxxC motif, which coordinates the conserved iron-sulfur cluster. Mechanistically, they share the transfer of a single electron from the iron-sulfur cluster to SAM, which leads to its reductive cleavage to methi…
NODE_1_length_166373_cov_355.293	gene_226	147125	148942	-	COG1328	3	604	0	674	0.84	Anaerobic ribonucleoside-triphosphate reductase [Nucleotide transport and metabolism].
NODE_1_length_166373_cov_355.293	gene_226	147125	148942	-	NF006732.0	2	604	1.5e-273	908.8	0.855337	PRK09263.1: anaerobic ribonucleoside-triphosphate reductase
NODE_1_length_166373_cov_355.293	gene_226	147125	148942	-	PF13597.5	21	604	4.4e-168	560.5	1	Anaerobic ribonucleoside-triphosphate reductase
NODE_1_length_166373_cov_355.293	gene_226	147125	148942	-	PRK07111	11	604	8e-133	407	0.78	anaerobic ribonucleoside triphosphate reductase; Provisional
NODE_1_length_166373_cov_355.293	gene_226	147125	148942	-	PRK08270	37	488	1e-21	97.2	0.55	anaerobic ribonucleoside triphosphate reductase; Provisional
NODE_1_length_166373_cov_355.293	gene_226	147125	148942	-	PRK08271	314	605	1e-07	52.3	0.4	anaerobic ribonucleoside triphosphate reductase; Provisional
NODE_1_length_166373_cov_355.293	gene_226	147125	148942	-	PRK09263	2	604	0	1048	0.84	anaerobic ribonucleoside triphosphate reductase; Provisional
NODE_1_length_166373_cov_355.293	gene_226	147125	148942	-	PRK14704	1	604	3e-126	387	0.95	anaerobic ribonucleoside triphosphate reductase; Provisional
NODE_1_length_166373_cov_355.293	gene_226	147125	148942	-	TIGR02487	20	604	3.4e-170	565.3	1	NrdD: anaerobic ribonucleoside-triphosphate reductase
NODE_1_length_166373_cov_355.293	gene_226	147125	148942	-	cd00576	51	538	7e-108	332	0.96	Ribonucleotide reductase and Pyruvate formate lyase. Ribonucleotide reductase (RNR) and pyruvate formate lyase (PFL) are believed to have diverged from a common ancestor. They have a structurally similar ten-stranded alpha-beta barrel domain that hosts the active site, and are radical enzymes. RNRs are found in all organisms and provide the only mechanism by which nucleotides are converted to deo…
NODE_1_length_166373_cov_355.293	gene_226	147125	148942	-	cd01675	21	584	0	658	0.94	Class III ribonucleotide reductase. Ribonucleotide reductase (RNR) catalyzes the reductive synthesis of deoxyribonucleotides from their corresponding ribonucleotides. It provides the precursors necessary for DNA synthesis. RNRs are separated into three classes based on their metallocofactor usage. Class I RNRs, found in eukaryotes, bacteria, and bacteriophage, use a diiron-tyrosyl radical. Class …
NODE_1_length_166373_cov_355.293	gene_227	148939	149412	-	PF09124.9	104	157	2.2e-33	114.1	1	T4 recombination endonuclease VII, dimerisation
NODE_1_length_166373_cov_355.293	gene_233	150661	150924	-	COG0695	13	87	7e-09	46.2	0.83	Glutaredoxin [Posttranslational modification, protein turnover, chaperones].
NODE_1_length_166373_cov_355.293	gene_233	150661	150924	-	PF00462.23	12	76	9.2e-09	35.3	0.9	Glutaredoxin
NODE_1_length_166373_cov_355.293	gene_233	150661	150924	-	PRK10638	14	82	2e-08	45.6	0.7	glutaredoxin 3; Provisional
NODE_1_length_166373_cov_355.293	gene_233	150661	150924	-	PRK11200	1	87	1e-05	37.7	0.84	glutaredoxin 1; Provisional
NODE_1_length_166373_cov_355.293	gene_233	150661	150924	-	cd02066	14	87	2e-10	50.9	0.88	Glutaredoxin (GRX) family; composed of GRX, approximately 10 kDa in size, and proteins containing a GRX or GRX-like domain. GRX is a glutathione (GSH) dependent reductase, catalyzing the disulfide reduction of target proteins such as ribonucleotide reductase. It contains a redox active CXXC motif in a TRX fold and uses a similar dithiol mechanism employed by TRXs for intramolecular disulfide bond…
NODE_1_length_166373_cov_355.293	gene_233	150661	150924	-	cd02976	14	80	2e-06	39.5	0.77	NrdH-redoxin (NrdH) family; NrdH is a small monomeric protein with a conserved redox active CXXC motif within a TRX fold, characterized by a glutaredoxin (GRX)-like sequence and TRX-like activity profile. In vitro, it displays protein disulfide reductase activity that is dependent on TRX reductase, not glutathione (GSH). It is part of the NrdHIEF operon, where NrdEF codes for class Ib ribonucleot…
NODE_1_length_166373_cov_355.293	gene_233	150661	150924	-	cd03029	14	86	2e-06	40.2	0.85	Glutaredoxin (GRX) family, PRX5 hybrid subfamily; composed of hybrid proteins containing peroxiredoxin (PRX) and GRX domains, which is found in some pathogenic bacteria and cyanobacteria. PRXs are thiol-specific antioxidant (TSA) proteins that confer a protective antioxidant role in cells through their peroxidase activity in which hydrogen peroxide, peroxynitrate, and organic hydroperoxides are r…
NODE_1_length_166373_cov_355.293	gene_233	150661	150924	-	cd03418	14	82	8e-12	54.9	0.79	Glutaredoxin (GRX) family, GRX bacterial class 1 and 3 (b_1_3)-like subfamily; composed of bacterial GRXs, approximately 10 kDa in size, and proteins containing a GRX or GRX-like domain. GRX is a glutathione (GSH) dependent reductase, catalyzing the disulfide reduction of target proteins such as ribonucleotide reductase. It contains a redox active CXXC motif in a TRX fold and uses a similar dithi…
NODE_1_length_166373_cov_355.293	gene_233	150661	150924	-	cd03419	14	87	5e-06	38.7	0.77	Glutaredoxin (GRX) family, GRX human class 1 and 2 (h_1_2)-like subfamily; composed of proteins similar to human GRXs, approximately 10 kDa in size, and proteins containing a GRX or GRX-like domain. GRX is a glutathione (GSH) dependent reductase, catalyzing the disulfide reduction of target proteins such as ribonucleotide reductase. It contains a redox active CXXC motif in a TRX fold and uses a s…
NODE_1_length_166373_cov_355.293	gene_244	157969	158979	-	PF10127.8	6	136	7.1e-13	48.6	0.497959	Predicted nucleotidyltransferase
NODE_1_length_166373_cov_355.293	gene_255	162487	163068	-	COG1435	1	191	2e-88	259	0.96	Thymidine kinase [Nucleotide transport and metabolism].
NODE_1_length_166373_cov_355.293	gene_255	162487	163068	-	NF003300.0	1	189	1.8e-80	268.6	0.984536	PRK04296.1-5: thymidine kinase
NODE_1_length_166373_cov_355.293	gene_255	162487	163068	-	PF00265.17	3	185	1.6e-62	210.4	0.99435	Thymidine kinase
NODE_1_length_166373_cov_355.293	gene_255	162487	163068	-	PRK04296	1	190	1e-96	280	0.99	thymidine kinase; Provisional
NODE_1_length_166373_cov_355.293	gene_260	163820	164299	-	COG2110	1	139	1e-14	65.4	0.75	O-acetyl-ADP-ribose deacetylase (regulator of RNase III), contains Macro domain [Translation, ribosomal structure and biogenesis].
NODE_1_length_166373_cov_355.293	gene_260	163820	164299	-	PF01661.20	22	136	2.8e-09	36.9	0.983051	Macro domain
NODE_1_length_166373_cov_355.293	gene_260	163820	164299	-	cd02901	1	138	5e-28	101	0.94	Macro domain, Poa1p_like family. The macro domain is a high-affinity ADP-ribose binding module found in a variety of proteins as a stand-alone domain or in combination with other domains like in histone macroH2A and some PARPs (poly ADP-ribose polymerases). Some macro domains recognize poly ADP-ribose as a ligand. Previously identified as displaying an Appr-1"-p (ADP-ribose-1"-monophosphate) proc…
NODE_1_length_166373_cov_355.293	gene_260	163820	164299	-	smart00506	2	137	4e-23	85	1	Appr-1"-p processing enzyme. Function determined by Martzen et al. Extended family detected by reciprocal PSI-BLAST searches (unpublished results, and Pehrson & Fuji).
NODE_1_length_166373_cov_355.293	gene_262	164630	165175	-	PF01464.19	61	153	7.9e-06	25.4	0.726496	Transglycosylase SLT domain
NODE_1_length_166373_cov_355.293	gene_262	164630	165175	-	cd00254	61	172	8e-05	38.2	0.92	Lytic Transglycosylase (LT) and Goose Egg White Lysozyme (GEWL) domain. Members include the soluble and insoluble membrane-bound LTs in bacteria, the LTs in bacteriophage lambda, as well as, the eukaryotic "goose-type" lysozymes (GEWL). LTs catalyze the cleavage of the beta-1,4-glycosidic bond between N-acetylmuramic acid (MurNAc) and N-acetyl-D-glucosamine (GlcNAc), as do "goose-type" lysozymes.…

## Sheet: ES17_Domains
Contig	Feature	Feature Start in Contig	Feature End in Contig	Feature Direction in Contig	Domain Accession	Domain Start in Feature	Domain End in Feature	E-value	Bit Score	Domain Coverage	Domain Description
NODE_1_length_75134_cov_752.972	gene_5	3064	3453	+	COG3773	2	47	2e-05	39.3	0.19	Cell wall hydrolase CwlJ, involved in spore germination [Cell cycle control, cell division, chromosome partitioning, Cell wall/membrane/envelope biogenesis].
NODE_1_length_75134_cov_752.972	gene_5	3064	3453	+	PF07486.11	13	114	1.3e-09	38.8	0.846154	Cell Wall Hydrolase
NODE_1_length_75134_cov_752.972	gene_33	12808	13614	+	PF14395.5	139	213	7.9e-08	31.7	0.284585	Phage phiEco32-like COOH.NH2 ligase-type 2
NODE_1_length_75134_cov_752.972	gene_35	14238	15341	+	PF12224.7	47	176	9e-09	35.3	0.533597	Putative amidoligase enzyme
NODE_1_length_75134_cov_752.972	gene_39	17895	19097	+	COG1181	212	253	8e-05	41.1	0.13	D-alanine-D-alanine ligase and related ATP-grasp enzymes [Cell wall/membrane/envelope biogenesis, General function prediction only].
NODE_1_length_75134_cov_752.972	gene_39	17895	19097	+	PRK01372	213	253	7e-05	42	0.13	D-alanine--D-alanine ligase; Reviewed
NODE_1_length_75134_cov_752.972	gene_42	19604	20023	+	COG2105	7	137	5e-10	51.2	0.96	Uncharacterized conserved protein YtfP, gamma-glutamylcyclotransferase (GGCT)/AIG2-like family [General function prediction only].
NODE_1_length_75134_cov_752.972	gene_42	19604	20023	+	PF06094.11	9	132	1.2e-15	58	0.975207	Gamma-glutamyl cyclotransferase, AIG2-like
NODE_1_length_75134_cov_752.972	gene_42	19604	20023	+	cd06661	7	116	6e-11	54.3	0.97	GGCT-like domains, also called AIG2-like family. Gamma-glutamyl cyclotransferase (GGCT) catalyzes the formation of pyroglutamic acid (5-oxoproline) from dipeptides containing gamma-glutamyl, and is a dimeric protein. In Homo sapiens, the protein is encoded by the gene C7orf24, and the enzyme participates in the gamma-glutamyl cycle. Hereditary defects in the gamma-glutamyl cycle have been describ…
NODE_1_length_75134_cov_752.972	gene_44	20243	22033	+	COG0305	311	485	7e-10	58.4	0.4	Replicative DNA helicase [Replication, recombination and repair].
NODE_1_length_75134_cov_752.972	gene_44	20243	22033	+	COG0468	325	574	3e-06	46.5	0.74	RecA/RadA recombinase [Replication, recombination and repair].
NODE_1_length_75134_cov_752.972	gene_44	20243	22033	+	PF03796.14	311	487	1.9e-11	43.7	0.709804	DnaB-like helicase C terminal domain
NODE_1_length_75134_cov_752.972	gene_44	20243	22033	+	cd00984	319	485	6e-06	45.6	0.67	DnaB helicase C terminal domain. The hexameric helicase DnaB unwinds the DNA duplex at the chromosome replication fork. Although the mechanism by which DnaB both couples ATP hydrolysis to translocation along DNA and denatures the duplex is unknown, a change in the quaternary structure of the protein involving dimerization of the N-terminal domain has been observed and may occur during the enzymat…
NODE_1_length_75134_cov_752.972	gene_44	20243	22033	+	cd01120	331	513	6e-06	44.8	0.96	RecA-like NTPases. This family includes the NTP binding domain of F1 and V1 H+ATPases, DnaB and related helicases as well as bacterial RecA and related eukaryotic and archaeal recombinases. This group also includes bacterial conjugation proteins and related DNA transfer proteins involved in type II and type IV secretion.
NODE_1_length_75134_cov_752.972	gene_44	20243	22033	+	cd01122	311	563	1e-55	189	0.93	GP4d_helicase is a homohexameric 5'-3' helicases. Helicases couple NTP hydrolysis to the unwinding of nucleic acid duplexes into their component strands.
NODE_1_length_75134_cov_752.972	gene_45	22027	22584	+	PF01612.19	4	167	2.2e-08	33.9	0.875	3'-5' exonuclease
NODE_1_length_75134_cov_752.972	gene_45	22027	22584	+	cd06127	20	107	1e-07	46.9	0.53	DEDDh 3'-5' exonuclease domain family. DEDDh exonucleases, part of the DnaQ-like (or DEDD) exonuclease superfamily, catalyze the excision of nucleoside monophosphates at the DNA or RNA termini in the 3'-5' direction. These proteins contain four invariant acidic residues in three conserved sequence motifs termed ExoI, ExoII and ExoIII. DEDDh exonucleases are classified as such because of the prese…
NODE_1_length_75134_cov_752.972	gene_45	22027	22584	+	smart00479	20	100	2e-06	40	0.46	exonuclease domain in DNA-polymerase alpha and epsilon chain, ribonuclease T and other exonucleases.
NODE_1_length_75134_cov_752.972	gene_47	23909	24463	+	COG0717	25	175	2e-29	106	0.8	Deoxycytidine triphosphate deaminase [Nucleotide transport and metabolism].
NODE_1_length_75134_cov_752.972	gene_47	23909	24463	+	PRK00416	26	172	2e-31	112	0.8	deoxycytidine triphosphate deaminase; Reviewed
NODE_1_length_75134_cov_752.972	gene_47	23909	24463	+	TIGR02274	22	173	1.7e-29	100.8	0.855556	dCTP_deam: deoxycytidine triphosphate deaminase
NODE_1_length_75134_cov_752.972	gene_47	23909	24463	+	cd07557	65	148	4e-16	69.1	0.9	Trimeric dUTP diphosphatases. Trimeric dUTP diphosphatases, or dUTPases, are the most common family of dUTPase, found in bacteria, eukaryotes, and archaea. They catalyze the hydrolysis of the dUTP-Mg complex (dUTP-Mg) into dUMP and pyrophosphate. This reaction is crucial for the preservation of chromosomal integrity as it removes dUTP and therefore reduces the cellular dUTP/dTTP ratio, and preven…
NODE_1_length_75134_cov_752.972	gene_48	24447	24956	+	PF13392.5	61	103	2.6e-06	27	0.913043	HNH endonuclease
NODE_1_length_75134_cov_752.972	gene_54	26237	26800	+	COG0783	44	178	4e-18	75.8	0.84	DNA-binding ferritin-like protein (oxidative damage protectant) [Inorganic ion transport and metabolism, Defense mechanisms].
NODE_1_length_75134_cov_752.972	gene_54	26237	26800	+	PF00210.23	54	110	2.8e-07	30.5	0.401408	Ferritin-like domain
NODE_1_length_75134_cov_752.972	gene_54	26237	26800	+	PRK09448	55	95	1e-06	44.6	0.23	DNA starvation/stationary phase protection protein Dps; Provisional
NODE_1_length_75134_cov_752.972	gene_54	26237	26800	+	cd01043	48	176	2e-18	76.8	0.9	DPS protein, ferritin-like diiron-binding domain. DPS (DNA Protecting protein under Starved conditions) domain is a member of a broad superfamily of ferritin-like diiron-carboxylate proteins. Some DPS proteins nonspecifically bind DNA, protecting it from cleavage caused by reactive oxygen species such as the hydroxyl radicals produced during oxidation of Fe(II) by hydrogen peroxide. These protein…
NODE_1_length_75134_cov_752.972	gene_56	27050	27328	+	COG0526	1	60	3e-09	48	0.47	Thiol-disulfide isomerase or thioredoxin [Posttranslational modification, protein turnover, chaperones].
NODE_1_length_75134_cov_752.972	gene_56	27050	27328	+	COG3118	2	85	9e-07	42.7	0.26	Negative regulator of GroEL, contains thioredoxin-like and TPR-like domains [Posttranslational modification, protein turnover, chaperones].
NODE_1_length_75134_cov_752.972	gene_56	27050	27328	+	PF00085.19	3	85	1.3e-13	50.7	0.788462	Thioredoxin
NODE_1_length_75134_cov_752.972	gene_56	27050	27328	+	PRK09381	4	88	7e-10	50.4	0.76	thioredoxin; Provisional
NODE_1_length_75134_cov_752.972	gene_56	27050	27328	+	PRK10996	1	88	9e-08	44.3	0.63	thioredoxin 2; Provisional
NODE_1_length_75134_cov_752.972	gene_56	27050	27328	+	cd01659	4	70	6e-09	47.3	0.98	Thioredoxin (TRX) superfamily; a large, diverse group of proteins containing a TRX-fold. Many members contain a classic TRX domain with a redox active CXXC motif. They function as protein disulfide oxidoreductases (PDOs), altering the redox state of target proteins via the reversible oxidation of their active site dithiol. The PDO members of this superfamily include TRX, protein disulfide isomera…
NODE_1_length_75134_cov_752.972	gene_56	27050	27328	+	cd02947	2	60	1e-13	60.3	0.62	TRX family; composed of two groups: Group I, which includes proteins that exclusively encode a TRX domain; and Group II, which are composed of fusion proteins of TRX and additional domains. Group I TRX is a small ancient protein that alter the redox state of target proteins via the reversible oxidation of an active site dithiol, present in a CXXC motif, partially exposed at the protein's surface.…
NODE_1_length_75134_cov_752.972	gene_56	27050	27328	+	cd02948	3	58	8e-05	35.8	0.55	TRX domain, TRX and NDP-kinase (NDPK) fusion protein family; most members of this group are fusion proteins which contain one redox active TRX domain containing a CXXC motif and three NDPK domains, and are characterized as intermediate chains (ICs) of axonemal outer arm dynein. Dyneins are molecular motors that generate force against microtubules to produce cellular movement, and are divided into…
NODE_1_length_75134_cov_752.972	gene_56	27050	27328	+	cd02949	2	56	2e-05	37.1	0.57	TRX domain, novel NADPH thioredoxin reductase (NTR) family; composed of fusion proteins found only in oxygenic photosynthetic organisms containing both TRX and NTR domains. The TRX domain functions as a protein disulfide reductase via the reversible oxidation of an active center dithiol present in a CXXC motif, while the NTR domain functions as a reductant to oxidized TRX. The fusion protein is b…
NODE_1_length_75134_cov_752.972	gene_56	27050	27328	+	cd02950	2	85	1e-07	44.2	0.6	TRX-like protein A (TxlA) family; TxlA was originally isolated from the cyanobacterium Synechococcus. It is found only in oxygenic photosynthetic organisms. TRX is a small enzyme that participate in redox reactions, via the reversible oxidation of an active site dithiol present in a CXXC motif. Disruption of the txlA gene suggests that the protein is involved in the redox regulation of the struct…
NODE_1_length_75134_cov_752.972	gene_56	27050	27328	+	cd02956	2	85	3e-05	36.9	0.7	ybbN protein family; ybbN is a hypothetical protein containing a redox-inactive TRX-like domain. Its gene has been sequenced from several gammaproteobacteria and actinobacteria.
NODE_1_length_75134_cov_752.972	gene_56	27050	27328	+	cd02961	4	84	7e-09	47.2	0.79	Protein Disulfide Isomerase (PDIa) family, redox active TRX domains; composed of eukaryotic proteins involved in oxidative protein folding in the endoplasmic reticulum (ER) by acting as catalysts and folding assistants. Members of this family include PDI and PDI-related proteins like ERp72, ERp57 (or ERp60), ERp44, P5, PDIR, ERp46 and the transmembrane PDIs. PDI, ERp57, ERp72, P5, PDIR and ERp46 …
NODE_1_length_75134_cov_752.972	gene_56	27050	27328	+	cd02963	2	85	3e-07	42.7	0.72	TRX domain, DnaJ domain containing protein family; composed of uncharacterized proteins of about 500-800 amino acids, containing an N-terminal DnaJ domain followed by one redox active TRX domain. DnaJ is a member of the 40 kDa heat-shock protein (Hsp40) family of molecular chaperones, which regulate the activity of Hsp70s. TRX is involved in the redox regulation of many protein substrates through…
NODE_1_length_75134_cov_752.972	gene_56	27050	27328	+	cd02984	4	68	8e-05	35.7	0.68	TRX domain, PICOT (for PKC-interacting cousin of TRX) subfamily; PICOT is a protein that interacts with protein kinase C (PKC) theta, a calcium independent PKC isoform selectively expressed in skeletal muscle and T lymphocytes. PICOT contains an N-terminal TRX-like domain, which does not contain the catalytic CXXC motif, followed by one to three glutaredoxin domains. The TRX-like domain is requir…
NODE_1_length_75134_cov_752.972	gene_56	27050	27328	+	cd02998	5	56	3e-08	45.7	0.49	PDIa family, endoplasmic reticulum protein 38 (ERp38) subfamily; composed of proteins similar to the P5-like protein first isolated from alfalfa, which contains two redox active TRX (a) domains at the N-terminus, like human P5, and a C-terminal domain with homology to the C-terminal domain of ERp29, unlike human P5. The cDNA clone of this protein (named G1) was isolated from an alfalfa cDNA libra…
NODE_1_length_75134_cov_752.972	gene_56	27050	27328	+	cd03002	5	56	2e-05	37.3	0.48	PDI family, MPD1-like subfamily; composed of eukaryotic proteins similar to Saccharomyces cerevisiae MPD1 protein, which contains a single redox active TRX domain located at the N-terminus, and an ER retention signal at the C-terminus indicative of an ER-resident protein. MPD1 has been shown to suppress the maturation defect of carboxypeptidase Y caused by deletion of the yeast PDI1 gene. Other c…
NODE_1_length_75134_cov_752.972	gene_56	27050	27328	+	cd03003	5	83	3e-05	36.7	0.75	PDIa family, N-terminal ERdj5 subfamily; ERdj5, also known as JPDI and macrothioredoxin, is a protein containing an N-terminal DnaJ domain and four redox active TRX domains. This subfamily is comprised of the first TRX domain of ERdj5 located after the DnaJ domain at the N-terminal half of the protein. ERdj5 is a ubiquitous protein localized in the endoplasmic reticulum (ER) and is abundant in se…
NODE_1_length_75134_cov_752.972	gene_56	27050	27328	+	cd03005	5	56	3e-05	36.9	0.51	PDIa family, endoplasmic reticulum protein 46 (ERp46) subfamily; ERp46 is an ER-resident protein containing three redox active TRX domains. Yeast complementation studies show that ERp46 can substitute for protein disulfide isomerase (PDI) function in vivo. It has been detected in many tissues, however, transcript and protein levels do not correlate in all tissues, suggesting regulation at a postt…
NODE_1_length_75134_cov_752.972	gene_57	27315	27785	+	PF13392.5	40	79	1.7e-11	43.6	0.891304	HNH endonuclease
NODE_1_length_75134_cov_752.972	gene_58	27754	28410	+	COG1351	9	210	5e-33	119	0.73	Thymidylate synthase ThyX [Nucleotide transport and metabolism].
NODE_1_length_75134_cov_752.972	gene_58	27754	28410	+	PF02511.14	8	206	1.8e-41	141.9	0.994681	Thymidylate synthase complementing protein
NODE_1_length_75134_cov_752.972	gene_58	27754	28410	+	PRK00847	8	212	4e-41	139	0.9	FAD-dependent thymidylate synthase; Reviewed
NODE_1_length_75134_cov_752.972	gene_58	27754	28410	+	TIGR02170	8	209	4e-38	129	0.976303	thyX: thymidylate synthase, flavin-dependent
NODE_1_length_75134_cov_752.972	gene_61	28823	29152	+	COG0272	13	74	4e-07	44.5	0.1	NAD-dependent DNA ligase [Replication, recombination and repair].
NODE_1_length_75134_cov_752.972	gene_61	28823	29152	+	PF01653.17	21	64	0.00031	19.8	0.138365	NAD-dependent DNA ligase adenylation domain
NODE_1_length_75134_cov_752.972	gene_61	28823	29152	+	PRK07956	13	64	6e-06	41.6	0.08	NAD-dependent DNA ligase LigA; Validated
NODE_1_length_75134_cov_752.972	gene_61	28823	29152	+	cd00114	21	74	2e-06	43	0.18	NAD+ dependent DNA ligase adenylation domain. DNA ligases catalyze the crucial step of joining the breaks in duplex DNA during DNA replication, repair and recombination, utilizing either ATP or NAD(+) as a cofactor, but using the same basic reaction mechanism. The enzyme reacts with the cofactor to form a phosphoamide-linked AMP with the amino group of a conserved Lysine in the KXDG motif, and su…
NODE_1_length_75134_cov_752.972	gene_61	28823	29152	+	smart00532	21	64	4e-07	41.1	0.1	Ligase N family.
NODE_1_length_75134_cov_752.972	gene_63	29321	30061	+	COG1702	4	243	2e-45	155	0.69	Phosphate starvation-inducible protein PhoH, predicted ATPase [Signal transduction mechanisms].
NODE_1_length_75134_cov_752.972	gene_63	29321	30061	+	COG1875	19	215	4e-30	114	0.45	Predicted ribonuclease YlaK, contains NYN-type RNase and PhoH-family ATPase domains [General function prediction only].
NODE_1_length_75134_cov_752.972	gene_63	29321	30061	+	PF02562.15	37	242	8.1e-56	188.6	0.995122	PhoH-like protein
NODE_1_length_75134_cov_752.972	gene_63	29321	30061	+	PRK10536	1	240	1e-44	151	0.9	hypothetical protein; Provisional
NODE_1_length_75134_cov_752.972	gene_71	32750	34594	+	COG0749	363	614	5e-12	65.4	0.38	DNA polymerase I - 3'-5' exonuclease and polymerase domains [Replication, recombination and repair].
NODE_1_length_75134_cov_752.972	gene_71	32750	34594	+	PF00476.19	363	611	3e-26	92.2	0.62234	DNA polymerase family A
NODE_1_length_75134_cov_752.972	gene_71	32750	34594	+	cd06444	370	611	6e-15	74.4	0.61	Family A polymerase primarily fills DNA gaps that arise during DNA repair, recombination and replication. DNA polymerase family A, 5'-3' polymerase domain. Family A polymerase functions primarily to fill DNA gaps that arise during DNA repair, recombination and replication. DNA-dependent DNA polymerases can be classified into six main groups based upon phylogenetic relationships with E. coli polym…
NODE_1_length_75134_cov_752.972	gene_71	32750	34594	+	cd08638	363	610	1e-07	51.8	0.56	DNA polymerase theta is a low-fidelity family A enzyme implicated in translesion synthesis and in somatic hypermutation. DNA polymerase theta is a low-fidelity family A enzyme implicated in translesion synthesis (TLS) and in somatic hypermutation (SHM). DNA-dependent DNA polymerases can be classified in six main groups based upon phylogenetic relationships with E. coli polymerase I (classA), E. c…
NODE_1_length_75134_cov_752.972	gene_71	32750	34594	+	cd08643	363	614	1e-52	186	0.51	Polymerase I functions primarily to fill DNA gaps that arise during DNA repair, recombination and replication. Family A polymerase functions primarily to fill DNA gaps that arise during DNA repair, recombination and replication. DNA-dependent DNA polymerases can be classified in six main groups based upon phylogenetic relationships with E. coli polymerase I (classA), E. coli polymerase II (class …
NODE_1_length_75134_cov_752.972	gene_71	32750	34594	+	smart00482	370	571	9e-20	83.1	0.85	DNA polymerase A domain.
NODE_1_length_75134_cov_752.972	gene_80	36380	36883	+	COG4186	1	163	8e-18	74.9	0.87	Calcineurin-like phosphoesterase superfamily protein [General function prediction only].
NODE_1_length_75134_cov_752.972	gene_80	36380	36883	+	PF00149.27	4	134	7.5e-05	23.2	0.656863	Calcineurin-like phosphoesterase
NODE_1_length_75134_cov_752.972	gene_80	36380	36883	+	cd07390	4	156	3e-17	73.9	0.89	Aquifex aeolicus AQ1575 and related proteins, metallophosphatase domain. This family includes bacterial and archeal proteins homologous to AQ1575, an uncharacterized Aquifex aeolicus protein. AQ1575 may play an accessory role in DNA repair, based on the close proximity of its gene to Holliday junction resolvasome genes. The domain present in members of this family belongs to the metallophosphatas…
NODE_1_length_75134_cov_752.972	gene_87	39904	40797	+	COG1102	104	163	1e-05	41.9	0.31	Cytidylate kinase [Nucleotide transport and metabolism].
NODE_1_length_75134_cov_752.972	gene_88	40784	41602	+	COG0258	81	217	2e-08	51.2	0.38	5'-3' exonuclease [Replication, recombination and repair].
NODE_1_length_75134_cov_752.972	gene_88	40784	41602	+	cd09859	51	141	2e-05	41.6	0.5	PIN domain of the 5'-3' exonuclease of Taq DNA polymerase I and homologs. The 5'-3' exonuclease (53EXO) PIN (PilT N terminus) domain of multi-domain DNA polymerase I and single domain protein homologs are included in this family. Taq contains a polymerase domain for synthesizing a new DNA strand and a 53EXO PIN domain for cleaving RNA primers or damaged DNA strands. Taq's 53EXO PIN domain recogni…
NODE_1_length_75134_cov_752.972	gene_88	40784	41602	+	smart00475	51	218	2e-11	56.8	0.57	5'-3' exonuclease.
NODE_1_length_75134_cov_752.972	gene_90	42161	42415	+	COG2378	18	83	5e-05	37.4	0.19	Predicted DNA-binding transcriptional regulator YafY, contains an HTH and WYL domains [Transcription].
NODE_1_length_75134_cov_752.972	gene_93	42775	47196	-	PRK02224	988	1322	3e-05	46.6	0.35	chromosome segregation protein; Provisional
NODE_1_length_75134_cov_752.972	gene_93	42775	47196	-	PRK03427	577	737	3e-05	45.8	0.46	cell division protein ZipA; Provisional
NODE_1_length_75134_cov_752.972	gene_93	42775	47196	-	PRK10263	586	755	2e-05	47.4	0.11	DNA translocase FtsK; Provisional
NODE_1_length_75134_cov_752.972	gene_97	50980	51762	-	COG0741	8	118	5e-19	81.3	0.38	Soluble lytic murein transglycosylase and related regulatory proteins (some contain LysM/invasin domains) [Cell wall/membrane/envelope biogenesis].
NODE_1_length_75134_cov_752.972	gene_97	50980	51762	-	COG4623	2	106	2e-07	48.6	0.22	Membrane-bound lytic murein transglycosylase MltF [Cell wall/membrane/envelope biogenesis, Signal transduction mechanisms].
NODE_1_length_75134_cov_752.972	gene_97	50980	51762	-	PF01464.19	13	115	5.5e-23	80.8	0.91453	Transglycosylase SLT domain
NODE_1_length_75134_cov_752.972	gene_97	50980	51762	-	PRK10859	7	85	1e-05	44.1	0.16	membrane-bound lytic transglycosylase F; Provisional
NODE_1_length_75134_cov_752.972	gene_97	50980	51762	-	PRK11619	15	83	0.0001	41.2	0.11	lytic murein transglycosylase; Provisional
NODE_1_length_75134_cov_752.972	gene_97	50980	51762	-	PRK11671	12	83	3e-12	63.1	0.19	murein transglycosylase C; Provisional
NODE_1_length_75134_cov_752.972	gene_97	50980	51762	-	PRK15470	12	128	3e-08	50.3	0.57	lytic murein endotransglycosylase E; Provisional
NODE_1_length_75134_cov_752.972	gene_97	50980	51762	-	cd00254	26	117	4e-19	79	0.82	Lytic Transglycosylase (LT) and Goose Egg White Lysozyme (GEWL) domain. Members include the soluble and insoluble membrane-bound LTs in bacteria, the LTs in bacteriophage lambda, as well as, the eukaryotic "goose-type" lysozymes (GEWL). LTs catalyze the cleavage of the beta-1,4-glycosidic bond between N-acetylmuramic acid (MurNAc) and N-acetyl-D-glucosamine (GlcNAc), as do "goose-type" lysozymes.…
NODE_1_length_75134_cov_752.972	gene_99	52808	53776	-	PF09327.10	173	228	6.7e-05	22.8	0.814815	Domain of unknown function (DUF1983)
NODE_1_length_75134_cov_752.972	gene_100	53827	56784	-	COG5492	240	372	3e-13	69.1	0.4	Uncharacterized conserved protein YjdB, contains Ig-like domain [General function prediction only].
NODE_1_length_75134_cov_752.972	gene_100	53827	56784	-	COG5492	170	368	1e-10	61.4	0.56	Uncharacterized conserved protein YjdB, contains Ig-like domain [General function prediction only].
NODE_1_length_75134_cov_752.972	gene_100	53827	56784	-	PF02368.17	291	370	3.4e-15	55.6	0.974684	Bacterial Ig-like domain (group 2)
NODE_1_length_75134_cov_752.972	gene_100	53827	56784	-	smart00635	291	368	9e-08	45.9	0.94	Bacterial Ig-like domain 2.
NODE_1_length_75134_cov_752.972	gene_102	57610	58101	-	COG3772	13	163	2e-33	115	0.95	Phage-related lysozyme (muramidase), GH24 family [Cell wall/membrane/envelope biogenesis].
NODE_1_length_75134_cov_752.972	gene_102	57610	58101	-	PF00959.18	38	143	5.9e-10	39.5	0.972477	Phage lysozyme
NODE_1_length_75134_cov_752.972	gene_102	57610	58101	-	cd00735	25	112	1e-05	40.9	0.54	Bacteriophage T4-like lysozymes hydrolyse the beta-1,4-glycosidic bond between N-acetylmuramic acid (MurNAc) and N-acetylglucosamine (GlcNAc) in peptidoglycan heteropolymers of prokaryotic cell walls. Members include a variety of bacteriophages (T4, RB49, RB69, Aeh1) as well as Dictyostelium.
NODE_1_length_75134_cov_752.972	gene_102	57610	58101	-	cd00737	13	154	3e-44	143	1	Endolysins and autolysins are found in viruses and bacteria, respectively. The ds DNA phages of eubacteria use endolysins or muralytic enzymes in conjunction with hollin, a small membrane protein, to degrade the peptidoglycan found in bacterial cell walls. Similarly, bacteria produce autolysins to facilitate the biosynthesis of its cell wall hetropolymer peptidoglycan and cell division. Both endo…
NODE_1_length_75134_cov_752.972	gene_107	63030	64088	-	PF17236.1	20	343	2.1e-54	184.7	0.992857	Family of unknown function (DUF5309)
NODE_1_length_75134_cov_752.972	gene_110	65452	67695	-	COG4372	596	738	8e-06	46.2	0.28	Uncharacterized conserved protein, contains DUF3084 domain [Function unknown].
NODE_1_length_75134_cov_752.972	gene_111	67757	69298	-	COG5565	171	241	3e-10	55.4	0.87	Bacteriophage terminase large (ATPase) subunit and inactivated derivatives [Mobilome: prophages, transposons].
NODE_1_length_75134_cov_752.972	gene_111	67757	69298	-	PF03237.14	66	303	9.6e-16	58	0.953488	Terminase-like family

## Sheet: ES19_Domains
Contig	Feature	Feature Start in Contig	Feature End in Contig	Feature Direction in Contig	Domain Accession	Domain Start in Feature	Domain End in Feature	E-value	Bit Score	Domain Coverage	Domain Description
.	gene_2	1279	1695	-	PF03013.13	1	135	2.3e-46	156.9	0.992308	Pyrimidine dimer DNA glycosylase
.	gene_3	1755	2249	-	PF00959.18	24	148	4.4e-25	88.1	1	Phage lysozyme
.	gene_3	1755	2249	-	cd00442	2	104	2e-25	93.9	0.92	lysozyme_like domain. This contains several members including Soluble Lytic Transglycosylases (SLT), Goose Egg-White Lysozymes (GEWL), Hen Egg-White Lysozymes (HEWL), chitinases, bacteriophage lambda lysozymes, endolysins, autolysins, and chitosanases. All the members are involved in the hydrolysis of beta-1,4- linked polysaccharides.
.	gene_3	1755	2249	-	cd00735	2	162	3e-95	274	0.99	Bacteriophage T4-like lysozymes hydrolyse the beta-1,4-glycosidic bond between N-acetylmuramic acid (MurNAc) and N-acetylglucosamine (GlcNAc) in peptidoglycan heteropolymers of prokaryotic cell walls. Members include a variety of bacteriophages (T4, RB49, RB69, Aeh1) as well as Dictyostelium.
.	gene_3	1755	2249	-	cd00737	11	138	3e-12	58.8	0.76	Endolysins and autolysins are found in viruses and bacteria, respectively. The ds DNA phages of eubacteria use endolysins or muralytic enzymes in conjunction with hollin, a small membrane protein, to degrade the peptidoglycan found in bacterial cell walls. Similarly, bacteria produce autolysins to facilitate the biosynthesis of its cell wall hetropolymer peptidoglycan and cell division. Both endo…
.	gene_4	2286	2726	-	COG0494	6	126	1e-07	45.6	0.71	8-oxo-dGTP pyrophosphatase MutT and related house-cleaning NTP pyrophosphohydrolases, NUDIX family [Defense mechanisms].
.	gene_4	2286	2726	-	PF00293.27	2	130	7e-14	51.9	0.931298	NUDIX domain
.	gene_4	2286	2726	-	cd02883	4	102	2e-10	52.9	0.74	Nudix hydrolase is a superfamily of enzymes found in all three kingdoms of life, and it catalyzes the hydrolysis of NUcleoside DIphosphates linked to other moieties, X. Enzymes belonging to this superfamily require a divalent cation, such as Mg2+ or Mn2+ for their activity. Members of this family are recognized by a highly conserved 23-residue nudix motif (GX5EX7REUXEEXGU, where U = I, L or V), w…
.	gene_4	2286	2726	-	cd03426	25	76	2e-05	39.8	0.29	Coenzyme A pyrophosphatase (CoAse), a member of the Nudix hydrolase superfamily, functions to catalyze the elimination of oxidized inactive CoA, which can inhibit CoA-utilizing enzymes. The need of CoAses mainly arises under conditions of oxidative stress. CoAse has a conserved Nudix fold and requires a single divalent cation for catalysis. In addition to a signature Nudix motif G[X5]E[X7]REUXEEX…
.	gene_4	2286	2726	-	cd03428	33	80	1e-07	45.3	0.34	Diadenosine tetraphosphate (Ap4A) hydrolase is a member of the Nudix hydrolase superfamily. Ap4A hydrolases are well represented in a variety of prokaryotic and eukaryotic organisms. Phylogenetic analysis reveals two distinct subgroups where plant enzymes fall into one subfamily and fungi/animals/archaea enzymes, represented by this subfamily, fall into another. Bacterial enzymes are found in bot…
.	gene_4	2286	2726	-	cd03673	35	75	4e-05	38.8	0.29	Diadenosine hexaphosphate (Ap6A) hydrolase is a member of the Nudix hydrolase superfamily. Ap6A hydrolase specifically hydrolyzes diadenosine polyphosphates, but not ATP or diadenosine triphosphate, and it generates ATP as the product. Ap6A, the most preferred substrate, hydrolyzes to produce two ATP molecules, which is a novel hydrolysis mode for Ap6A. These results indicate that Ap6A hydrolase …
.	gene_4	2286	2726	-	cd04662	4	83	2e-06	42.1	0.54	Members of the Nudix hydrolase superfamily catalyze the hydrolysis of NUcleoside DIphosphates linked to other moieties, X. Enzymes belonging to this superfamily require a divalent cation, such as Mg2+ or Mn2+, for their activity and contain a highly conserved 23-residue nudix motif (GX5EX7REUXEEXGU, where U = I, L or V), which functions as a metal binding and catalytic site. Substrates of nudix h…
.	gene_4	2286	2726	-	cd04666	22	99	2e-07	44.5	0.54	Members of the Nudix hydrolase superfamily catalyze the hydrolysis of NUcleoside DIphosphates linked to other moieties, X. Enzymes belonging to this superfamily require a divalent cation, such as Mg2+ or Mn2+, for their activity and contain a highly conserved 23-residue nudix motif (GX5EX7REUXEEXGU, where U = I, L or V), which functions as a metal binding and catalytic site. Substrates of nudix h…
.	gene_4	2286	2726	-	cd04700	5	62	5e-07	44.1	0.38	DR1025 from Deinococcus radiodurans, a member of the Nudix hydrolase superfamily, show nucleoside triphosphatase and dinucleoside polyphosphate pyrophosphatase activities. Like other enzymes belonging to this superfamily, it requires a divalent cation, in this case Mg2+, for its activity. It also contains a highly conserved 23-residue nudix motif (GX5EX7REUXEEXGU, where U = I, L or V), which func…
.	gene_22	11815	12345	-	PF06841.11	14	165	4.1e-17	62.2	0.992537	T4-like virus tail tube protein gp19
.	gene_25	13776	14366	+	PF11246.7	1	187	9.3e-91	302.5	1	Base plate wedge protein 53
.	gene_26	14350	16077	+	COG3772	184	323	4e-05	41.2	0.72	Phage-related lysozyme (muramidase), GH24 family [Cell wall/membrane/envelope biogenesis].
.	gene_26	14350	16077	+	PF06714.10	33	173	3.3e-65	218.6	1	Gp5 N-terminal OB domain
.	gene_26	14350	16077	+	cd00735	175	340	3e-106	318	1	Bacteriophage T4-like lysozymes hydrolyse the beta-1,4-glycosidic bond between N-acetylmuramic acid (MurNAc) and N-acetylglucosamine (GlcNAc) in peptidoglycan heteropolymers of prokaryotic cell walls. Members include a variety of bacteriophages (T4, RB49, RB69, Aeh1) as well as Dictyostelium.
.	gene_26	14350	16077	+	cd00737	178	304	3e-08	51.1	0.73	Endolysins and autolysins are found in viruses and bacteria, respectively. The ds DNA phages of eubacteria use endolysins or muralytic enzymes in conjunction with hollin, a small membrane protein, to degrade the peptidoglycan found in bacterial cell walls. Similarly, bacteria produce autolysins to facilitate the biosynthesis of its cell wall hetropolymer peptidoglycan and cell division. Both endo…
.	gene_28	16607	16900	+	PF05488.12	13	88	1.6e-06	28.1	0.971429	PAAR motif
.	gene_28	16607	16900	+	cd14737	2	97	4e-29	100	1	proline-alanine-alanine-arginine (PAAR) domain. This domain is found in the PAAR (proline-alanine-alanine-arginine) repeat family, where it forms a sharp conical extension on the VgrG spike, a trimeric protein complex of the bacterial type VI secretion system (T6SS). The T6SS is responsible for translocation of a wide variety of toxic effector molecules, allowing predatory cells to kill prokaryot…
.	gene_30	18888	21986	+	cd00063	8	102	6e-05	41.7	0.93	Fibronectin type 3 domain; One of three types of internal repeats found in the plasma protein fibronectin. Its tenth fibronectin type III repeat contains an RGD cell recognition sequence in a flexible loop between 2 strands. Approximately 2% of all animal proteins contain the FN3 repeat; including extracellular and intracellular proteins, membrane spanning cytokine receptors, growth hormone recep…
.	gene_32	23047	23913	+	PF07880.10	7	271	1.4e-116	389	0.996491	Bacteriophage T4 gp9/10-like protein
.	gene_33	23913	25718	+	PF07880.10	2	264	9.7e-102	340.3	0.996491	Bacteriophage T4 gp9/10-like protein
.	gene_35	26374	27924	+	COG4675	336	406	2e-08	51	0.42	Microcystin-dependent protein (function unknown) [Function unknown].
.	gene_35	26374	27924	+	PF14928.5	403	514	2.7e-39	134.1	0.941667	Short tail fibre protein receptor-binding domain
.	gene_36	27934	29391	+	PF07921.11	371	481	1.2e-34	118.2	0.989247	Fibritin C-terminal region
.	gene_38	30354	31124	+	PF11649.7	3	249	1.8e-135	450.6	0.928058	Virus neck protein
.	gene_39	31166	31984	+	PF16724.4	1	234	9.7e-144	477	1	T4-like virus Myoviridae tail sheath stabiliser
.	gene_40	31993	32487	+	PF11053.7	1	149	1.6e-87	291.2	1	Terminase DNA packaging enzyme
.	gene_41	32471	34303	+	PF17289.1	399	572	1.7e-44	151.5	0.987097	Terminase RNaseH-like domain
.	gene_42	34335	36314	+	COG3497	405	645	7e-08	52	0.6	Phage tail sheath protein FI [Mobilome: prophages, transposons].
.	gene_42	34335	36314	+	PF04984.13	348	541	1.9e-46	157.9	1	Phage tail sheath protein subtilisin-like domain
.	gene_43	36431	36922	+	PF06841.11	19	163	1.5e-17	63.6	0.985075	T4-like virus tail tube protein gp19
.	gene_44	37006	38580	+	PF07230.10	6	508	0	1045.7	1	Bacteriophage T4-like capsid assembly protein (Gp20)
.	gene_47	39244	39882	+	PF03420.12	6	190	2.1e-116	386	1	Prohead core protein serine protease
.	gene_49	40741	42306	+	PF07068.10	9	501	2.5e-303	1006.3	1	Major capsid protein Gp23
.	gene_50	42390	43673	+	PF07068.10	143	232	7.2e-09	34.8	0.178782	Major capsid protein Gp23
.	gene_51	43703	44707	-	PF09414.9	29	227	2.9e-24	86.1	0.993789	RNA ligase
.	gene_51	43703	44707	-	TIGR02307	2	334	3.3e-139	461.9	1	RNA_lig_RNL2: RNA ligase, Rnl2 family
.	gene_53	44999	45166	-	PF11242.7	2	54	2.4e-25	88.4	0.84127	Protein of unknown function (DUF2774)
.	gene_56	47454	48965	+	COG1061	118	458	1e-30	121	0.75	Superfamily II DNA or RNA helicase [Transcription, Replication, recombination and repair].
.	gene_56	47454	48965	+	COG1111	113	240	2e-08	53.5	0.24	ERCC4-related helicase [Replication, recombination and repair].
.	gene_56	47454	48965	+	COG1204	118	248	9e-09	55.1	0.17	Replicative superfamily II helicase [Replication, recombination and repair].
.	gene_56	47454	48965	+	COG4096	99	457	5e-10	59	0.4	Type I site-specific restriction endonuclease, part of a restriction-modification system [Defense mechanisms].
.	gene_56	47454	48965	+	PF04851.14	128	261	2.5e-14	53.6	0.847953	Type III restriction enzyme, res subunit
.	gene_56	47454	48965	+	PRK13766	136	240	1e-06	49.1	0.13	Hef nuclease; Provisional
.	gene_56	47454	48965	+	cd00046	130	263	4e-11	59.7	0.94	DEAD-like helicases superfamily. A diverse family of proteins involved in ATP-dependent RNA or DNA unwinding. This domain contains the ATP-binding region.
.	gene_56	47454	48965	+	cd00079	331	448	4e-11	59.6	0.89	Helicase superfamily c-terminal domain; associated with DEXDc-, DEAD-, and DEAH-box proteins, yeast initiation factor 4A, Ski2p, and Hepatitis C virus NS3 helicases; this domain is found in a wide variety of helicases and helicase related proteins; may not be an autonomously folding unit, but an integral part of the helicase; 4 helicase superfamilies at present according to the organization of th…
.	gene_56	47454	48965	+	smart00487	110	281	5e-18	77.1	0.85	DEAD-like helicases superfamily.
.	gene_56	47454	48965	+	smart00490	366	444	2e-08	46.8	0.96	helicase superfamily c-terminal domain.
.	gene_57	48991	49221	+	PF11637.7	21	74	1.9e-30	104.6	1	ATP-dependant DNA helicase UvsW
.	gene_58	49277	49444	-	PF10886.7	3	55	1e-34	118.4	1	Protein of unknown function (DUF2685)
.	gene_60	49697	50110	-	PF11056.7	9	137	5.2e-50	169	1	Recombination, repair and ssDNA binding protein UvsY
.	gene_61	50177	50575	-	COG3628	28	100	7e-10	50.5	0.63	Phage baseplate assembly protein W [Mobilome: prophages, transposons].
.	gene_61	50177	50575	-	PF04965.13	30	116	3.3e-16	58.7	0.947368	Gene 25-like lysozyme
.	gene_62	50575	51201	-	PF12322.7	4	206	8.3e-71	237.6	1	T4 bacteriophage base plate protein
.	gene_63	51252	52004	+	PF12322.7	5	201	5.5e-65	218.6	1	T4 bacteriophage base plate protein
.	gene_65	53196	53654	+	PF11110.7	1	151	2.7e-106	351.9	0.980519	Baseplate hub distal subunit
.	gene_67	55432	56526	+	PF11091.7	5	358	5.3e-160	532	0.994253	Tail-tube assembly protein
.	gene_68	56526	57491	+	PF06841.11	155	247	2.8e-05	23.9	0.61194	T4-like virus tail tube protein gp19
.	gene_70	57870	59927	-	PF03496.13	410	617	2.1e-24	85.9	0.898477	ADP-ribosyltransferase exoenzyme
.	gene_70	57870	59927	-	cd00233	417	622	5e-15	72.8	0.78	VIP2; A family of actin-ADP-ribosylating toxin. A member of the Bacillus-prodiced vegetative insecticidal proteins (VIPs) possesses high specificity against the major insect pest, corn rootworms, and belongs to a classs of binary toxins and regulators of biological pathways distinct from classical A-B toxins. A novel family of insecticidal ADP-ribosyltransferses were isolated from Bacillus cereus…
.	gene_71	59931	61979	-	PF03496.13	374	615	1e-57	194.6	1	ADP-ribosyltransferase exoenzyme
.	gene_71	59931	61979	-	cd00233	381	612	3e-49	170	0.92	VIP2; A family of actin-ADP-ribosylating toxin. A member of the Bacillus-prodiced vegetative insecticidal proteins (VIPs) possesses high specificity against the major insect pest, corn rootworms, and belongs to a classs of binary toxins and regulators of biological pathways distinct from classical A-B toxins. A novel family of insecticidal ADP-ribosyltransferses were isolated from Bacillus cereus…
.	gene_73	62217	63680	-	COG1793	134	472	4e-18	83.6	0.69	ATP-dependent DNA ligase [Replication, recombination and repair].
.	gene_73	62217	63680	-	PF01068.20	135	367	5.1e-44	150.3	1	ATP dependent DNA ligase domain
.	gene_73	62217	63680	-	PRK01109	124	411	4e-06	47.3	0.41	ATP-dependent DNA ligase; Provisional
.	gene_73	62217	63680	-	PRK09125	277	412	2e-06	47.2	0.45	DNA ligase; Provisional
.	gene_73	62217	63680	-	cd07896	136	367	5e-09	53.3	0.97	Adenylation domain of kDNA ligases and similar proteins. The mitochondrial DNA of parasitic protozoans is highly unusual. It is termed the kinetoplast DNA (kDNA) and consists of circular DNA molecules (maxicircles) and several thousand smaller circular molecules (minicircles). This group is composed of kDNA ligase, Chlorella virus DNA ligase, and similar proteins. kDNA ligase and Chlorella virus …
.	gene_73	62217	63680	-	cd07901	298	367	7e-06	44.8	0.34	Adenylation domain of archaeal and bacterial LigB-like DNA ligases. ATP-dependent polynucleotide ligases catalyze phosphodiester bond formation using nicked nucleic acid substrates with the high energy nucleotide of ATP as a cofactor in a three step reaction mechanism. DNA ligases play a vital role in the diverse processes of DNA replication, recombination and repair. ATP-dependent ligases are pr…
.	gene_73	62217	63680	-	cd07903	136	367	1e-05	44.5	0.88	Adenylation domain of DNA Ligase IV. ATP-dependent polynucleotide ligases catalyze phosphodiester bond formation using nicked nucleic acid substrates with the high energy nucleotide of ATP as a cofactor in a three step reaction mechanism. DNA ligases play a vital role in the diverse processes of DNA replication, recombination and repair. ATP-dependent ligases are present in many organisms such as…
.	gene_73	62217	63680	-	cd07905	159	233	2e-05	43	0.32	Adenylation domain of Mycobacterium tuberculosis LigC-like ATP-dependent DNA ligases. Bacterial DNA ligases are divided into two broad classes: NAD-dependent and ATP-dependent. All bacterial species have a NAD-dependent DNA ligase (LigA). Some bacterial genomes contain multiple genes for DNA ligases that are predicted to use ATP as their cofactor, including Mycobacterium tuberculosis LigB, LigC, …
.	gene_76	64797	65177	-	PF08010.10	1	124	6.3e-59	197.6	0.884058	Bacteriophage protein GP30.3
.	gene_81	66410	66742	-	PF06019.10	1	110	4.7e-57	191.1	1	Phage GP30.8 protein
.	gene_84	67670	68005	-	PF00166.20	8	110	3e-15	55.9	1	Chaperonin 10 Kd subunit
.	gene_84	67670	68005	-	cd00320	8	110	2e-07	43.3	0.93	Chaperonin 10 Kd subunit (cpn10 or GroES); Cpn10 cooperates with chaperonin 60 (cpn60 or GroEL), an ATPase, to assist the folding and assembly of proteins and is found in eubacterial cytosol, as well as in the matrix of mitochondria and chloroplasts. It forms heptameric rings with a dome-like structure, forming a lid to the large cavity of the tetradecameric cpn60 cylinder and thereby tightly reg…
.	gene_85	68063	68371	-	PF10902.7	13	86	4.9e-19	68.4	0.986486	WYL_2, Sm-like SH3 beta-barrel fold
.	gene_87	68608	69189	-	COG0117	24	183	2e-14	65	0.68	Pyrimidine deaminase domain of riboflavin biosynthesis protein RibD [Coenzyme transport and metabolism].
.	gene_87	68608	69189	-	COG0590	104	168	9e-15	66.2	0.43	tRNA(Arg) A34 adenosine deaminase TadA [Translation, ribosomal structure and biogenesis].
.	gene_87	68608	69189	-	COG2131	1	179	3e-41	137	0.91	Deoxycytidylate deaminase [Nucleotide transport and metabolism].
.	gene_87	68608	69189	-	PF00383.22	3	151	6.6e-38	128.6	0.970297	Cytidine and deoxycytidylate deaminase zinc-binding region
.	gene_87	68608	69189	-	PRK10786	102	148	5e-06	43.6	0.12	bifunctional diaminohydroxyphosphoribosylaminopyrimidine deaminase/5-amino-6-(5-phosphoribosylamino)uracil reductase; Provisional
.	gene_87	68608	69189	-	PRK10860	104	149	3e-05	40.6	0.25	tRNA-specific adenosine deaminase; Provisional
.	gene_87	68608	69189	-	cd00786	102	145	4e-10	52.6	0.45	Cytidine and deoxycytidylate deaminase zinc-binding region. The family contains cytidine deaminases, nucleoside deaminases, deoxycytidylate deaminases and riboflavin deaminases. Also included are the apoBec family of mRNA editing enzymes. All members are Zn dependent. The zinc ion in the active site plays a central role in the proposed catalytic mechanism, activating a water molecule to form a hy…
.	gene_87	68608	69189	-	cd01284	104	168	3e-12	59.2	0.54	Riboflavin-specific deaminase. Riboflavin biosynthesis protein RibD (Diaminohydroxyphosphoribosylaminopyrimidine deaminase) catalyzes the deamination of 2,5-diamino-6-ribosylamino-4(3H)-pyrimidinone 5'-phosphate, which is an intermediate step in the biosynthesis of riboflavin.The ribG gene of Bacillus subtilis and the ribD gene of E. coli are bifunctional and contain this deaminase domain and a r…
.	gene_87	68608	69189	-	cd01285	104	152	1e-13	62.6	0.45	Nucleoside deaminases include adenosine, guanine and cytosine deaminases. These enzymes are Zn dependent and catalyze the deamination of nucleosides. The zinc ion in the active site plays a central role in the proposed catalytic mechanism, activating a water molecule to form a hydroxide ion that performs a nucleophilic attack on the substrate. The functional enzyme is a homodimer. Cytosine deamin…
.	gene_87	68608	69189	-	cd01286	7	165	2e-54	170	0.97	Deoxycytidylate deaminase domain. Deoxycytidylate deaminase catalyzes the deamination of dCMP to dUMP, providing the nucleotide substrate for thymidylate synthase. The enzyme binds Zn++, which is required for catalytic activity. The activity of the enzyme is allosterically regulated by the ratio of dCTP to dTTP not only in eukaryotic cells but also in T-even phage-infected Escherichia coli, with …
.	gene_94	71009	71914	-	COG0241	156	224	8e-05	40	0.37	Histidinol phosphatase or a related phosphatase [Amino acid transport and metabolism].
.	gene_94	71009	71914	-	COG0563	3	130	7e-07	45.7	0.7	Adenylate kinase or related kinase [Nucleotide transport and metabolism].
.	gene_94	71009	71914	-	COG0645	3	123	3e-06	43.9	0.7	Predicted kinase [General function prediction only].
.	gene_94	71009	71914	-	COG4088	2	145	7e-05	40.6	0.52	tRNA Uridine 5-carbamoylmethylation protein Kti12 (Killer toxin insensitivity protein) [Translation, ribosomal structure and biogenesis].
.	gene_94	71009	71914	-	COG4639	2	150	1e-14	67.9	0.83	Predicted kinase [General function prediction only].
.	gene_94	71009	71914	-	PF13671.5	6	146	1.2e-20	74.1	0.965035	AAA domain
.	gene_94	71009	71914	-	cd01427	161	296	8e-07	45.1	1	Haloacid dehalogenase-like hydrolases. The haloacid dehalogenase-like (HAD) superfamily includes L-2-haloacid dehalogenase, epoxide hydrolase, phosphoserine phosphatase, phosphomannomutase, phosphoglycolate phosphatase, P-type ATPase, and many others. This superfamily includes a variety of enzymes that catalyze the cleavage of substrate C-Cl, P-C, and P-OP bonds via nucleophilic substitution path…
.	gene_94	71009	71914	-	cd07502	159	301	1e-65	204	0.94	C-terminal phosphatase domain of T4 polynucleotide kinase/phosphatase (PNKP) and related phosphatases. This family includes the C-terminal domain of the bifunctional enzyme T4 polynucleotide kinase/phosphatase, PNKP. The PNKP phosphatase domain can catalyze the hydrolytic removal of the 3'-phosphoryl of DNA, RNA and deoxynucleoside 3'-monophosphates. This family belongs to the haloacid dehalogena…
.	gene_99	73095	73598	-	PF17527.1	1	166	3.6e-95	316.2	0.994012	Phage ALP protein
.	gene_100	73663	74787	-	PF09511.9	52	246	4.3e-24	85.5	1	RNA ligase
.	gene_100	73663	74787	-	TIGR02308	2	374	4.5e-191	632.8	1	RNA_lig_T4_1: RNA ligase, T4 RnlA family
.	gene_101	74840	75250	-	PF01541.23	34	112	4.9e-06	26.6	0.769231	GIY-YIG catalytic domain
.	gene_101	74840	75250	-	cd00719	36	125	6e-06	39.3	0.98	GIY-YIG nuclease domain superfamily. The GIY-YIG nuclease domain superfamily includes a large and diverse group of proteins involved in many cellular processes, such as class I homing GIY-YIG family endonucleases, prokaryotic nucleotide excision repair proteins UvrC and Cho, type II restriction enzymes, the endonuclease/reverse transcriptase of eukaryotic retrotransposable elements, and a family …
.	gene_101	74840	75250	-	cd10434	42	131	5e-05	37.1	0.84	Catalytic GIY-YIG domain of nucleotide excision repair endonucleases UvrC, Cho, and similar proteins. UvrC is essential for nucleotide excision repair (NER). The N-terminal catalytic GIY-YIG domain of UvrC (also known as Uri domain) is responsible for the 3' incision reaction and the C-terminal half of UvrC, consisting of an UvrB-binding domain (UvrBb), EndoV-like nuclease domain and a helix-hair…
.	gene_101	74840	75250	-	cd10436	34	132	3e-30	105	0.99	Catalytic GIY-YIG domain of coliphage T4 non-specific endonuclease II, type II restriction endonuclease R.Hpy188I, and similar proteins. This family includes two different GIY-YIG enzymes, coliphage T4 non-specific endonuclease II (EndoII), and type II restriction endonuclease R.Hpy188I. They display high sequence similarity to each other, and both of them contain an extra N-terminal hairpin that…
.	gene_101	74840	75250	-	smart00465	33	135	2e-09	45.9	0.98	GIY-YIG type nucleases (URI domain).
.	gene_102	75278	76456	-	COG0208	1	382	3e-73	232	0.98	Ribonucleotide reductase beta subunit, ferritin-like domain [Nucleotide transport and metabolism].
.	gene_102	75278	76456	-	NF006576.0	3	388	1.7e-144	480.6	0.986702	PRK09101.1: ribonucleotide-diphosphate reductase subunit beta
.	gene_102	75278	76456	-	PF00268.20	33	335	9.5e-35	120.3	0.938849	Ribonucleotide reductase, small chain
.	gene_102	75278	76456	-	PRK07209	48	352	3e-11	61.9	0.72	ribonucleotide-diphosphate reductase subunit beta; Validated
.	gene_102	75278	76456	-	PRK09101	3	382	5e-179	505	0.97	ribonucleotide-diphosphate reductase subunit beta; Reviewed
.	gene_102	75278	76456	-	PRK09614	16	383	4e-25	102	0.96	ribonucleotide-diphosphate reductase subunit beta; Reviewed
.	gene_102	75278	76456	-	PRK13965	47	161	1e-06	47.5	0.34	ribonucleotide-diphosphate reductase subunit beta; Provisional
.	gene_102	75278	76456	-	PRK13967	29	161	5e-06	45.5	0.41	ribonucleotide-diphosphate reductase subunit beta; Provisional
.	gene_102	75278	76456	-	cd01049	28	355	2e-69	221	0.99	Ribonucleotide Reductase, R2/beta subunit, ferritin-like diiron-binding domain. Ribonucleotide Reductase, R2/beta subunit (RNRR2) is a member of a broad superfamily of ferritin-like diiron-carboxylate proteins. The RNR protein catalyzes the conversion of ribonucleotides to deoxyribonucleotides and is found in all eukaryotes, many prokaryotes, several viruses, and few archaea. The catalytically ac…
.	gene_103	76508	78772	-	COG0209	47	753	0	556	0.98	Ribonucleotide reductase alpha subunit [Nucleotide transport and metabolism].
.	gene_103	76508	78772	-	NF006578.0	3	752	5e-300	996.2	0.99343	PRK09103.1: ribonucleoside-diphosphate reductase subunit alpha
.	gene_103	76508	78772	-	PF02867.14	220	663	2.3e-114	382.7	0.837786	Ribonucleotide reductase, barrel domain
.	gene_103	76508	78772	-	PRK06406	185	671	6e-27	114	0.54	ribonucleotide-diphosphate reductase subunit alpha; Validated
.	gene_103	76508	78772	-	PRK06539	4	727	2e-83	282	0.86	ribonucleotide-diphosphate reductase subunit alpha; Validated
.	gene_103	76508	78772	-	PRK06948	391	634	5e-13	70.2	0.38	ribonucleotide reductase-like protein; Provisional
.	gene_103	76508	78772	-	PRK07088	19	751	8e-102	331	0.92	ribonucleotide-diphosphate reductase subunit alpha; Validated
.	gene_103	76508	78772	-	PRK07187	86	754	3e-47	176	0.9	ribonucleotide-diphosphate reductase subunit alpha; Validated
.	gene_103	76508	78772	-	PRK07207	4	651	8e-65	231	0.64	ribonucleotide-diphosphate reductase subunit alpha; Validated
.	gene_103	76508	78772	-	PRK07306	99	631	4e-29	121	0.72	ribonucleotide-diphosphate reductase subunit alpha; Validated
.	gene_103	76508	78772	-	PRK07632	99	631	9e-39	151	0.74	ribonucleotide-diphosphate reductase subunit alpha; Validated
.	gene_103	76508	78772	-	PRK08115	175	631	1e-18	88.4	0.51	ribonucleotide-diphosphate reductase subunit alpha; Validated
.	gene_103	76508	78772	-	PRK08188	104	754	6e-37	145	0.83	ribonucleotide-diphosphate reductase subunit alpha; Validated
.	gene_103	76508	78772	-	PRK08332	467	654	3e-18	87.9	0.11	ribonucleotide-diphosphate reductase subunit alpha; Validated
.	gene_103	76508	78772	-	PRK08447	3	727	1e-96	318	0.89	ribonucleotide-diphosphate reductase subunit alpha; Validated
.	gene_103	76508	78772	-	PRK08665	134	631	4e-26	111	0.55	ribonucleotide-diphosphate reductase subunit alpha; Validated
.	gene_103	76508	78772	-	PRK09102	132	752	2e-54	196	0.88	ribonucleotide-diphosphate reductase subunit alpha; Validated
.	gene_103	76508	78772	-	PRK09103	4	754	0	1063	0.99	ribonucleotide-diphosphate reductase subunit alpha; Validated
.	gene_103	76508	78772	-	PRK09209	4	752	2e-93	309	0.94	ribonucleotide-diphosphate reductase subunit alpha; Validated
.	gene_103	76508	78772	-	PRK12364	12	752	7e-89	298	0.83	ribonucleotide-diphosphate reductase subunit alpha; Provisional
.	gene_103	76508	78772	-	PRK12365	2	653	2e-72	254	0.61	ribonucleotide-diphosphate reductase subunit alpha; Provisional
.	gene_103	76508	78772	-	TIGR02506	143	731	2.5e-160	532.9	1	NrdE_NrdA: ribonucleoside-diphosphate reductase, alpha subunit
.	gene_103	76508	78772	-	cd00576	192	728	1e-32	129	0.93	Ribonucleotide reductase and Pyruvate formate lyase. Ribonucleotide reductase (RNR) and pyruvate formate lyase (PFL) are believed to have diverged from a common ancestor. They have a structurally similar ten-stranded alpha-beta barrel domain that hosts the active site, and are radical enzymes. RNRs are found in all organisms and provide the only mechanism by which nucleotides are converted to deo…
.	gene_103	76508	78772	-	cd01679	167	730	5e-141	424	0.99	Class I ribonucleotide reductase. Ribonucleotide reductase (RNR) catalyzes the reductive synthesis of deoxyribonucleotides from their corresponding ribonucleotides. It provides the precursors necessary for DNA synthesis. RNRs are separated into three classes based on their metallocofactor usage. Class I RNRs, found in eukaryotes, bacteria, and many viruses, use a diiron-tyrosyl radical. Class II …
.	gene_103	76508	78772	-	cd02888	192	637	5e-49	178	0.86	Class II ribonucleotide reductase, dimeric form. Ribonucleotide reductase (RNR) catalyzes the reductive synthesis of deoxyribonucleotides from their corresponding ribonucleotides. It provides the precursors necessary for DNA synthesis. RNRs are separated into three classes based on their metallocofactor usage. Class I RNRs, found in eukaryotes, bacteria, and bacteriophage, use a diiron-tyrosyl ra…
.	gene_105	79330	80190	-	COG0207	1	286	1e-105	309	0.97	Thymidylate synthase [Nucleotide transport and metabolism].
.	gene_105	79330	80190	-	PF00303.18	2	286	3.9e-97	324.5	1	Thymidylate synthase
.	gene_105	79330	80190	-	PRK00956	109	231	3e-15	70.8	0.6	thymidylate synthase; Provisional
.	gene_105	79330	80190	-	PRK01827	1	286	2e-123	355	0.97	thymidylate synthase; Reviewed
.	gene_105	79330	80190	-	PRK13821	1	286	3e-69	218	0.86	thymidylate synthase; Provisional
.	gene_105	79330	80190	-	TIGR03284	2	286	2.4e-87	290.8	1	thym_sym: thymidylate synthase
.	gene_105	79330	80190	-	cd00351	3	227	1e-95	282	0.98	Thymidylate synthase and pyrimidine hydroxymethylase: Thymidylate synthase (TS) and deoxycytidylate hydroxymethylase (dCMP-HMase) are homologs that catalyze analogous alkylation of C5 of pyrimidine nucleotides. Both enzymes are involved in the biosynthesis of DNA precursors and are active as homodimers. However, they exhibit distinct pyrimidine base specificities and differ in the details of thei…
.	gene_107	80604	81185	-	COG0262	1	148	1e-11	57.3	0.72	Dihydrofolate reductase [Coenzyme transport and metabolism].
.	gene_107	80604	81185	-	PF00186.18	22	157	3e-17	62.7	0.708075	Dihydrofolate reductase
.	gene_107	80604	81185	-	PRK10769	23	148	2e-06	44	0.64	dihydrofolate reductase; Provisional
.	gene_107	80604	81185	-	cd00209	2	193	5e-18	76.4	0.95	Dihydrofolate reductase (DHFR). Reduces 7,8-dihydrofolate to 5,6,7,8-tetrahydrofolate with NADPH as a cofactor. This is an essential step in the biosynthesis of deoxythymidine phosphate since 5,6,7,8-tetrahydrofolate is required to regenerate 5,10-methylenetetrahydrofolate which is then utilized by thymidylate synthase. Inhibition of DHFR interrupts thymidilate synthesis and DNA replication, inhi…
.	gene_113	82952	83857	-	PF08804.9	28	116	2.9e-51	171.4	1	gp32 DNA binding protein like
.	gene_114	83912	84544	-	cd10444	3	97	2e-18	75.5	0.97	N-terminal catalytic GIY-YIG domain of bacteriophage T4 segABCDEFG gene encoding proteins. The prototypes of Seg family are proteins SegA, B, C, D, E, F, and G encoded by five seg genes segA, B, C, D, E, F, and G in the bacteriophage T4 genome, respectively. SegA, B, C, D, E, F, and G are not encoded by introns, but free-standing homologs of the GIY-YIG family of endonucleases encoded by group I …
.	gene_115	84546	85199	-	PF08994.9	113	216	2.8e-55	185.2	1	T4 gene Gp59 loader of gp41 DNA helicase C-term
.	gene_116	85196	85534	-	PF16805.4	38	108	5.5e-28	96.8	0.985507	Phage late-transcription coactivator
.	gene_117	85512	85781	-	PF11126.7	22	88	3.7e-41	139.1	1	Transcriptional regulator DsbA
.	gene_118	85790	86707	-	COG0258	63	206	3e-06	45	0.43	5'-3' exonuclease [Replication, recombination and repair].
.	gene_118	85790	86707	-	PF09293.9	183	305	8.3e-70	232.8	1	T4 RNase H, C terminal
.	gene_118	85790	86707	-	PRK05755	113	240	4e-09	55.5	0.14	DNA polymerase I; Provisional
.	gene_118	85790	86707	-	PRK09482	71	180	2e-08	51.8	0.36	flap endonuclease-like protein; Provisional
.	gene_118	85790	86707	-	cd00008	15	180	5e-75	229	1	PIN domains of the 5'-3' exonucleases of DNA polymerase I, bacteriophage T4 RNase H and T5-5' nucleases, and homologs. PIN (PilT N terminus) domains of the 5'-3' exonucleases (53EXO) of mutli-domain DNA polymerase I and single domain protein homologs, as well as, the PIN domains of bacteriophage T5-5'nuclease (T5FEN or 5'-3'exonuclease), bacteriophage T4 RNase H (T4FEN), bacteriophage T3 (T3 phag…
.	gene_118	85790	86707	-	cd09852	43	171	1e-11	59.1	0.93	PIN (PilT N terminus) domain: Superfamily. PIN_SF The PIN (PilT N terminus) domain belongs to a large nuclease superfamily with representatives from eukaryota, eubacteria, and archaea. PIN domains were originally named for their sequence similarity to the N-terminal domain of an annotated pili biogenesis protein, PilT, a domain fusion between a PIN-domain and a PilT ATPase domain. The structural …
.	gene_118	85790	86707	-	cd09853	15	179	1e-66	207	0.98	PIN domains of structure-specific 5' nucleases (or flap endonuclease-1-like) involved in DNA replication, repair, and recombination. Structure-specific 5' nucleases are capable of both 5'-3' exonucleolytic activity and cleaving bifurcated or branched DNA, in an endonucleolytic, structure-specific manner. The family includes the PIN (PilT N terminus) domains of Flap Endonuclease-1 (FEN1), Exonucle…
.	gene_118	85790	86707	-	cd09859	59	176	6e-11	58.2	0.57	PIN domain of the 5'-3' exonuclease of Taq DNA polymerase I and homologs. The 5'-3' exonuclease (53EXO) PIN (PilT N terminus) domain of multi-domain DNA polymerase I and single domain protein homologs are included in this family. Taq contains a polymerase domain for synthesizing a new DNA strand and a 53EXO PIN domain for cleaving RNA primers or damaged DNA strands. Taq's 53EXO PIN domain recogni…
.	gene_118	85790	86707	-	cd09860	14	181	1e-68	212	0.95	PIN domain of bacteriophage T3, T4 RNase H, T5-5'nuclease, and homologs. PIN (PilT N terminus) domain of bacteriophage T5-5'nuclease (5'-3' exonuclease or T5FEN), bacteriophage T4 RNase H (T4FEN), bacteriophage T3 (T3 phage exodeoxyribonuclease) and other similar 5' nucleases are included in this family. T5-5'nuclease is a 5'-3'exodeoxyribonuclease that also exhibits endonucleolytic activity on f…
.	gene_118	85790	86707	-	cd09899	184	259	5e-12	59.4	0.84	H3TH domain of bacteriophage T3, T4 RNase H, T5-5' nucleases, and homologs. H3TH (helix-3-turn-helix) domains of bacteriophage T5-5'nuclease (5'-3' exonuclease or T5FEN), bacteriophage T4 RNase H (T4FEN), bacteriophage T3 (T3 phage exodeoxyribonuclease) and other similar 5' nucleases are included in this family. The T5-5'nuclease is a 5'-3' exodeoxyribonuclease that also exhibits endonucleolytic …
.	gene_118	85790	86707	-	smart00279	185	220	7e-08	43.6	1	Helix-hairpin-helix class 2 (Pol1 family) motifs.
.	gene_118	85790	86707	-	smart00475	58	206	2e-14	66.1	0.5	5'-3' exonuclease.
.	gene_122	91868	92518	+	PF03903.12	1	216	1.4e-87	292.8	1	Phage T4 tail fibre
.	gene_123	92527	95472	+	PF13884.5	869	925	5.8e-08	32.8	1	Chaperone of endosialidase
.	gene_124	95509	96291	+	PF05268.10	1	260	6.3e-126	419.3	1	Phage tail fibre adhesin Gp38
.	gene_126	96979	97251	-	PF09010.9	2	81	2.2e-42	142.9	1	Anti-Sigma Factor A
.	gene_137	100479	101807	-	COG0188	3	382	3e-55	194	0.45	DNA gyrase/topoisomerase IV, subunit A [Replication, recombination and repair].
.	gene_137	100479	101807	-	PF00521.19	27	429	3.7e-78	263.2	0.971831	DNA gyrase/topoisomerase IV, subunit A
.	gene_137	100479	101807	-	PRK05560	17	236	3e-21	94.3	0.25	DNA gyrase subunit A; Validated
.	gene_137	100479	101807	-	PRK05561	5	236	1e-33	132	0.29	DNA topoisomerase IV subunit A; Validated
.	gene_137	100479	101807	-	PRK09630	6	247	6e-23	98.8	0.48	DNA topoisomerase IV subunit A; Provisional
.	gene_137	100479	101807	-	PRK09631	7	247	9e-31	122	0.36	DNA topoisomerase IV subunit A; Provisional
.	gene_137	100479	101807	-	PRK12758	17	257	2e-21	95.1	0.26	DNA topoisomerase IV subunit A; Provisional
.	gene_137	100479	101807	-	PRK13979	17	195	1e-21	95.6	0.18	DNA topoisomerase IV subunit A; Provisional
.	gene_137	100479	101807	-	cd00187	27	405	5e-66	218	0.8	DNA Topoisomerase, subtype IIA; domain A'; bacterial DNA topoisomerase IV (C subunit, ParC), bacterial DNA gyrases (A subunit, GyrA),mammalian DNA toposiomerases II. DNA topoisomerases are essential enzymes that regulate the conformational changes in DNA topology by catalysing the concerted breakage and rejoining of DNA strands during normal cellular growth.
.	gene_137	100479	101807	-	smart00434	6	442	1e-142	413	0.98	DNA Topoisomerase IV. Bacterial DNA topoisomerase IV, GyrA, ParC
.	gene_139	102191	102649	-	PF06591.10	1	152	6.7e-97	321.3	1	T4-like phage nuclear disruption protein (Ndd)
.	gene_149	108211	110028	-	COG0187	6	603	4e-94	302	0.87	DNA gyrase/topoisomerase IV, subunit B [Replication, recombination and repair].
.	gene_149	108211	110028	-	PF02518.25	46	188	7.5e-14	52.1	0.945946	Histidine kinase-, DNA gyrase B-, and HSP90-like ATPase
.	gene_149	108211	110028	-	PRK05559	6	603	3e-79	263	0.85	DNA topoisomerase IV subunit B; Reviewed
.	gene_149	108211	110028	-	PRK05644	4	601	1e-53	193	0.8	DNA gyrase subunit B; Validated
.	gene_149	108211	110028	-	PRK14939	6	532	2e-39	152	0.6	DNA gyrase subunit B; Provisional
.	gene_149	108211	110028	-	cd00075	48	185	2e-07	48.4	0.95	Histidine kinase-like ATPases; This family includes several ATP-binding proteins for example: histidine kinase, DNA gyrase B, topoisomerases, heat shock protein HSP90, phytochrome-like ATPases and DNA mismatch repair proteins
.	gene_149	108211	110028	-	cd00822	265	374	3e-10	57.6	0.59	TopoIIA_Trans_DNA_gyrase: Transducer domain, having a ribosomal S5 domain 2-like fold, of the type found in proteins of the type IIA family of DNA topoisomerases similar to the B subunits of E. coli DNA gyrase and E. coli Topoisomerase IV which are heterodimers composed of two subunits. The type IIA enzymes are the predominant form of topoisomerase and are found in some bacteriophages, viruses an…
.	gene_149	108211	110028	-	cd01030	409	515	7e-30	113	0.93	TOPRIM_TopoIIA_like: topoisomerase-primase (TOPRIM) nucleotidyl transferase/hydrolase domain of the type found in proteins of the type IIA family of DNA topoisomerases similar to Saccharomyces cerevisiae Topoisomerase II. TopoIIA enzymes cut both strands of the duplex DNA to remove (relax) both positive and negative supercoils in DNA. These enzymes covalently attach to the 5' ends of the cut DNA,…
.	gene_149	108211	110028	-	cd03365	410	510	1e-18	81.6	0.84	TOPRIM_TopoIIA: topoisomerase-primase (TOPRIM) nucleotidyl transferase/hydrolase domain of the type found in proteins of the type IIA family of DNA topoisomerases similar to Saccharomyces cerevisiae Topoisomerase II. TopoIIA enzymes cut both strands of the duplex DNA to remove (relax) both positive and negative supercoils in DNA. These enzymes covalently attach to the 5' ends of the cut DNA, sepa…
.	gene_149	108211	110028	-	cd03366	411	521	1e-18	81.5	0.96	TOPRIM_TopoIIA_GyrB: topoisomerase-primase (TOPRIM) nucleotidyl transferase/hydrolase domain of the type found in proteins of the type IIA family of DNA topoisomerases similar to the Escherichia coli GyrB subunit. TopoIIA enzymes cut both strands of the duplex DNA to remove (relax) both positive and negative supercoils in DNA. These enzymes covalently attach to the 5' ends of the cut DNA, separat…
.	gene_149	108211	110028	-	cd03481	230	339	2e-20	88.1	0.72	TopoIIA_Trans_ScTopoIIA: Transducer domain, having a ribosomal S5 domain 2-like fold, of the type found in proteins of the type IIA family of DNA topoisomerases similar to Saccharomyces cerevisiae Topo IIA. S. cerevisiae Topo IIA is a homodimer encoded by a single gene. The type IIA enzymes are the predominant form of topoisomerase and are found in some bacteriophages, viruses and archaea, and in…
.	gene_149	108211	110028	-	smart00387	47	189	2e-08	47.3	0.9	Histidine kinase-like ATPases. Histidine kinase-, DNA gyrase B-, phytochrome-like ATPases.
.	gene_149	108211	110028	-	smart00433	47	605	8e-101	316	0.91	TopoisomeraseII. Eukaryotic DNA topoisomerase II, GyrB, ParE
.	gene_152	110738	110914	-	COG2331	1	53	7e-05	34.1	0.63	Predicted nucleic acid-binding protein, contains Zn-ribbon domain [General function prediction only].
.	gene_152	110738	110914	-	PF09723.9	1	38	8.8e-12	44.9	0.875	Zinc ribbon domain
.	gene_152	110738	110914	-	TIGR02605	1	45	8.3e-12	43	0.846154	CxxC_CxxC_SSSS: putative regulatory protein, FmdB family
.	gene_152	110738	110914	-	smart00834	1	43	2e-12	51.8	1	Putative regulatory protein. CxxC_CXXC_SSSS represents a region of about 41 amino acids found in a number of small proteins in a wide range of bacteria. The region usually begins with the initiator Met and contains two CxxC motifs separated by 17 amino acids. One protein in this entry has been noted as a putative regulatory protein, designated FmdB. Most proteins in this entry have a C-terminal r…
.	gene_158	113398	114081	-	PF16473.4	4	164	1.1e-19	70.9	0.76506	3' exoribonuclease, RNase T-like
.	gene_158	113398	114081	-	cd06127	5	192	2e-05	41.1	0.92	DEDDh 3'-5' exonuclease domain family. DEDDh exonucleases, part of the DnaQ-like (or DEDD) exonuclease superfamily, catalyze the excision of nucleoside monophosphates at the DNA or RNA termini in the 3'-5' direction. These proteins contain four invariant acidic residues in three conserved sequence motifs termed ExoI, ExoII and ExoIII. DEDDh exonucleases are classified as such because of the prese…
.	gene_161	114583	115902	-	COG0507	32	436	6e-19	86.8	0.46	ATP-dependent exoDNAse (exonuclease V), alpha subunit, helicase superfamily I [Replication, recombination and repair].
.	gene_161	114583	115902	-	PF13604.5	6	194	8.7e-26	90.7	0.895833	AAA domain
.	gene_161	114583	115902	-	PRK10875	30	153	3e-08	53.4	0.18	exonuclease V subunit alpha; Provisional
.	gene_161	114583	115902	-	PRK13709	5	153	3e-06	47.5	0.08	conjugal transfer nickase/helicase TraI; Provisional
.	gene_161	114583	115902	-	smart00382	24	129	3e-07	43.9	0.67	ATPases associated with a variety of cellular activities. AAA - ATPases associated with a variety of cellular activities. This profile/alignment only detects a fraction of this vast family. The poorly conserved N-terminal helix is missing from the alignment.
.	gene_161	114583	115902	-	smart00487	1	140	4e-07	44.4	0.68	DEAD-like helicases superfamily.
.	gene_174	121184	121702	-	cd11527	35	172	1e-08	48	1	Nucleoside Triphosphate Pyrophosphohydrolase (EC 3.6.1.8) MazG-like domain found in dimeric 2-Deoxyuridine 5'-triphosphate nucleotidohydrolase and similar proteins. dUTPase (dUTP pyrophosphatase; EC 3.6.1.23) catalyzes the hydrolysis of dUTP to dUMP and pyrophosphate. It acts to ensure chromosomal integrity by reducing the effective ratio of dUTP/dTTP. Members in this family are dimeric dUTPases,…
.	gene_175	121763	122542	-	COG0338	7	257	1e-30	114	0.89	Site-specific DNA-adenine methylase [Replication, recombination and repair].
.	gene_175	121763	122542	-	PF02086.14	7	237	4.2e-49	167.5	0.976923	D12 class N6 adenine-specific DNA methyltransferase
.	gene_175	121763	122542	-	PRK10904	7	174	2e-16	74.4	0.62	DNA adenine methylase; Provisional
.	gene_175	121763	122542	-	TIGR00571	1	259	3.6e-70	234.6	1	dam: DNA adenine methylase
.	gene_178	123400	124428	-	COG0358	64	314	9e-07	47.5	0.42	DNA primase (bacterial type) [Replication, recombination and repair].
.	gene_178	123400	124428	-	PF08275.10	178	209	0.00017	21.5	0.25	DNA primase catalytic core, N-terminal domain
.	gene_179	124431	124595	-	PF07068.10	3	39	9e-06	24.6	0.0726916	Major capsid protein Gp23
.	gene_184	126077	127504	-	COG0305	53	382	1e-11	63.4	0.72	Replicative DNA helicase [Replication, recombination and repair].
.	gene_184	126077	127504	-	PF03796.14	174	409	1e-16	61	0.917647	DnaB-like helicase C terminal domain
.	gene_184	126077	127504	-	PRK06749	179	403	8e-05	42.6	0.5	replicative DNA helicase; Provisional
.	gene_184	126077	127504	-	cd00984	179	382	3e-11	61	0.79	DnaB helicase C terminal domain. The hexameric helicase DnaB unwinds the DNA duplex at the chromosome replication fork. Although the mechanism by which DnaB both couples ATP hydrolysis to translocation along DNA and denatures the duplex is unknown, a change in the quaternary structure of the protein involving dimerization of the N-terminal domain has been observed and may occur during the enzymat…
.	gene_184	126077	127504	-	cd01122	170	408	5e-08	52	0.84	GP4d_helicase is a homohexameric 5'-3' helicases. Helicases couple NTP hydrolysis to the unwinding of nucleic acid duplexes into their component strands.
.	gene_185	127514	127858	-	PF11113.7	44	99	2.9e-26	91.2	1	Head assembly gene product
.	gene_186	127851	129032	-	COG0468	11	282	2e-12	64.2	0.91	RecA/RadA recombinase [Replication, recombination and repair].
.	gene_186	127851	129032	-	PF00154.20	42	268	3.5e-11	43	0.855513	recA bacterial DNA recombination protein
.	gene_186	127851	129032	-	PRK09519	38	273	2e-09	57	0.28	DNA recombination protein RecA; Reviewed
.	gene_186	127851	129032	-	cd00983	87	292	1e-11	63	0.6	RecA is a bacterial enzyme which has roles in homologous recombination, DNA repair, and the induction of the SOS response. RecA couples ATP hydrolysis to DNA strand exchange.
.	gene_186	127851	129032	-	cd01393	43	232	4e-06	45.3	0.81	RecA is a bacterial enzyme which has roles in homologous recombination, DNA repair, and the induction of the SOS response. RecA couples ATP hydrolysis to DNA strand exchange. While prokaryotes have a single RecA protein, eukaryotes have multiple RecA homologs such as Rad51, DMC1 and Rad55/57. Archaea have the RecA-like homologs radA and radB.
.	gene_188	129949	130689	-	COG0207	27	222	1e-09	54.6	0.68	Thymidylate synthase [Nucleotide transport and metabolism].
.	gene_188	129949	130689	-	PF00303.18	25	232	9.5e-16	57.6	0.783582	Thymidylate synthase
.	gene_188	129949	130689	-	PRK00956	108	222	3e-05	41.5	0.48	thymidylate synthase; Provisional
.	gene_188	129949	130689	-	cd00351	27	222	8e-18	77.3	0.84	Thymidylate synthase and pyrimidine hydroxymethylase: Thymidylate synthase (TS) and deoxycytidylate hydroxymethylase (dCMP-HMase) are homologs that catalyze analogous alkylation of C5 of pyrimidine nucleotides. Both enzymes are involved in the biosynthesis of DNA precursors and are active as homodimers. However, they exhibit distinct pyrimidine base specificities and differ in the details of thei…
.	gene_189	130843	131094	-	PF14373.5	22	63	1.3e-14	53.7	1	Superinfection immunity protein
.	gene_192	131913	134609	-	COG0417	188	768	6e-39	152	0.58	DNA polymerase elongation subunit (family B) [Replication, recombination and repair].
.	gene_192	131913	134609	-	PF00136.20	366	768	1.1e-27	96.8	0.700431	DNA polymerase family B
.	gene_192	131913	134609	-	PRK05761	174	428	4e-10	61.2	0.28	DNA polymerase I; Reviewed
.	gene_192	131913	134609	-	PRK05762	188	770	3e-38	151	0.59	DNA polymerase II; Reviewed
.	gene_192	131913	134609	-	cd00145	386	782	3e-54	190	0.89	DNA polymerase type-B family catalytic domain. DNA-directed DNA polymerases elongate DNA by adding nucleotide triphosphate (dNTP) residues to the 5'-end of the growing chain of DNA. DNA-directed DNA polymerases are multifunctional with both synthetic (polymerase) and degradative modes (exonucleases) and play roles in the processes of DNA replication, repair, and recombination. DNA-dependent DNA p…
.	gene_192	131913	134609	-	cd05160	108	332	7e-34	129	0.98	DEDDy 3'-5' exonuclease domain of family-B DNA polymerases. The 3'-5' exonuclease domain of family-B DNA polymerases. This domain has a fundamental role in reducing polymerase errors and is involved in proofreading activity. Family-B DNA polymerases contain an N-terminal DEDDy DnaQ-like exonuclease domain in the same polypeptide chain as the polymerase domain, similar to family-A DNA polymerases.…
.	gene_192	131913	134609	-	cd05530	386	428	6e-06	47.3	0.12	DNA polymerase type-B B1 subfamily catalytic domain. Archaeal proteins that are involved in DNA replication are similar to those from eukaryotes. Some archaeal members also possess multiple family B DNA polymerases (B1, B2 and B3). So far there is no specific function(s) has been assigned for different members of the archaea type B DNA polymerases. Phylogenetic analyses of eubacterial, archaeal, …
.	gene_192	131913	134609	-	cd05531	390	500	8e-06	46.6	0.27	DNA polymerase type-B B2 subfamily catalytic domain. Archaeal proteins that are involved in DNA replication are similar to those from eukaryotes. Some archaeal members also possess multiple family B DNA polymerases (B1, B2 and B3). So far there is no specific function(s) has been assigned for different members of the archaea type B DNA polymerases. Phylogenetic analyses of eubacterial, archaeal, …
.	gene_192	131913	134609	-	cd05532	385	667	3e-07	51	0.49	DNA polymerase type-B alpha subfamily catalytic domain. Three DNA-dependent DNA polymerases type B (alpha, delta, and epsilon) have been identified as essential for nuclear DNA replication in eukaryotes. DNA polymerase (Pol) alpha is almost exclusively required for the initiation of DNA replication and the priming of Okazaki fragments during elongation. In most organisms no specific repair role, …
.	gene_192	131913	134609	-	cd05536	385	758	3e-13	70	0.69	DNA polymerase type-B B3 subfamily catalytic domain. Archaeal proteins that are involved in DNA replication are similar to those from eukaryotes. Some members of the archaea also possess multiple family B DNA polymerases (B1, B2 and B3). So far there is no specific function(s) has been assigned for different members of the archaea type B DNA polymerases. Phylogenetic analyses of eubacterial, arch…
.	gene_192	131913	134609	-	cd05537	386	776	1e-15	77.3	0.72	DNA polymerase type-II subfamily catalytic domain. Bacteria contain five DNA polymerases (I, II, III, IV and V). DNA polymerase II (Pol II) is a prototype for the B-family of polymerases. The role of Pol II in a variety of cellular activities, such as repair of DNA damaged by UV irradiation or oxidation has been proven by genetic studies. DNA polymerase III is the main enzyme responsible for repl…
.	gene_192	131913	134609	-	cd05777	186	293	1e-12	66.8	0.43	DEDDy 3'-5' exonuclease domain of eukaryotic DNA polymerase delta, a family-B DNA polymerase. The 3'-5' exonuclease domain of eukaryotic DNA polymerase delta. DNA polymerase delta is a family-B DNA polymerase with a catalytic subunit that contains a DEDDy-type DnaQ-like 3'-5' exonuclease domain. It is one of the three DNA-dependent type B DNA polymerases (alpha and epsilon are the other two) that…
.	gene_192	131913	134609	-	cd05778	113	293	3e-05	44.1	0.71	inactive DEDDy 3'-5' exonuclease domain of eukaryotic DNA polymerase zeta, a family-B DNA polymerase. The 3'-5' exonuclease domain of eukaryotic DNA polymerase zeta. DNA polymerase zeta is a family-B DNA polymerase which is distantly related to DNA polymerase delta. It plays a major role in translesion replication and the production of either spontaneous or induced mutations. In addition, DNA pol…
.	gene_192	131913	134609	-	cd05783	107	326	6e-12	64.3	0.87	DEDDy 3'-5' exonuclease domain of Sulfolobus solfataricus DNA polymerase B1 and similar archaeal family-B DNA polymerases. The 3'-5' exonuclease domain of Sulfolobus solfataricus DNA polymerase B1 and similar archaeal proteins. B1 is a family-B DNA polymerase. Family-B DNA polymerases contain an N-terminal DEDDy DnaQ-like exonuclease domain in the same polypeptide chain as the polymerase domain, …
.	gene_192	131913	134609	-	cd05784	188	328	2e-11	62.2	0.69	DEDDy 3'-5' exonuclease domain of Escherichia coli DNA polymerase II and similar bacterial family-B DNA polymerases. The 3'-5' exonuclease domain of Escherichia coli DNA polymerase II (Pol II) and similar bacterial proteins. Pol II is a family-B DNA polymerase. Family-B DNA polymerases contain an N-terminal DEDDy DnaQ-like exonuclease domain in the same polypeptide chain as the polymerase domain,…
.	gene_192	131913	134609	-	cd05785	191	331	6e-09	54.7	0.66	Uncharacterized bacterial subgroup of the DEDDy 3'-5' exonuclease domain of family-B DNA polymerases. A subfamily of the 3'-5' exonuclease domain of family-B DNA polymerases. This subfamily is composed of uncharacterized bacterial family-B DNA polymerases. Family-B DNA polymerases contain an N-terminal DEDDy DnaQ-like exonuclease domain in the same polypeptide chain as the polymerase domain, simi…
.	gene_192	131913	134609	-	smart00486	107	627	1e-66	226	0.93	DNA polymerase type-B family. DNA polymerase alpha, delta, epsilon and zeta chain (eukaryota), DNA polymerases in archaea, DNA polymerase II in e. coli, mitochondrial DNA polymerases and and virus DNA polymerases
.	gene_194	134911	135279	-	PF01818.16	1	121	1.2e-75	251.2	1	Bacteriophage translational regulator
.	gene_195	135281	135844	-	PF16790.4	37	173	1.3e-80	268.4	1	Bacteriophage clamp loader A subunit
.	gene_196	135846	136805	-	COG0470	126	275	2e-09	53.9	0.63	DNA polymerase III, delta prime subunit [Replication, recombination and repair].
.	gene_196	135846	136805	-	COG1222	25	194	1e-05	43.4	0.39	ATP-dependent 26S proteasome regulatory subunit [Posttranslational modification, protein turnover, chaperones].
.	gene_196	135846	136805	-	COG2256	16	237	4e-13	66.5	0.49	Replication-associated recombination protein RarA (DNA-dependent ATPase) [Replication, recombination and repair].
.	gene_196	135846	136805	-	COG2812	11	274	1e-08	53.2	0.46	DNA polymerase III, gamma/tau subunits [Replication, recombination and repair].
.	gene_196	135846	136805	-	PF00004.28	47	156	5.1e-14	52.7	0.962121	ATPase family associated with various cellular activities (AAA)
.	gene_196	135846	136805	-	PRK00440	6	218	1e-32	122	0.64	replication factor C small subunit; Reviewed
.	gene_196	135846	136805	-	PRK04132	57	213	1e-12	66	0.18	replication factor C small subunit; Provisional
.	gene_196	135846	136805	-	PRK04195	14	286	2e-19	86.1	0.52	replication factor C large subunit; Provisional
.	gene_196	135846	136805	-	PRK07133	11	61	3e-06	46.3	0.08	DNA polymerase III subunits gamma and tau; Validated
.	gene_196	135846	136805	-	PRK12402	14	313	3e-23	95.8	0.86	replication factor C small subunit 2; Reviewed
.	gene_196	135846	136805	-	PRK13342	11	232	5e-12	64	0.5	recombination factor protein RarA; Reviewed
.	gene_196	135846	136805	-	PRK14953	13	249	4e-11	61.4	0.47	DNA polymerase III subunits gamma and tau; Provisional
.	gene_196	135846	136805	-	PRK14962	11	273	7e-10	57.5	0.5	DNA polymerase III subunits gamma and tau; Provisional
.	gene_196	135846	136805	-	cd00009	30	155	8e-11	57.5	0.83	The AAA+ (ATPases Associated with a wide variety of cellular Activities) superfamily represents an ancient group of ATPases belonging to the ASCE (for additional strand, catalytic E) division of the P-loop NTPase fold. The ASCE division also includes ABC, RecA-like, VirD4-like, PilT-like, and SF1/2 helicases. Members of the AAA+ ATPases function as molecular chaperons, ATPase subunits of protease…
.	gene_196	135846	136805	-	smart00382	44	161	3e-08	46.2	0.8	ATPases associated with a variety of cellular activities. AAA - ATPases associated with a variety of cellular activities. This profile/alignment only detects a fraction of this vast family. The poorly conserved N-terminal helix is missing from the alignment.
.	gene_197	136857	137543	-	PF09116.9	115	222	2e-51	172.4	1	gp45 sliding clamp, C terminal
.	gene_200	138242	139882	-	COG0419	18	377	6e-22	97.1	0.37	DNA repair exonuclease SbcCD ATPase subunit [Replication, recombination and repair].
.	gene_200	138242	139882	-	COG0419	140	525	6e-10	59	0.41	DNA repair exonuclease SbcCD ATPase subunit [Replication, recombination and repair].
.	gene_200	138242	139882	-	COG1196	149	524	1e-06	48.2	0.3	Chromosome segregation ATPase [Cell cycle control, cell division, chromosome partitioning].
.	gene_200	138242	139882	-	PF13476.5	16	207	2.2e-10	41.3	0.785	AAA domain
.	gene_200	138242	139882	-	PRK01156	18	376	7e-09	56.4	0.4	chromosome segregation protein; Provisional
.	gene_200	138242	139882	-	PRK02224	18	376	3e-09	57.7	0.37	chromosome segregation protein; Provisional
.	gene_200	138242	139882	-	PRK03918	19	389	1e-08	55.8	0.39	chromosome segregation protein; Provisional
.	gene_200	138242	139882	-	cd00267	6	40	4e-05	41.8	0.23	ATP-binding cassette transporter nucleotide-binding domain. ABC transporters are a large family of proteins involved in the transport of a wide variety of different compounds, like sugars, ions, peptides, and more complex organic molecules. The nucleotide-binding domain shows the highest similarity between all members of the family. ABC transporters are a subset of nucleotide hydrolases that cont…
.	gene_200	138242	139882	-	cd03227	7	51	8e-07	47	0.28	ATP-binding cassette domain of non-transporter proteins. ABC-type Class 2 contains systems involved in cellular processes other than transport. These families are characterized by the fact that the ABC subunit is made up of duplicated, fused ABC modules (ABC2). No known transmembrane proteins or domains are associated with these proteins.
.	gene_200	138242	139882	-	cd03240	18	86	4e-07	48.4	0.34	ATP-binding cassette domain of Rad50. The catalytic domains of Rad50 are similar to the ATP-binding cassette of ABC transporters, but are not associated with membrane-spanning domains. The conserved ATP-binding motifs common to Rad50 and the ABC transporter family include the Walker A and Walker B motifs, the Q loop, a histidine residue in the switch region, a D-loop, and a conserved LSGG sequenc…
.	gene_200	138242	139882	-	cd03279	7	124	7e-10	56.9	0.41	ATP-binding cassette domain of sbcCD. SbcCD and other Mre11/Rad50 (MR) complexes are implicated in the metabolism of DNA ends. They cleave ends sealed by hairpin structures and are thought to play a role in removing protein bound to DNA termini.
.	gene_200	138242	139882	-	cd03279	419	538	4e-09	54.6	0.56	ATP-binding cassette domain of sbcCD. SbcCD and other Mre11/Rad50 (MR) complexes are implicated in the metabolism of DNA ends. They cleave ends sealed by hairpin structures and are thought to play a role in removing protein bound to DNA termini.
.	gene_201	139921	140127	-	PF17589.1	1	66	8.9e-40	134.7	1	Family of unknown function (DUF5487)
.	gene_203	140368	141387	-	COG0420	1	311	2e-10	58.7	0.78	DNA repair exonuclease SbcCD nuclease subunit [Replication, recombination and repair].
.	gene_203	140368	141387	-	PF00149.27	1	174	6.5e-07	30	0.622549	Calcineurin-like phosphoesterase
.	gene_203	140368	141387	-	cd00840	2	86	7e-08	49.6	0.46	Mre11 nuclease, N-terminal metallophosphatase domain. Mre11 (also known as SbcD in Escherichia coli) is a subunit of the MRX protein complex. This complex includes: Mre11, Rad50, and Xrs2/Nbs1, and plays a vital role in several nuclear processes including DNA double-strand break repair, telomere length maintenance, cell cycle checkpoint control, and meiotic recombination, in eukaryotes. During do…
.	gene_204	141564	142766	-	PF11440.7	14	368	1.4e-237	787.4	1	DNA alpha-glucosyltransferase
.	gene_207	143183	143500	-	PF10849.7	26	95	5.7e-43	144.9	1	Protein of unknown function (DUF2654)
.	gene_213	145204	145404	-	PF17593.1	1	62	2.1e-49	165.3	1	Family of unknown function (DUF5490)
.	gene_220	146810	147280	-	COG0602	10	145	3e-25	95.5	0.62	Organic radical activating enzyme [General function prediction only].
.	gene_220	146810	147280	-	COG1180	1	148	7e-08	47.3	0.52	Pyruvate-formate lyase-activating enzyme [Posttranslational modification, protein turnover, chaperones].
.	gene_220	146810	147280	-	PF13353.5	12	145	4.6e-46	156.4	0.992806	4Fe-4S single cluster domain
.	gene_220	146810	147280	-	PRK11121	1	143	3e-60	185	0.93	anaerobic ribonucleotide reductase-activating protein; Provisional
.	gene_220	146810	147280	-	PRK11145	6	52	1e-07	46.9	0.2	pyruvate formate lyase-activating enzyme 1; Provisional
.	gene_220	146810	147280	-	TIGR02491	2	148	1.4e-59	198.4	0.993506	NrdG: anaerobic ribonucleoside-triphosphate reductase activating protein
.	gene_220	146810	147280	-	cd01335	20	83	6e-06	42.3	0.32	Radical SAM superfamily. Enzymes of this family generate radicals by combining a 4Fe-4S cluster and S-adenosylmethionine (SAM) in close proximity. They are characterized by a conserved CxxxCxxC motif, which coordinates the conserved iron-sulfur cluster. Mechanistically, they share the transfer of a single electron from the iron-sulfur cluster to SAM, which leads to its reductive cleavage to methi…
.	gene_221	147277	149094	-	COG1328	3	604	0	672	0.84	Anaerobic ribonucleoside-triphosphate reductase [Nucleotide transport and metabolism].
.	gene_221	147277	149094	-	NF006732.0	2	604	1.8e-273	908.6	0.855337	PRK09263.1: anaerobic ribonucleoside-triphosphate reductase
.	gene_221	147277	149094	-	PF13597.5	21	604	1.1e-167	559.2	1	Anaerobic ribonucleoside-triphosphate reductase
.	gene_221	147277	149094	-	PRK07111	11	604	2e-131	404	0.78	anaerobic ribonucleoside triphosphate reductase; Provisional
.	gene_221	147277	149094	-	PRK08270	37	488	9e-20	91.1	0.55	anaerobic ribonucleoside triphosphate reductase; Provisional
.	gene_221	147277	149094	-	PRK08271	314	605	1e-07	52.3	0.4	anaerobic ribonucleoside triphosphate reductase; Provisional
.	gene_221	147277	149094	-	PRK09263	2	604	0	1047	0.84	anaerobic ribonucleoside triphosphate reductase; Provisional
.	gene_221	147277	149094	-	PRK14704	1	604	7e-126	386	0.95	anaerobic ribonucleoside triphosphate reductase; Provisional
.	gene_221	147277	149094	-	TIGR02487	20	604	2.3e-170	565.9	1	NrdD: anaerobic ribonucleoside-triphosphate reductase
.	gene_221	147277	149094	-	cd00576	51	538	9e-109	334	0.96	Ribonucleotide reductase and Pyruvate formate lyase. Ribonucleotide reductase (RNR) and pyruvate formate lyase (PFL) are believed to have diverged from a common ancestor. They have a structurally similar ten-stranded alpha-beta barrel domain that hosts the active site, and are radical enzymes. RNRs are found in all organisms and provide the only mechanism by which nucleotides are converted to deo…
.	gene_221	147277	149094	-	cd01675	21	584	0	656	0.94	Class III ribonucleotide reductase. Ribonucleotide reductase (RNR) catalyzes the reductive synthesis of deoxyribonucleotides from their corresponding ribonucleotides. It provides the precursors necessary for DNA synthesis. RNRs are separated into three classes based on their metallocofactor usage. Class I RNRs, found in eukaryotes, bacteria, and bacteriophage, use a diiron-tyrosyl radical. Class …
.	gene_222	149091	149564	-	PF09124.9	104	157	2.2e-33	114.1	1	T4 recombination endonuclease VII, dimerisation
.	gene_228	150931	151194	-	COG0695	13	87	4e-08	44.2	0.83	Glutaredoxin [Posttranslational modification, protein turnover, chaperones].
.	gene_228	150931	151194	-	PF00462.23	12	76	5.2e-08	32.9	0.9	Glutaredoxin
.	gene_228	150931	151194	-	PRK10638	14	82	1e-07	43.3	0.7	glutaredoxin 3; Provisional
.	gene_228	150931	151194	-	PRK11200	1	87	6e-05	35.8	0.84	glutaredoxin 1; Provisional
.	gene_228	150931	151194	-	cd02066	14	87	1e-09	49	0.88	Glutaredoxin (GRX) family; composed of GRX, approximately 10 kDa in size, and proteins containing a GRX or GRX-like domain. GRX is a glutathione (GSH) dependent reductase, catalyzing the disulfide reduction of target proteins such as ribonucleotide reductase. It contains a redox active CXXC motif in a TRX fold and uses a similar dithiol mechanism employed by TRXs for intramolecular disulfide bond…
.	gene_228	150931	151194	-	cd02976	14	80	2e-05	36.8	0.77	NrdH-redoxin (NrdH) family; NrdH is a small monomeric protein with a conserved redox active CXXC motif within a TRX fold, characterized by a glutaredoxin (GRX)-like sequence and TRX-like activity profile. In vitro, it displays protein disulfide reductase activity that is dependent on TRX reductase, not glutathione (GSH). It is part of the NrdHIEF operon, where NrdEF codes for class Ib ribonucleot…
.	gene_228	150931	151194	-	cd03029	14	86	7e-06	38.3	0.85	Glutaredoxin (GRX) family, PRX5 hybrid subfamily; composed of hybrid proteins containing peroxiredoxin (PRX) and GRX domains, which is found in some pathogenic bacteria and cyanobacteria. PRXs are thiol-specific antioxidant (TSA) proteins that confer a protective antioxidant role in cells through their peroxidase activity in which hydrogen peroxide, peroxynitrate, and organic hydroperoxides are r…
.	gene_228	150931	151194	-	cd03418	14	82	1e-10	51.4	0.79	Glutaredoxin (GRX) family, GRX bacterial class 1 and 3 (b_1_3)-like subfamily; composed of bacterial GRXs, approximately 10 kDa in size, and proteins containing a GRX or GRX-like domain. GRX is a glutathione (GSH) dependent reductase, catalyzing the disulfide reduction of target proteins such as ribonucleotide reductase. It contains a redox active CXXC motif in a TRX fold and uses a similar dithi…
.	gene_228	150931	151194	-	cd03419	14	87	3e-05	36.4	0.77	Glutaredoxin (GRX) family, GRX human class 1 and 2 (h_1_2)-like subfamily; composed of proteins similar to human GRXs, approximately 10 kDa in size, and proteins containing a GRX or GRX-like domain. GRX is a glutathione (GSH) dependent reductase, catalyzing the disulfide reduction of target proteins such as ribonucleotide reductase. It contains a redox active CXXC motif in a TRX fold and uses a s…
.	gene_239	158335	159345	-	PF10127.8	6	138	3.7e-13	49.5	0.506122	Predicted nucleotidyltransferase
.	gene_250	162853	163434	-	COG1435	1	191	8e-89	260	0.96	Thymidine kinase [Nucleotide transport and metabolism].
.	gene_250	162853	163434	-	NF003300.0	1	189	3.8e-80	267.6	0.984536	PRK04296.1-5: thymidine kinase
.	gene_250	162853	163434	-	PF00265.17	3	185	4.3e-62	209	0.99435	Thymidine kinase
.	gene_250	162853	163434	-	PRK04296	1	190	1e-96	280	0.99	thymidine kinase; Provisional
.	gene_255	164208	164675	-	COG2110	1	136	2e-16	70.5	0.74	O-acetyl-ADP-ribose deacetylase (regulator of RNase III), contains Macro domain [Translation, ribosomal structure and biogenesis].
.	gene_255	164208	164675	-	PF01661.20	22	134	5.5e-08	32.8	0.966102	Macro domain
.	gene_255	164208	164675	-	cd02901	1	140	4e-23	88.9	0.98	Macro domain, Poa1p_like family. The macro domain is a high-affinity ADP-ribose binding module found in a variety of proteins as a stand-alone domain or in combination with other domains like in histone macroH2A and some PARPs (poly ADP-ribose polymerases). Some macro domains recognize poly ADP-ribose as a ligand. Previously identified as displaying an Appr-1"-p (ADP-ribose-1"-monophosphate) proc…
.	gene_255	164208	164675	-	smart00506	2	137	2e-34	114	1	Appr-1"-p processing enzyme. Function determined by Martzen et al. Extended family detected by reciprocal PSI-BLAST searches (unpublished results, and Pehrson & Fuji).
.	gene_257	165006	165551	-	PF01464.19	61	153	7.9e-06	25.4	0.726496	Transglycosylase SLT domain
.	gene_257	165006	165551	-	cd00254	61	172	8e-05	38.2	0.92	Lytic Transglycosylase (LT) and Goose Egg White Lysozyme (GEWL) domain. Members include the soluble and insoluble membrane-bound LTs in bacteria, the LTs in bacteriophage lambda, as well as, the eukaryotic "goose-type" lysozymes (GEWL). LTs catalyze the cleavage of the beta-1,4-glycosidic bond between N-acetylmuramic acid (MurNAc) and N-acetyl-D-glucosamine (GlcNAc), as do "goose-type" lysozymes.…

## Sheet: ES21_Domains
Contig	Feature	Feature Start in Contig	Feature End in Contig	Feature Direction in Contig	Domain Accession	Domain Start in Feature	Domain End in Feature	E-value	Bit Score	Domain Coverage	Domain Description
NODE_1_length_167096_cov_338.28	gene_3	1295	1711	-	PF03013.13	1	135	2.3e-46	156.9	0.992308	Pyrimidine dimer DNA glycosylase
NODE_1_length_167096_cov_338.28	gene_4	1771	2265	-	PF00959.18	24	148	4.4e-25	88.1	1	Phage lysozyme
NODE_1_length_167096_cov_338.28	gene_4	1771	2265	-	cd00442	2	104	2e-25	93.9	0.92	lysozyme_like domain. This contains several members including Soluble Lytic Transglycosylases (SLT), Goose Egg-White Lysozymes (GEWL), Hen Egg-White Lysozymes (HEWL), chitinases, bacteriophage lambda lysozymes, endolysins, autolysins, and chitosanases. All the members are involved in the hydrolysis of beta-1,4- linked polysaccharides.
NODE_1_length_167096_cov_338.28	gene_4	1771	2265	-	cd00735	2	162	3e-95	274	0.99	Bacteriophage T4-like lysozymes hydrolyse the beta-1,4-glycosidic bond between N-acetylmuramic acid (MurNAc) and N-acetylglucosamine (GlcNAc) in peptidoglycan heteropolymers of prokaryotic cell walls. Members include a variety of bacteriophages (T4, RB49, RB69, Aeh1) as well as Dictyostelium.
NODE_1_length_167096_cov_338.28	gene_4	1771	2265	-	cd00737	11	138	3e-12	58.8	0.76	Endolysins and autolysins are found in viruses and bacteria, respectively. The ds DNA phages of eubacteria use endolysins or muralytic enzymes in conjunction with hollin, a small membrane protein, to degrade the peptidoglycan found in bacterial cell walls. Similarly, bacteria produce autolysins to facilitate the biosynthesis of its cell wall hetropolymer peptidoglycan and cell division. Both endo…
NODE_1_length_167096_cov_338.28	gene_5	2302	2742	-	COG0494	6	126	1e-07	45.6	0.71	8-oxo-dGTP pyrophosphatase MutT and related house-cleaning NTP pyrophosphohydrolases, NUDIX family [Defense mechanisms].
NODE_1_length_167096_cov_338.28	gene_5	2302	2742	-	PF00293.27	2	130	7e-14	51.9	0.931298	NUDIX domain
NODE_1_length_167096_cov_338.28	gene_5	2302	2742	-	cd02883	4	102	2e-10	52.9	0.74	Nudix hydrolase is a superfamily of enzymes found in all three kingdoms of life, and it catalyzes the hydrolysis of NUcleoside DIphosphates linked to other moieties, X. Enzymes belonging to this superfamily require a divalent cation, such as Mg2+ or Mn2+ for their activity. Members of this family are recognized by a highly conserved 23-residue nudix motif (GX5EX7REUXEEXGU, where U = I, L or V), w…
NODE_1_length_167096_cov_338.28	gene_5	2302	2742	-	cd03426	25	76	2e-05	39.8	0.29	Coenzyme A pyrophosphatase (CoAse), a member of the Nudix hydrolase superfamily, functions to catalyze the elimination of oxidized inactive CoA, which can inhibit CoA-utilizing enzymes. The need of CoAses mainly arises under conditions of oxidative stress. CoAse has a conserved Nudix fold and requires a single divalent cation for catalysis. In addition to a signature Nudix motif G[X5]E[X7]REUXEEX…
NODE_1_length_167096_cov_338.28	gene_5	2302	2742	-	cd03428	33	80	1e-07	45.3	0.34	Diadenosine tetraphosphate (Ap4A) hydrolase is a member of the Nudix hydrolase superfamily. Ap4A hydrolases are well represented in a variety of prokaryotic and eukaryotic organisms. Phylogenetic analysis reveals two distinct subgroups where plant enzymes fall into one subfamily and fungi/animals/archaea enzymes, represented by this subfamily, fall into another. Bacterial enzymes are found in bot…
NODE_1_length_167096_cov_338.28	gene_5	2302	2742	-	cd03673	35	75	4e-05	38.8	0.29	Diadenosine hexaphosphate (Ap6A) hydrolase is a member of the Nudix hydrolase superfamily. Ap6A hydrolase specifically hydrolyzes diadenosine polyphosphates, but not ATP or diadenosine triphosphate, and it generates ATP as the product. Ap6A, the most preferred substrate, hydrolyzes to produce two ATP molecules, which is a novel hydrolysis mode for Ap6A. These results indicate that Ap6A hydrolase …
NODE_1_length_167096_cov_338.28	gene_5	2302	2742	-	cd04662	4	83	2e-06	42.1	0.54	Members of the Nudix hydrolase superfamily catalyze the hydrolysis of NUcleoside DIphosphates linked to other moieties, X. Enzymes belonging to this superfamily require a divalent cation, such as Mg2+ or Mn2+, for their activity and contain a highly conserved 23-residue nudix motif (GX5EX7REUXEEXGU, where U = I, L or V), which functions as a metal binding and catalytic site. Substrates of nudix h…
NODE_1_length_167096_cov_338.28	gene_5	2302	2742	-	cd04666	22	99	2e-07	44.5	0.54	Members of the Nudix hydrolase superfamily catalyze the hydrolysis of NUcleoside DIphosphates linked to other moieties, X. Enzymes belonging to this superfamily require a divalent cation, such as Mg2+ or Mn2+, for their activity and contain a highly conserved 23-residue nudix motif (GX5EX7REUXEEXGU, where U = I, L or V), which functions as a metal binding and catalytic site. Substrates of nudix h…
NODE_1_length_167096_cov_338.28	gene_5	2302	2742	-	cd04700	5	62	5e-07	44.1	0.38	DR1025 from Deinococcus radiodurans, a member of the Nudix hydrolase superfamily, show nucleoside triphosphatase and dinucleoside polyphosphate pyrophosphatase activities. Like other enzymes belonging to this superfamily, it requires a divalent cation, in this case Mg2+, for its activity. It also contains a highly conserved 23-residue nudix motif (GX5EX7REUXEEXGU, where U = I, L or V), which func…
NODE_1_length_167096_cov_338.28	gene_22	11831	12361	-	PF06841.11	14	165	4.1e-17	62.2	0.992537	T4-like virus tail tube protein gp19
NODE_1_length_167096_cov_338.28	gene_25	13792	14382	+	PF11246.7	1	187	9.3e-91	302.5	1	Base plate wedge protein 53
NODE_1_length_167096_cov_338.28	gene_26	14366	16093	+	COG3772	184	323	4e-05	41.2	0.72	Phage-related lysozyme (muramidase), GH24 family [Cell wall/membrane/envelope biogenesis].
NODE_1_length_167096_cov_338.28	gene_26	14366	16093	+	PF06714.10	33	173	3.3e-65	218.6	1	Gp5 N-terminal OB domain
NODE_1_length_167096_cov_338.28	gene_26	14366	16093	+	cd00735	175	340	3e-106	318	1	Bacteriophage T4-like lysozymes hydrolyse the beta-1,4-glycosidic bond between N-acetylmuramic acid (MurNAc) and N-acetylglucosamine (GlcNAc) in peptidoglycan heteropolymers of prokaryotic cell walls. Members include a variety of bacteriophages (T4, RB49, RB69, Aeh1) as well as Dictyostelium.
NODE_1_length_167096_cov_338.28	gene_26	14366	16093	+	cd00737	178	304	3e-08	51.1	0.73	Endolysins and autolysins are found in viruses and bacteria, respectively. The ds DNA phages of eubacteria use endolysins or muralytic enzymes in conjunction with hollin, a small membrane protein, to degrade the peptidoglycan found in bacterial cell walls. Similarly, bacteria produce autolysins to facilitate the biosynthesis of its cell wall hetropolymer peptidoglycan and cell division. Both endo…
NODE_1_length_167096_cov_338.28	gene_28	16623	16916	+	PF05488.12	13	88	1.6e-06	28.1	0.971429	PAAR motif
NODE_1_length_167096_cov_338.28	gene_28	16623	16916	+	cd14737	2	97	4e-29	100	1	proline-alanine-alanine-arginine (PAAR) domain. This domain is found in the PAAR (proline-alanine-alanine-arginine) repeat family, where it forms a sharp conical extension on the VgrG spike, a trimeric protein complex of the bacterial type VI secretion system (T6SS). The T6SS is responsible for translocation of a wide variety of toxic effector molecules, allowing predatory cells to kill prokaryot…
NODE_1_length_167096_cov_338.28	gene_30	18904	22002	+	cd00063	8	102	6e-05	41.7	0.93	Fibronectin type 3 domain; One of three types of internal repeats found in the plasma protein fibronectin. Its tenth fibronectin type III repeat contains an RGD cell recognition sequence in a flexible loop between 2 strands. Approximately 2% of all animal proteins contain the FN3 repeat; including extracellular and intracellular proteins, membrane spanning cytokine receptors, growth hormone recep…
NODE_1_length_167096_cov_338.28	gene_32	23063	23929	+	PF07880.10	7	271	1.4e-116	389	0.996491	Bacteriophage T4 gp9/10-like protein
NODE_1_length_167096_cov_338.28	gene_33	23929	25734	+	PF07880.10	2	264	9.7e-102	340.3	0.996491	Bacteriophage T4 gp9/10-like protein
NODE_1_length_167096_cov_338.28	gene_35	26390	27940	+	COG4675	336	406	2e-08	51	0.42	Microcystin-dependent protein (function unknown) [Function unknown].
NODE_1_length_167096_cov_338.28	gene_35	26390	27940	+	PF14928.5	403	514	2.7e-39	134.1	0.941667	Short tail fibre protein receptor-binding domain
NODE_1_length_167096_cov_338.28	gene_36	27950	29407	+	PF07921.11	371	481	1.2e-34	118.2	0.989247	Fibritin C-terminal region
NODE_1_length_167096_cov_338.28	gene_38	30370	31140	+	PF11649.7	3	249	1.8e-135	450.6	0.928058	Virus neck protein
NODE_1_length_167096_cov_338.28	gene_39	31182	32000	+	PF16724.4	1	234	9.7e-144	477	1	T4-like virus Myoviridae tail sheath stabiliser
NODE_1_length_167096_cov_338.28	gene_40	32009	32503	+	PF11053.7	1	149	1.6e-87	291.2	1	Terminase DNA packaging enzyme
NODE_1_length_167096_cov_338.28	gene_41	32487	34319	+	PF17289.1	399	572	1.7e-44	151.5	0.987097	Terminase RNaseH-like domain
NODE_1_length_167096_cov_338.28	gene_42	34351	36330	+	COG3497	405	645	7e-08	52	0.6	Phage tail sheath protein FI [Mobilome: prophages, transposons].
NODE_1_length_167096_cov_338.28	gene_42	34351	36330	+	PF04984.13	348	541	1.9e-46	157.9	1	Phage tail sheath protein subtilisin-like domain
NODE_1_length_167096_cov_338.28	gene_43	36447	36938	+	PF06841.11	19	163	1.5e-17	63.6	0.985075	T4-like virus tail tube protein gp19
NODE_1_length_167096_cov_338.28	gene_44	37022	38596	+	PF07230.10	6	508	0	1045.7	1	Bacteriophage T4-like capsid assembly protein (Gp20)
NODE_1_length_167096_cov_338.28	gene_47	39260	39898	+	PF03420.12	6	190	2.1e-116	386	1	Prohead core protein serine protease
NODE_1_length_167096_cov_338.28	gene_49	40757	42322	+	PF07068.10	9	501	2.5e-303	1006.3	1	Major capsid protein Gp23
NODE_1_length_167096_cov_338.28	gene_50	42406	43689	+	PF07068.10	143	232	7.2e-09	34.8	0.178782	Major capsid protein Gp23
NODE_1_length_167096_cov_338.28	gene_51	43719	44723	-	PF09414.9	29	227	2.9e-24	86.1	0.993789	RNA ligase
NODE_1_length_167096_cov_338.28	gene_51	43719	44723	-	TIGR02307	2	334	3.3e-139	461.9	1	RNA_lig_RNL2: RNA ligase, Rnl2 family
NODE_1_length_167096_cov_338.28	gene_53	45015	45200	-	PF11242.7	1	60	2.6e-29	101.1	0.936508	Protein of unknown function (DUF2774)
NODE_1_length_167096_cov_338.28	gene_56	47470	48981	+	COG1061	118	458	1e-30	121	0.75	Superfamily II DNA or RNA helicase [Transcription, Replication, recombination and repair].
NODE_1_length_167096_cov_338.28	gene_56	47470	48981	+	COG1111	113	240	2e-08	53.5	0.24	ERCC4-related helicase [Replication, recombination and repair].
NODE_1_length_167096_cov_338.28	gene_56	47470	48981	+	COG1204	118	248	9e-09	55.1	0.17	Replicative superfamily II helicase [Replication, recombination and repair].
NODE_1_length_167096_cov_338.28	gene_56	47470	48981	+	COG4096	99	457	5e-10	59	0.4	Type I site-specific restriction endonuclease, part of a restriction-modification system [Defense mechanisms].
NODE_1_length_167096_cov_338.28	gene_56	47470	48981	+	PF04851.14	128	261	2.5e-14	53.6	0.847953	Type III restriction enzyme, res subunit
NODE_1_length_167096_cov_338.28	gene_56	47470	48981	+	PRK13766	136	240	1e-06	49.1	0.13	Hef nuclease; Provisional
NODE_1_length_167096_cov_338.28	gene_56	47470	48981	+	cd00046	130	263	4e-11	59.7	0.94	DEAD-like helicases superfamily. A diverse family of proteins involved in ATP-dependent RNA or DNA unwinding. This domain contains the ATP-binding region.
NODE_1_length_167096_cov_338.28	gene_56	47470	48981	+	cd00079	331	448	4e-11	59.6	0.89	Helicase superfamily c-terminal domain; associated with DEXDc-, DEAD-, and DEAH-box proteins, yeast initiation factor 4A, Ski2p, and Hepatitis C virus NS3 helicases; this domain is found in a wide variety of helicases and helicase related proteins; may not be an autonomously folding unit, but an integral part of the helicase; 4 helicase superfamilies at present according to the organization of th…
NODE_1_length_167096_cov_338.28	gene_56	47470	48981	+	smart00487	110	281	5e-18	77.1	0.85	DEAD-like helicases superfamily.
NODE_1_length_167096_cov_338.28	gene_56	47470	48981	+	smart00490	366	444	2e-08	46.8	0.96	helicase superfamily c-terminal domain.
NODE_1_length_167096_cov_338.28	gene_57	49007	49237	+	PF11637.7	21	74	1.9e-30	104.6	1	ATP-dependant DNA helicase UvsW
NODE_1_length_167096_cov_338.28	gene_58	49293	49460	-	PF10886.7	3	55	1e-34	118.4	1	Protein of unknown function (DUF2685)
NODE_1_length_167096_cov_338.28	gene_60	49713	50126	-	PF11056.7	9	137	5.2e-50	169	1	Recombination, repair and ssDNA binding protein UvsY
NODE_1_length_167096_cov_338.28	gene_61	50193	50591	-	COG3628	28	100	7e-10	50.5	0.63	Phage baseplate assembly protein W [Mobilome: prophages, transposons].
NODE_1_length_167096_cov_338.28	gene_61	50193	50591	-	PF04965.13	30	116	3.3e-16	58.7	0.947368	Gene 25-like lysozyme
NODE_1_length_167096_cov_338.28	gene_62	50591	51217	-	PF12322.7	4	206	8.3e-71	237.6	1	T4 bacteriophage base plate protein
NODE_1_length_167096_cov_338.28	gene_63	51268	52020	+	PF12322.7	5	201	5.5e-65	218.6	1	T4 bacteriophage base plate protein
NODE_1_length_167096_cov_338.28	gene_65	53212	53670	+	PF11110.7	1	151	2.7e-106	351.9	0.980519	Baseplate hub distal subunit
NODE_1_length_167096_cov_338.28	gene_67	55448	56542	+	PF11091.7	5	358	5.3e-160	532	0.994253	Tail-tube assembly protein
NODE_1_length_167096_cov_338.28	gene_68	56542	57507	+	PF06841.11	155	247	2.8e-05	23.9	0.61194	T4-like virus tail tube protein gp19
NODE_1_length_167096_cov_338.28	gene_70	57886	59943	-	PF03496.13	410	617	2.1e-24	85.9	0.898477	ADP-ribosyltransferase exoenzyme
NODE_1_length_167096_cov_338.28	gene_70	57886	59943	-	cd00233	417	622	5e-15	72.8	0.78	VIP2; A family of actin-ADP-ribosylating toxin. A member of the Bacillus-prodiced vegetative insecticidal proteins (VIPs) possesses high specificity against the major insect pest, corn rootworms, and belongs to a classs of binary toxins and regulators of biological pathways distinct from classical A-B toxins. A novel family of insecticidal ADP-ribosyltransferses were isolated from Bacillus cereus…
NODE_1_length_167096_cov_338.28	gene_71	59947	61995	-	PF03496.13	374	615	1e-57	194.6	1	ADP-ribosyltransferase exoenzyme
NODE_1_length_167096_cov_338.28	gene_71	59947	61995	-	cd00233	381	612	3e-49	170	0.92	VIP2; A family of actin-ADP-ribosylating toxin. A member of the Bacillus-prodiced vegetative insecticidal proteins (VIPs) possesses high specificity against the major insect pest, corn rootworms, and belongs to a classs of binary toxins and regulators of biological pathways distinct from classical A-B toxins. A novel family of insecticidal ADP-ribosyltransferses were isolated from Bacillus cereus…
NODE_1_length_167096_cov_338.28	gene_73	62233	63696	-	COG1793	134	472	4e-18	83.6	0.69	ATP-dependent DNA ligase [Replication, recombination and repair].
NODE_1_length_167096_cov_338.28	gene_73	62233	63696	-	PF01068.20	135	367	5.1e-44	150.3	1	ATP dependent DNA ligase domain
NODE_1_length_167096_cov_338.28	gene_73	62233	63696	-	PRK01109	124	411	4e-06	47.3	0.41	ATP-dependent DNA ligase; Provisional
NODE_1_length_167096_cov_338.28	gene_73	62233	63696	-	PRK09125	277	412	2e-06	47.2	0.45	DNA ligase; Provisional
NODE_1_length_167096_cov_338.28	gene_73	62233	63696	-	cd07896	136	367	5e-09	53.3	0.97	Adenylation domain of kDNA ligases and similar proteins. The mitochondrial DNA of parasitic protozoans is highly unusual. It is termed the kinetoplast DNA (kDNA) and consists of circular DNA molecules (maxicircles) and several thousand smaller circular molecules (minicircles). This group is composed of kDNA ligase, Chlorella virus DNA ligase, and similar proteins. kDNA ligase and Chlorella virus …
NODE_1_length_167096_cov_338.28	gene_73	62233	63696	-	cd07901	298	367	7e-06	44.8	0.34	Adenylation domain of archaeal and bacterial LigB-like DNA ligases. ATP-dependent polynucleotide ligases catalyze phosphodiester bond formation using nicked nucleic acid substrates with the high energy nucleotide of ATP as a cofactor in a three step reaction mechanism. DNA ligases play a vital role in the diverse processes of DNA replication, recombination and repair. ATP-dependent ligases are pr…
NODE_1_length_167096_cov_338.28	gene_73	62233	63696	-	cd07903	136	367	1e-05	44.5	0.88	Adenylation domain of DNA Ligase IV. ATP-dependent polynucleotide ligases catalyze phosphodiester bond formation using nicked nucleic acid substrates with the high energy nucleotide of ATP as a cofactor in a three step reaction mechanism. DNA ligases play a vital role in the diverse processes of DNA replication, recombination and repair. ATP-dependent ligases are present in many organisms such as…
NODE_1_length_167096_cov_338.28	gene_73	62233	63696	-	cd07905	159	233	2e-05	43	0.32	Adenylation domain of Mycobacterium tuberculosis LigC-like ATP-dependent DNA ligases. Bacterial DNA ligases are divided into two broad classes: NAD-dependent and ATP-dependent. All bacterial species have a NAD-dependent DNA ligase (LigA). Some bacterial genomes contain multiple genes for DNA ligases that are predicted to use ATP as their cofactor, including Mycobacterium tuberculosis LigB, LigC, …
NODE_1_length_167096_cov_338.28	gene_76	64813	65271	-	PF08010.10	11	150	3.6e-70	234	1	Bacteriophage protein GP30.3
NODE_1_length_167096_cov_338.28	gene_76	64813	65271	-	cd15457	8	123	5e-05	38.7	0.69	Escherichia coli swarming motility protein YbiA and related proteins. This family of uncharacterized domains was initially classified as Domain of Unknown Function (DUF1768). It contains members such as the E. coli swarming motility protein YbiA. Mutations in YbiA cause defects in Escherichia coli swarming, but not necessarily in motility. More recently, this family has been predicted to be invol…
NODE_1_length_167096_cov_338.28	gene_81	66426	66758	-	PF06019.10	1	110	4.7e-57	191.1	1	Phage GP30.8 protein
NODE_1_length_167096_cov_338.28	gene_84	67686	68021	-	PF00166.20	8	110	3e-15	55.9	1	Chaperonin 10 Kd subunit
NODE_1_length_167096_cov_338.28	gene_84	67686	68021	-	cd00320	8	110	2e-07	43.3	0.93	Chaperonin 10 Kd subunit (cpn10 or GroES); Cpn10 cooperates with chaperonin 60 (cpn60 or GroEL), an ATPase, to assist the folding and assembly of proteins and is found in eubacterial cytosol, as well as in the matrix of mitochondria and chloroplasts. It forms heptameric rings with a dome-like structure, forming a lid to the large cavity of the tetradecameric cpn60 cylinder and thereby tightly reg…
NODE_1_length_167096_cov_338.28	gene_85	68079	68387	-	PF10902.7	13	86	4.9e-19	68.4	0.986486	WYL_2, Sm-like SH3 beta-barrel fold
NODE_1_length_167096_cov_338.28	gene_87	68624	69205	-	COG0117	24	183	2e-14	65	0.68	Pyrimidine deaminase domain of riboflavin biosynthesis protein RibD [Coenzyme transport and metabolism].
NODE_1_length_167096_cov_338.28	gene_87	68624	69205	-	COG0590	104	168	9e-15	66.2	0.43	tRNA(Arg) A34 adenosine deaminase TadA [Translation, ribosomal structure and biogenesis].
NODE_1_length_167096_cov_338.28	gene_87	68624	69205	-	COG2131	1	179	3e-41	137	0.91	Deoxycytidylate deaminase [Nucleotide transport and metabolism].
NODE_1_length_167096_cov_338.28	gene_87	68624	69205	-	PF00383.22	3	151	6.6e-38	128.6	0.970297	Cytidine and deoxycytidylate deaminase zinc-binding region
NODE_1_length_167096_cov_338.28	gene_87	68624	69205	-	PRK10786	102	148	5e-06	43.6	0.12	bifunctional diaminohydroxyphosphoribosylaminopyrimidine deaminase/5-amino-6-(5-phosphoribosylamino)uracil reductase; Provisional
NODE_1_length_167096_cov_338.28	gene_87	68624	69205	-	PRK10860	104	149	3e-05	40.6	0.25	tRNA-specific adenosine deaminase; Provisional
NODE_1_length_167096_cov_338.28	gene_87	68624	69205	-	cd00786	102	145	4e-10	52.6	0.45	Cytidine and deoxycytidylate deaminase zinc-binding region. The family contains cytidine deaminases, nucleoside deaminases, deoxycytidylate deaminases and riboflavin deaminases. Also included are the apoBec family of mRNA editing enzymes. All members are Zn dependent. The zinc ion in the active site plays a central role in the proposed catalytic mechanism, activating a water molecule to form a hy…
NODE_1_length_167096_cov_338.28	gene_87	68624	69205	-	cd01284	104	168	3e-12	59.2	0.54	Riboflavin-specific deaminase. Riboflavin biosynthesis protein RibD (Diaminohydroxyphosphoribosylaminopyrimidine deaminase) catalyzes the deamination of 2,5-diamino-6-ribosylamino-4(3H)-pyrimidinone 5'-phosphate, which is an intermediate step in the biosynthesis of riboflavin.The ribG gene of Bacillus subtilis and the ribD gene of E. coli are bifunctional and contain this deaminase domain and a r…
NODE_1_length_167096_cov_338.28	gene_87	68624	69205	-	cd01285	104	152	1e-13	62.6	0.45	Nucleoside deaminases include adenosine, guanine and cytosine deaminases. These enzymes are Zn dependent and catalyze the deamination of nucleosides. The zinc ion in the active site plays a central role in the proposed catalytic mechanism, activating a water molecule to form a hydroxide ion that performs a nucleophilic attack on the substrate. The functional enzyme is a homodimer. Cytosine deamin…
NODE_1_length_167096_cov_338.28	gene_87	68624	69205	-	cd01286	7	165	2e-54	170	0.97	Deoxycytidylate deaminase domain. Deoxycytidylate deaminase catalyzes the deamination of dCMP to dUMP, providing the nucleotide substrate for thymidylate synthase. The enzyme binds Zn++, which is required for catalytic activity. The activity of the enzyme is allosterically regulated by the ratio of dCTP to dTTP not only in eukaryotic cells but also in T-even phage-infected Escherichia coli, with …
NODE_1_length_167096_cov_338.28	gene_94	71025	71930	-	COG0241	156	224	8e-05	40	0.37	Histidinol phosphatase or a related phosphatase [Amino acid transport and metabolism].
NODE_1_length_167096_cov_338.28	gene_94	71025	71930	-	COG0563	3	130	7e-07	45.7	0.7	Adenylate kinase or related kinase [Nucleotide transport and metabolism].
NODE_1_length_167096_cov_338.28	gene_94	71025	71930	-	COG0645	3	123	3e-06	43.9	0.7	Predicted kinase [General function prediction only].
NODE_1_length_167096_cov_338.28	gene_94	71025	71930	-	COG4088	2	145	7e-05	40.6	0.52	tRNA Uridine 5-carbamoylmethylation protein Kti12 (Killer toxin insensitivity protein) [Translation, ribosomal structure and biogenesis].
NODE_1_length_167096_cov_338.28	gene_94	71025	71930	-	COG4639	2	150	1e-14	67.9	0.83	Predicted kinase [General function prediction only].
NODE_1_length_167096_cov_338.28	gene_94	71025	71930	-	PF13671.5	6	146	1.2e-20	74.1	0.965035	AAA domain
NODE_1_length_167096_cov_338.28	gene_94	71025	71930	-	cd01427	161	296	8e-07	45.1	1	Haloacid dehalogenase-like hydrolases. The haloacid dehalogenase-like (HAD) superfamily includes L-2-haloacid dehalogenase, epoxide hydrolase, phosphoserine phosphatase, phosphomannomutase, phosphoglycolate phosphatase, P-type ATPase, and many others. This superfamily includes a variety of enzymes that catalyze the cleavage of substrate C-Cl, P-C, and P-OP bonds via nucleophilic substitution path…
NODE_1_length_167096_cov_338.28	gene_94	71025	71930	-	cd07502	159	301	1e-65	204	0.94	C-terminal phosphatase domain of T4 polynucleotide kinase/phosphatase (PNKP) and related phosphatases. This family includes the C-terminal domain of the bifunctional enzyme T4 polynucleotide kinase/phosphatase, PNKP. The PNKP phosphatase domain can catalyze the hydrolytic removal of the 3'-phosphoryl of DNA, RNA and deoxynucleoside 3'-monophosphates. This family belongs to the haloacid dehalogena…
NODE_1_length_167096_cov_338.28	gene_99	73111	73617	-	PF17527.1	2	167	3.7e-95	316.1	0.994012	Phage ALP protein
NODE_1_length_167096_cov_338.28	gene_100	73679	74803	-	PF09511.9	52	246	4.3e-24	85.5	1	RNA ligase
NODE_1_length_167096_cov_338.28	gene_100	73679	74803	-	TIGR02308	2	374	4.5e-191	632.8	1	RNA_lig_T4_1: RNA ligase, T4 RnlA family
NODE_1_length_167096_cov_338.28	gene_101	74856	75266	-	PF01541.23	34	112	4.9e-06	26.6	0.769231	GIY-YIG catalytic domain
NODE_1_length_167096_cov_338.28	gene_101	74856	75266	-	cd00719	36	125	6e-06	39.3	0.98	GIY-YIG nuclease domain superfamily. The GIY-YIG nuclease domain superfamily includes a large and diverse group of proteins involved in many cellular processes, such as class I homing GIY-YIG family endonucleases, prokaryotic nucleotide excision repair proteins UvrC and Cho, type II restriction enzymes, the endonuclease/reverse transcriptase of eukaryotic retrotransposable elements, and a family …
NODE_1_length_167096_cov_338.28	gene_101	74856	75266	-	cd10434	42	131	5e-05	37.1	0.84	Catalytic GIY-YIG domain of nucleotide excision repair endonucleases UvrC, Cho, and similar proteins. UvrC is essential for nucleotide excision repair (NER). The N-terminal catalytic GIY-YIG domain of UvrC (also known as Uri domain) is responsible for the 3' incision reaction and the C-terminal half of UvrC, consisting of an UvrB-binding domain (UvrBb), EndoV-like nuclease domain and a helix-hair…
NODE_1_length_167096_cov_338.28	gene_101	74856	75266	-	cd10436	34	132	3e-30	105	0.99	Catalytic GIY-YIG domain of coliphage T4 non-specific endonuclease II, type II restriction endonuclease R.Hpy188I, and similar proteins. This family includes two different GIY-YIG enzymes, coliphage T4 non-specific endonuclease II (EndoII), and type II restriction endonuclease R.Hpy188I. They display high sequence similarity to each other, and both of them contain an extra N-terminal hairpin that…
NODE_1_length_167096_cov_338.28	gene_101	74856	75266	-	smart00465	33	135	2e-09	45.9	0.98	GIY-YIG type nucleases (URI domain).
NODE_1_length_167096_cov_338.28	gene_102	75294	76472	-	COG0208	1	382	3e-73	232	0.98	Ribonucleotide reductase beta subunit, ferritin-like domain [Nucleotide transport and metabolism].
NODE_1_length_167096_cov_338.28	gene_102	75294	76472	-	NF006576.0	3	388	1.7e-144	480.6	0.986702	PRK09101.1: ribonucleotide-diphosphate reductase subunit beta
NODE_1_length_167096_cov_338.28	gene_102	75294	76472	-	PF00268.20	33	335	9.5e-35	120.3	0.938849	Ribonucleotide reductase, small chain
NODE_1_length_167096_cov_338.28	gene_102	75294	76472	-	PRK07209	48	352	3e-11	61.9	0.72	ribonucleotide-diphosphate reductase subunit beta; Validated
NODE_1_length_167096_cov_338.28	gene_102	75294	76472	-	PRK09101	3	382	5e-179	505	0.97	ribonucleotide-diphosphate reductase subunit beta; Reviewed
NODE_1_length_167096_cov_338.28	gene_102	75294	76472	-	PRK09614	16	383	4e-25	102	0.96	ribonucleotide-diphosphate reductase subunit beta; Reviewed
NODE_1_length_167096_cov_338.28	gene_102	75294	76472	-	PRK13965	47	161	1e-06	47.5	0.34	ribonucleotide-diphosphate reductase subunit beta; Provisional
NODE_1_length_167096_cov_338.28	gene_102	75294	76472	-	PRK13967	29	161	5e-06	45.5	0.41	ribonucleotide-diphosphate reductase subunit beta; Provisional
NODE_1_length_167096_cov_338.28	gene_102	75294	76472	-	cd01049	28	355	2e-69	221	0.99	Ribonucleotide Reductase, R2/beta subunit, ferritin-like diiron-binding domain. Ribonucleotide Reductase, R2/beta subunit (RNRR2) is a member of a broad superfamily of ferritin-like diiron-carboxylate proteins. The RNR protein catalyzes the conversion of ribonucleotides to deoxyribonucleotides and is found in all eukaryotes, many prokaryotes, several viruses, and few archaea. The catalytically ac…
NODE_1_length_167096_cov_338.28	gene_103	76524	78788	-	COG0209	47	753	0	556	0.98	Ribonucleotide reductase alpha subunit [Nucleotide transport and metabolism].
NODE_1_length_167096_cov_338.28	gene_103	76524	78788	-	NF006578.0	3	752	5e-300	996.2	0.99343	PRK09103.1: ribonucleoside-diphosphate reductase subunit alpha
NODE_1_length_167096_cov_338.28	gene_103	76524	78788	-	PF02867.14	220	663	2.3e-114	382.7	0.837786	Ribonucleotide reductase, barrel domain
NODE_1_length_167096_cov_338.28	gene_103	76524	78788	-	PRK06406	185	671	6e-27	114	0.54	ribonucleotide-diphosphate reductase subunit alpha; Validated
NODE_1_length_167096_cov_338.28	gene_103	76524	78788	-	PRK06539	4	727	2e-83	282	0.86	ribonucleotide-diphosphate reductase subunit alpha; Validated
NODE_1_length_167096_cov_338.28	gene_103	76524	78788	-	PRK06948	391	634	5e-13	70.2	0.38	ribonucleotide reductase-like protein; Provisional
NODE_1_length_167096_cov_338.28	gene_103	76524	78788	-	PRK07088	19	751	8e-102	331	0.92	ribonucleotide-diphosphate reductase subunit alpha; Validated
NODE_1_length_167096_cov_338.28	gene_103	76524	78788	-	PRK07187	86	754	3e-47	176	0.9	ribonucleotide-diphosphate reductase subunit alpha; Validated
NODE_1_length_167096_cov_338.28	gene_103	76524	78788	-	PRK07207	4	651	8e-65	231	0.64	ribonucleotide-diphosphate reductase subunit alpha; Validated
NODE_1_length_167096_cov_338.28	gene_103	76524	78788	-	PRK07306	99	631	4e-29	121	0.72	ribonucleotide-diphosphate reductase subunit alpha; Validated
NODE_1_length_167096_cov_338.28	gene_103	76524	78788	-	PRK07632	99	631	9e-39	151	0.74	ribonucleotide-diphosphate reductase subunit alpha; Validated
NODE_1_length_167096_cov_338.28	gene_103	76524	78788	-	PRK08115	175	631	1e-18	88.4	0.51	ribonucleotide-diphosphate reductase subunit alpha; Validated
NODE_1_length_167096_cov_338.28	gene_103	76524	78788	-	PRK08188	104	754	6e-37	145	0.83	ribonucleotide-diphosphate reductase subunit alpha; Validated
NODE_1_length_167096_cov_338.28	gene_103	76524	78788	-	PRK08332	467	654	3e-18	87.9	0.11	ribonucleotide-diphosphate reductase subunit alpha; Validated
NODE_1_length_167096_cov_338.28	gene_103	76524	78788	-	PRK08447	3	727	1e-96	318	0.89	ribonucleotide-diphosphate reductase subunit alpha; Validated
NODE_1_length_167096_cov_338.28	gene_103	76524	78788	-	PRK08665	134	631	4e-26	111	0.55	ribonucleotide-diphosphate reductase subunit alpha; Validated
NODE_1_length_167096_cov_338.28	gene_103	76524	78788	-	PRK09102	132	752	2e-54	196	0.88	ribonucleotide-diphosphate reductase subunit alpha; Validated
NODE_1_length_167096_cov_338.28	gene_103	76524	78788	-	PRK09103	4	754	0	1063	0.99	ribonucleotide-diphosphate reductase subunit alpha; Validated
NODE_1_length_167096_cov_338.28	gene_103	76524	78788	-	PRK09209	4	752	2e-93	309	0.94	ribonucleotide-diphosphate reductase subunit alpha; Validated
NODE_1_length_167096_cov_338.28	gene_103	76524	78788	-	PRK12364	12	752	7e-89	298	0.83	ribonucleotide-diphosphate reductase subunit alpha; Provisional
NODE_1_length_167096_cov_338.28	gene_103	76524	78788	-	PRK12365	2	653	2e-72	254	0.61	ribonucleotide-diphosphate reductase subunit alpha; Provisional
NODE_1_length_167096_cov_338.28	gene_103	76524	78788	-	TIGR02506	143	731	2.5e-160	532.9	1	NrdE_NrdA: ribonucleoside-diphosphate reductase, alpha subunit
NODE_1_length_167096_cov_338.28	gene_103	76524	78788	-	cd00576	192	728	1e-32	129	0.93	Ribonucleotide reductase and Pyruvate formate lyase. Ribonucleotide reductase (RNR) and pyruvate formate lyase (PFL) are believed to have diverged from a common ancestor. They have a structurally similar ten-stranded alpha-beta barrel domain that hosts the active site, and are radical enzymes. RNRs are found in all organisms and provide the only mechanism by which nucleotides are converted to deo…
NODE_1_length_167096_cov_338.28	gene_103	76524	78788	-	cd01679	167	730	5e-141	424	0.99	Class I ribonucleotide reductase. Ribonucleotide reductase (RNR) catalyzes the reductive synthesis of deoxyribonucleotides from their corresponding ribonucleotides. It provides the precursors necessary for DNA synthesis. RNRs are separated into three classes based on their metallocofactor usage. Class I RNRs, found in eukaryotes, bacteria, and many viruses, use a diiron-tyrosyl radical. Class II …
NODE_1_length_167096_cov_338.28	gene_103	76524	78788	-	cd02888	192	637	5e-49	178	0.86	Class II ribonucleotide reductase, dimeric form. Ribonucleotide reductase (RNR) catalyzes the reductive synthesis of deoxyribonucleotides from their corresponding ribonucleotides. It provides the precursors necessary for DNA synthesis. RNRs are separated into three classes based on their metallocofactor usage. Class I RNRs, found in eukaryotes, bacteria, and bacteriophage, use a diiron-tyrosyl ra…
NODE_1_length_167096_cov_338.28	gene_104	78779	79066	-	PF14216.5	3	77	2.1e-19	69.9	0.927711	Domain of unknown function (DUF4326)
NODE_1_length_167096_cov_338.28	gene_106	79346	80206	-	COG0207	1	286	1e-105	309	0.97	Thymidylate synthase [Nucleotide transport and metabolism].
NODE_1_length_167096_cov_338.28	gene_106	79346	80206	-	PF00303.18	2	286	3.9e-97	324.5	1	Thymidylate synthase
NODE_1_length_167096_cov_338.28	gene_106	79346	80206	-	PRK00956	109	231	3e-15	70.8	0.6	thymidylate synthase; Provisional
NODE_1_length_167096_cov_338.28	gene_106	79346	80206	-	PRK01827	1	286	2e-123	355	0.97	thymidylate synthase; Reviewed
NODE_1_length_167096_cov_338.28	gene_106	79346	80206	-	PRK13821	1	286	3e-69	218	0.86	thymidylate synthase; Provisional
NODE_1_length_167096_cov_338.28	gene_106	79346	80206	-	TIGR03284	2	286	2.4e-87	290.8	1	thym_sym: thymidylate synthase
NODE_1_length_167096_cov_338.28	gene_106	79346	80206	-	cd00351	3	227	1e-95	282	0.98	Thymidylate synthase and pyrimidine hydroxymethylase: Thymidylate synthase (TS) and deoxycytidylate hydroxymethylase (dCMP-HMase) are homologs that catalyze analogous alkylation of C5 of pyrimidine nucleotides. Both enzymes are involved in the biosynthesis of DNA precursors and are active as homodimers. However, they exhibit distinct pyrimidine base specificities and differ in the details of thei…
NODE_1_length_167096_cov_338.28	gene_108	80620	81201	-	COG0262	1	148	1e-11	57.3	0.72	Dihydrofolate reductase [Coenzyme transport and metabolism].
NODE_1_length_167096_cov_338.28	gene_108	80620	81201	-	PF00186.18	22	157	3e-17	62.7	0.708075	Dihydrofolate reductase
NODE_1_length_167096_cov_338.28	gene_108	80620	81201	-	PRK10769	23	148	2e-06	44	0.64	dihydrofolate reductase; Provisional
NODE_1_length_167096_cov_338.28	gene_108	80620	81201	-	cd00209	2	193	5e-18	76.4	0.95	Dihydrofolate reductase (DHFR). Reduces 7,8-dihydrofolate to 5,6,7,8-tetrahydrofolate with NADPH as a cofactor. This is an essential step in the biosynthesis of deoxythymidine phosphate since 5,6,7,8-tetrahydrofolate is required to regenerate 5,10-methylenetetrahydrofolate which is then utilized by thymidylate synthase. Inhibition of DHFR interrupts thymidilate synthesis and DNA replication, inhi…
NODE_1_length_167096_cov_338.28	gene_114	82968	83873	-	PF08804.9	28	116	2.9e-51	171.4	1	gp32 DNA binding protein like
NODE_1_length_167096_cov_338.28	gene_115	83928	84560	-	cd10444	3	97	2e-18	75.5	0.97	N-terminal catalytic GIY-YIG domain of bacteriophage T4 segABCDEFG gene encoding proteins. The prototypes of Seg family are proteins SegA, B, C, D, E, F, and G encoded by five seg genes segA, B, C, D, E, F, and G in the bacteriophage T4 genome, respectively. SegA, B, C, D, E, F, and G are not encoded by introns, but free-standing homologs of the GIY-YIG family of endonucleases encoded by group I …
NODE_1_length_167096_cov_338.28	gene_116	84562	85215	-	PF08994.9	113	216	2.8e-55	185.2	1	T4 gene Gp59 loader of gp41 DNA helicase C-term
NODE_1_length_167096_cov_338.28	gene_117	85212	85550	-	PF16805.4	38	108	5.5e-28	96.8	0.985507	Phage late-transcription coactivator
NODE_1_length_167096_cov_338.28	gene_118	85528	85797	-	PF11126.7	22	88	3.7e-41	139.1	1	Transcriptional regulator DsbA
NODE_1_length_167096_cov_338.28	gene_119	85806	86723	-	COG0258	63	206	3e-06	45	0.43	5'-3' exonuclease [Replication, recombination and repair].
NODE_1_length_167096_cov_338.28	gene_119	85806	86723	-	PF09293.9	183	305	8.3e-70	232.8	1	T4 RNase H, C terminal
NODE_1_length_167096_cov_338.28	gene_119	85806	86723	-	PRK05755	113	240	4e-09	55.5	0.14	DNA polymerase I; Provisional
NODE_1_length_167096_cov_338.28	gene_119	85806	86723	-	PRK09482	71	180	2e-08	51.8	0.36	flap endonuclease-like protein; Provisional
NODE_1_length_167096_cov_338.28	gene_119	85806	86723	-	cd00008	15	180	5e-75	229	1	PIN domains of the 5'-3' exonucleases of DNA polymerase I, bacteriophage T4 RNase H and T5-5' nucleases, and homologs. PIN (PilT N terminus) domains of the 5'-3' exonucleases (53EXO) of mutli-domain DNA polymerase I and single domain protein homologs, as well as, the PIN domains of bacteriophage T5-5'nuclease (T5FEN or 5'-3'exonuclease), bacteriophage T4 RNase H (T4FEN), bacteriophage T3 (T3 phag…
NODE_1_length_167096_cov_338.28	gene_119	85806	86723	-	cd09852	43	171	1e-11	59.1	0.93	PIN (PilT N terminus) domain: Superfamily. PIN_SF The PIN (PilT N terminus) domain belongs to a large nuclease superfamily with representatives from eukaryota, eubacteria, and archaea. PIN domains were originally named for their sequence similarity to the N-terminal domain of an annotated pili biogenesis protein, PilT, a domain fusion between a PIN-domain and a PilT ATPase domain. The structural …
NODE_1_length_167096_cov_338.28	gene_119	85806	86723	-	cd09853	15	179	1e-66	207	0.98	PIN domains of structure-specific 5' nucleases (or flap endonuclease-1-like) involved in DNA replication, repair, and recombination. Structure-specific 5' nucleases are capable of both 5'-3' exonucleolytic activity and cleaving bifurcated or branched DNA, in an endonucleolytic, structure-specific manner. The family includes the PIN (PilT N terminus) domains of Flap Endonuclease-1 (FEN1), Exonucle…
NODE_1_length_167096_cov_338.28	gene_119	85806	86723	-	cd09859	59	176	6e-11	58.2	0.57	PIN domain of the 5'-3' exonuclease of Taq DNA polymerase I and homologs. The 5'-3' exonuclease (53EXO) PIN (PilT N terminus) domain of multi-domain DNA polymerase I and single domain protein homologs are included in this family. Taq contains a polymerase domain for synthesizing a new DNA strand and a 53EXO PIN domain for cleaving RNA primers or damaged DNA strands. Taq's 53EXO PIN domain recogni…
NODE_1_length_167096_cov_338.28	gene_119	85806	86723	-	cd09860	14	181	1e-68	212	0.95	PIN domain of bacteriophage T3, T4 RNase H, T5-5'nuclease, and homologs. PIN (PilT N terminus) domain of bacteriophage T5-5'nuclease (5'-3' exonuclease or T5FEN), bacteriophage T4 RNase H (T4FEN), bacteriophage T3 (T3 phage exodeoxyribonuclease) and other similar 5' nucleases are included in this family. T5-5'nuclease is a 5'-3'exodeoxyribonuclease that also exhibits endonucleolytic activity on f…
NODE_1_length_167096_cov_338.28	gene_119	85806	86723	-	cd09899	184	259	5e-12	59.4	0.84	H3TH domain of bacteriophage T3, T4 RNase H, T5-5' nucleases, and homologs. H3TH (helix-3-turn-helix) domains of bacteriophage T5-5'nuclease (5'-3' exonuclease or T5FEN), bacteriophage T4 RNase H (T4FEN), bacteriophage T3 (T3 phage exodeoxyribonuclease) and other similar 5' nucleases are included in this family. The T5-5'nuclease is a 5'-3' exodeoxyribonuclease that also exhibits endonucleolytic …
NODE_1_length_167096_cov_338.28	gene_119	85806	86723	-	smart00279	185	220	7e-08	43.6	1	Helix-hairpin-helix class 2 (Pol1 family) motifs.
NODE_1_length_167096_cov_338.28	gene_119	85806	86723	-	smart00475	58	206	2e-14	66.1	0.5	5'-3' exonuclease.
NODE_1_length_167096_cov_338.28	gene_121	90706	91821	+	PF15711.4	58	113	1.2e-07	32	0.617978	Interleukin-like EMT inducer
NODE_1_length_167096_cov_338.28	gene_122	91884	92534	+	PF03903.12	1	216	1.4e-87	292.8	1	Phage T4 tail fibre
NODE_1_length_167096_cov_338.28	gene_123	92543	95488	+	PF13884.5	869	925	5.8e-08	32.8	1	Chaperone of endosialidase
NODE_1_length_167096_cov_338.28	gene_124	95525	96307	+	PF05268.10	1	260	6.3e-126	419.3	1	Phage tail fibre adhesin Gp38
NODE_1_length_167096_cov_338.28	gene_126	96995	97267	-	PF09010.9	2	81	2.2e-42	142.9	1	Anti-Sigma Factor A
NODE_1_length_167096_cov_338.28	gene_137	100495	101823	-	COG0188	3	382	3e-55	194	0.45	DNA gyrase/topoisomerase IV, subunit A [Replication, recombination and repair].
NODE_1_length_167096_cov_338.28	gene_137	100495	101823	-	PF00521.19	27	429	3.7e-78	263.2	0.971831	DNA gyrase/topoisomerase IV, subunit A
NODE_1_length_167096_cov_338.28	gene_137	100495	101823	-	PRK05560	17	236	3e-21	94.3	0.25	DNA gyrase subunit A; Validated
NODE_1_length_167096_cov_338.28	gene_137	100495	101823	-	PRK05561	5	236	1e-33	132	0.29	DNA topoisomerase IV subunit A; Validated
NODE_1_length_167096_cov_338.28	gene_137	100495	101823	-	PRK09630	6	247	6e-23	98.8	0.48	DNA topoisomerase IV subunit A; Provisional
NODE_1_length_167096_cov_338.28	gene_137	100495	101823	-	PRK09631	7	247	9e-31	122	0.36	DNA topoisomerase IV subunit A; Provisional
NODE_1_length_167096_cov_338.28	gene_137	100495	101823	-	PRK12758	17	257	2e-21	95.1	0.26	DNA topoisomerase IV subunit A; Provisional
NODE_1_length_167096_cov_338.28	gene_137	100495	101823	-	PRK13979	17	195	1e-21	95.6	0.18	DNA topoisomerase IV subunit A; Provisional
NODE_1_length_167096_cov_338.28	gene_137	100495	101823	-	cd00187	27	405	5e-66	218	0.8	DNA Topoisomerase, subtype IIA; domain A'; bacterial DNA topoisomerase IV (C subunit, ParC), bacterial DNA gyrases (A subunit, GyrA),mammalian DNA toposiomerases II. DNA topoisomerases are essential enzymes that regulate the conformational changes in DNA topology by catalysing the concerted breakage and rejoining of DNA strands during normal cellular growth.
NODE_1_length_167096_cov_338.28	gene_137	100495	101823	-	smart00434	6	442	1e-142	413	0.98	DNA Topoisomerase IV. Bacterial DNA topoisomerase IV, GyrA, ParC
NODE_1_length_167096_cov_338.28	gene_139	102207	102665	-	PF06591.10	1	152	6.7e-97	321.3	1	T4-like phage nuclear disruption protein (Ndd)
NODE_1_length_167096_cov_338.28	gene_151	108227	110044	-	COG0187	6	603	4e-94	302	0.87	DNA gyrase/topoisomerase IV, subunit B [Replication, recombination and repair].
NODE_1_length_167096_cov_338.28	gene_151	108227	110044	-	PF02518.25	46	188	7.5e-14	52.1	0.945946	Histidine kinase-, DNA gyrase B-, and HSP90-like ATPase
NODE_1_length_167096_cov_338.28	gene_151	108227	110044	-	PRK05559	6	603	3e-79	263	0.85	DNA topoisomerase IV subunit B; Reviewed
NODE_1_length_167096_cov_338.28	gene_151	108227	110044	-	PRK05644	4	601	1e-53	193	0.8	DNA gyrase subunit B; Validated
NODE_1_length_167096_cov_338.28	gene_151	108227	110044	-	PRK14939	6	532	2e-39	152	0.6	DNA gyrase subunit B; Provisional
NODE_1_length_167096_cov_338.28	gene_151	108227	110044	-	cd00075	48	185	2e-07	48.4	0.95	Histidine kinase-like ATPases; This family includes several ATP-binding proteins for example: histidine kinase, DNA gyrase B, topoisomerases, heat shock protein HSP90, phytochrome-like ATPases and DNA mismatch repair proteins
NODE_1_length_167096_cov_338.28	gene_151	108227	110044	-	cd00822	265	374	3e-10	57.6	0.59	TopoIIA_Trans_DNA_gyrase: Transducer domain, having a ribosomal S5 domain 2-like fold, of the type found in proteins of the type IIA family of DNA topoisomerases similar to the B subunits of E. coli DNA gyrase and E. coli Topoisomerase IV which are heterodimers composed of two subunits. The type IIA enzymes are the predominant form of topoisomerase and are found in some bacteriophages, viruses an…
NODE_1_length_167096_cov_338.28	gene_151	108227	110044	-	cd01030	409	515	7e-30	113	0.93	TOPRIM_TopoIIA_like: topoisomerase-primase (TOPRIM) nucleotidyl transferase/hydrolase domain of the type found in proteins of the type IIA family of DNA topoisomerases similar to Saccharomyces cerevisiae Topoisomerase II. TopoIIA enzymes cut both strands of the duplex DNA to remove (relax) both positive and negative supercoils in DNA. These enzymes covalently attach to the 5' ends of the cut DNA,…
NODE_1_length_167096_cov_338.28	gene_151	108227	110044	-	cd03365	410	510	1e-18	81.6	0.84	TOPRIM_TopoIIA: topoisomerase-primase (TOPRIM) nucleotidyl transferase/hydrolase domain of the type found in proteins of the type IIA family of DNA topoisomerases similar to Saccharomyces cerevisiae Topoisomerase II. TopoIIA enzymes cut both strands of the duplex DNA to remove (relax) both positive and negative supercoils in DNA. These enzymes covalently attach to the 5' ends of the cut DNA, sepa…
NODE_1_length_167096_cov_338.28	gene_151	108227	110044	-	cd03366	411	521	1e-18	81.5	0.96	TOPRIM_TopoIIA_GyrB: topoisomerase-primase (TOPRIM) nucleotidyl transferase/hydrolase domain of the type found in proteins of the type IIA family of DNA topoisomerases similar to the Escherichia coli GyrB subunit. TopoIIA enzymes cut both strands of the duplex DNA to remove (relax) both positive and negative supercoils in DNA. These enzymes covalently attach to the 5' ends of the cut DNA, separat…
NODE_1_length_167096_cov_338.28	gene_151	108227	110044	-	cd03481	230	339	2e-20	88.1	0.72	TopoIIA_Trans_ScTopoIIA: Transducer domain, having a ribosomal S5 domain 2-like fold, of the type found in proteins of the type IIA family of DNA topoisomerases similar to Saccharomyces cerevisiae Topo IIA. S. cerevisiae Topo IIA is a homodimer encoded by a single gene. The type IIA enzymes are the predominant form of topoisomerase and are found in some bacteriophages, viruses and archaea, and in…
NODE_1_length_167096_cov_338.28	gene_151	108227	110044	-	smart00387	47	189	2e-08	47.3	0.9	Histidine kinase-like ATPases. Histidine kinase-, DNA gyrase B-, phytochrome-like ATPases.
NODE_1_length_167096_cov_338.28	gene_151	108227	110044	-	smart00433	47	605	8e-101	316	0.91	TopoisomeraseII. Eukaryotic DNA topoisomerase II, GyrB, ParE
NODE_1_length_167096_cov_338.28	gene_154	110754	110930	-	COG2331	1	53	7e-05	34.1	0.63	Predicted nucleic acid-binding protein, contains Zn-ribbon domain [General function prediction only].
NODE_1_length_167096_cov_338.28	gene_154	110754	110930	-	PF09723.9	1	38	8.8e-12	44.9	0.875	Zinc ribbon domain
NODE_1_length_167096_cov_338.28	gene_154	110754	110930	-	TIGR02605	1	45	8.3e-12	43	0.846154	CxxC_CxxC_SSSS: putative regulatory protein, FmdB family
NODE_1_length_167096_cov_338.28	gene_154	110754	110930	-	smart00834	1	43	2e-12	51.8	1	Putative regulatory protein. CxxC_CXXC_SSSS represents a region of about 41 amino acids found in a number of small proteins in a wide range of bacteria. The region usually begins with the initiator Met and contains two CxxC motifs separated by 17 amino acids. One protein in this entry has been noted as a putative regulatory protein, designated FmdB. Most proteins in this entry have a C-terminal r…
NODE_1_length_167096_cov_338.28	gene_160	113414	114097	-	PF16473.4	4	164	1.1e-19	70.9	0.76506	3' exoribonuclease, RNase T-like
NODE_1_length_167096_cov_338.28	gene_160	113414	114097	-	cd06127	5	192	2e-05	41.1	0.92	DEDDh 3'-5' exonuclease domain family. DEDDh exonucleases, part of the DnaQ-like (or DEDD) exonuclease superfamily, catalyze the excision of nucleoside monophosphates at the DNA or RNA termini in the 3'-5' direction. These proteins contain four invariant acidic residues in three conserved sequence motifs termed ExoI, ExoII and ExoIII. DEDDh exonucleases are classified as such because of the prese…
NODE_1_length_167096_cov_338.28	gene_163	114599	115918	-	COG0507	32	436	6e-19	86.8	0.46	ATP-dependent exoDNAse (exonuclease V), alpha subunit, helicase superfamily I [Replication, recombination and repair].
NODE_1_length_167096_cov_338.28	gene_163	114599	115918	-	PF13604.5	6	194	8.7e-26	90.7	0.895833	AAA domain
NODE_1_length_167096_cov_338.28	gene_163	114599	115918	-	PRK10875	30	153	3e-08	53.4	0.18	exonuclease V subunit alpha; Provisional
NODE_1_length_167096_cov_338.28	gene_163	114599	115918	-	PRK13709	5	153	3e-06	47.5	0.08	conjugal transfer nickase/helicase TraI; Provisional
NODE_1_length_167096_cov_338.28	gene_163	114599	115918	-	smart00382	24	129	3e-07	43.9	0.67	ATPases associated with a variety of cellular activities. AAA - ATPases associated with a variety of cellular activities. This profile/alignment only detects a fraction of this vast family. The poorly conserved N-terminal helix is missing from the alignment.
NODE_1_length_167096_cov_338.28	gene_163	114599	115918	-	smart00487	1	140	4e-07	44.4	0.68	DEAD-like helicases superfamily.
NODE_1_length_167096_cov_338.28	gene_177	121200	121718	-	cd11527	35	172	1e-08	48	1	Nucleoside Triphosphate Pyrophosphohydrolase (EC 3.6.1.8) MazG-like domain found in dimeric 2-Deoxyuridine 5'-triphosphate nucleotidohydrolase and similar proteins. dUTPase (dUTP pyrophosphatase; EC 3.6.1.23) catalyzes the hydrolysis of dUTP to dUMP and pyrophosphate. It acts to ensure chromosomal integrity by reducing the effective ratio of dUTP/dTTP. Members in this family are dimeric dUTPases,…
NODE_1_length_167096_cov_338.28	gene_178	121779	122558	-	COG0338	7	257	1e-30	114	0.89	Site-specific DNA-adenine methylase [Replication, recombination and repair].
NODE_1_length_167096_cov_338.28	gene_178	121779	122558	-	PF02086.14	7	237	4.2e-49	167.5	0.976923	D12 class N6 adenine-specific DNA methyltransferase
NODE_1_length_167096_cov_338.28	gene_178	121779	122558	-	PRK10904	7	174	2e-16	74.4	0.62	DNA adenine methylase; Provisional
NODE_1_length_167096_cov_338.28	gene_178	121779	122558	-	TIGR00571	1	259	3.6e-70	234.6	1	dam: DNA adenine methylase
NODE_1_length_167096_cov_338.28	gene_181	123416	124444	-	COG0358	64	314	9e-07	47.5	0.42	DNA primase (bacterial type) [Replication, recombination and repair].
NODE_1_length_167096_cov_338.28	gene_181	123416	124444	-	PF08275.10	178	209	0.00017	21.5	0.25	DNA primase catalytic core, N-terminal domain
NODE_1_length_167096_cov_338.28	gene_182	124447	124611	-	PF07068.10	3	39	9e-06	24.6	0.0726916	Major capsid protein Gp23
NODE_1_length_167096_cov_338.28	gene_187	126093	127520	-	COG0305	53	382	1e-11	63.4	0.72	Replicative DNA helicase [Replication, recombination and repair].
NODE_1_length_167096_cov_338.28	gene_187	126093	127520	-	PF03796.14	174	409	1e-16	61	0.917647	DnaB-like helicase C terminal domain
NODE_1_length_167096_cov_338.28	gene_187	126093	127520	-	PRK06749	179	403	8e-05	42.6	0.5	replicative DNA helicase; Provisional
NODE_1_length_167096_cov_338.28	gene_187	126093	127520	-	cd00984	179	382	3e-11	61	0.79	DnaB helicase C terminal domain. The hexameric helicase DnaB unwinds the DNA duplex at the chromosome replication fork. Although the mechanism by which DnaB both couples ATP hydrolysis to translocation along DNA and denatures the duplex is unknown, a change in the quaternary structure of the protein involving dimerization of the N-terminal domain has been observed and may occur during the enzymat…
NODE_1_length_167096_cov_338.28	gene_187	126093	127520	-	cd01122	170	408	5e-08	52	0.84	GP4d_helicase is a homohexameric 5'-3' helicases. Helicases couple NTP hydrolysis to the unwinding of nucleic acid duplexes into their component strands.
NODE_1_length_167096_cov_338.28	gene_188	127530	127874	-	PF11113.7	44	99	2.9e-26	91.2	1	Head assembly gene product
NODE_1_length_167096_cov_338.28	gene_189	127867	129048	-	COG0468	11	282	2e-12	64.2	0.91	RecA/RadA recombinase [Replication, recombination and repair].
NODE_1_length_167096_cov_338.28	gene_189	127867	129048	-	PF00154.20	42	268	3.5e-11	43	0.855513	recA bacterial DNA recombination protein
NODE_1_length_167096_cov_338.28	gene_189	127867	129048	-	PRK09519	38	273	2e-09	57	0.28	DNA recombination protein RecA; Reviewed
NODE_1_length_167096_cov_338.28	gene_189	127867	129048	-	cd00983	87	292	1e-11	63	0.6	RecA is a bacterial enzyme which has roles in homologous recombination, DNA repair, and the induction of the SOS response. RecA couples ATP hydrolysis to DNA strand exchange.
NODE_1_length_167096_cov_338.28	gene_189	127867	129048	-	cd01393	43	232	4e-06	45.3	0.81	RecA is a bacterial enzyme which has roles in homologous recombination, DNA repair, and the induction of the SOS response. RecA couples ATP hydrolysis to DNA strand exchange. While prokaryotes have a single RecA protein, eukaryotes have multiple RecA homologs such as Rad51, DMC1 and Rad55/57. Archaea have the RecA-like homologs radA and radB.
NODE_1_length_167096_cov_338.28	gene_191	129965	130705	-	COG0207	27	222	1e-09	54.6	0.68	Thymidylate synthase [Nucleotide transport and metabolism].
NODE_1_length_167096_cov_338.28	gene_191	129965	130705	-	PF00303.18	25	232	9.5e-16	57.6	0.783582	Thymidylate synthase
NODE_1_length_167096_cov_338.28	gene_191	129965	130705	-	PRK00956	108	222	3e-05	41.5	0.48	thymidylate synthase; Provisional
NODE_1_length_167096_cov_338.28	gene_191	129965	130705	-	cd00351	27	222	8e-18	77.3	0.84	Thymidylate synthase and pyrimidine hydroxymethylase: Thymidylate synthase (TS) and deoxycytidylate hydroxymethylase (dCMP-HMase) are homologs that catalyze analogous alkylation of C5 of pyrimidine nucleotides. Both enzymes are involved in the biosynthesis of DNA precursors and are active as homodimers. However, they exhibit distinct pyrimidine base specificities and differ in the details of thei…
NODE_1_length_167096_cov_338.28	gene_193	130859	131110	-	PF14373.5	22	63	1.3e-14	53.7	1	Superinfection immunity protein
NODE_1_length_167096_cov_338.28	gene_196	131929	134625	-	COG0417	188	768	6e-39	152	0.58	DNA polymerase elongation subunit (family B) [Replication, recombination and repair].
NODE_1_length_167096_cov_338.28	gene_196	131929	134625	-	PF00136.20	366	768	1.1e-27	96.8	0.700431	DNA polymerase family B
NODE_1_length_167096_cov_338.28	gene_196	131929	134625	-	PRK05761	174	428	4e-10	61.2	0.28	DNA polymerase I; Reviewed
NODE_1_length_167096_cov_338.28	gene_196	131929	134625	-	PRK05762	188	770	3e-38	151	0.59	DNA polymerase II; Reviewed
NODE_1_length_167096_cov_338.28	gene_196	131929	134625	-	cd00145	386	782	3e-54	190	0.89	DNA polymerase type-B family catalytic domain. DNA-directed DNA polymerases elongate DNA by adding nucleotide triphosphate (dNTP) residues to the 5'-end of the growing chain of DNA. DNA-directed DNA polymerases are multifunctional with both synthetic (polymerase) and degradative modes (exonucleases) and play roles in the processes of DNA replication, repair, and recombination. DNA-dependent DNA p…
NODE_1_length_167096_cov_338.28	gene_196	131929	134625	-	cd05160	108	332	7e-34	129	0.98	DEDDy 3'-5' exonuclease domain of family-B DNA polymerases. The 3'-5' exonuclease domain of family-B DNA polymerases. This domain has a fundamental role in reducing polymerase errors and is involved in proofreading activity. Family-B DNA polymerases contain an N-terminal DEDDy DnaQ-like exonuclease domain in the same polypeptide chain as the polymerase domain, similar to family-A DNA polymerases.…
NODE_1_length_167096_cov_338.28	gene_196	131929	134625	-	cd05530	386	428	6e-06	47.3	0.12	DNA polymerase type-B B1 subfamily catalytic domain. Archaeal proteins that are involved in DNA replication are similar to those from eukaryotes. Some archaeal members also possess multiple family B DNA polymerases (B1, B2 and B3). So far there is no specific function(s) has been assigned for different members of the archaea type B DNA polymerases. Phylogenetic analyses of eubacterial, archaeal, …
NODE_1_length_167096_cov_338.28	gene_196	131929	134625	-	cd05531	390	500	8e-06	46.6	0.27	DNA polymerase type-B B2 subfamily catalytic domain. Archaeal proteins that are involved in DNA replication are similar to those from eukaryotes. Some archaeal members also possess multiple family B DNA polymerases (B1, B2 and B3). So far there is no specific function(s) has been assigned for different members of the archaea type B DNA polymerases. Phylogenetic analyses of eubacterial, archaeal, …
NODE_1_length_167096_cov_338.28	gene_196	131929	134625	-	cd05532	385	667	3e-07	51	0.49	DNA polymerase type-B alpha subfamily catalytic domain. Three DNA-dependent DNA polymerases type B (alpha, delta, and epsilon) have been identified as essential for nuclear DNA replication in eukaryotes. DNA polymerase (Pol) alpha is almost exclusively required for the initiation of DNA replication and the priming of Okazaki fragments during elongation. In most organisms no specific repair role, …
NODE_1_length_167096_cov_338.28	gene_196	131929	134625	-	cd05536	385	758	3e-13	70	0.69	DNA polymerase type-B B3 subfamily catalytic domain. Archaeal proteins that are involved in DNA replication are similar to those from eukaryotes. Some members of the archaea also possess multiple family B DNA polymerases (B1, B2 and B3). So far there is no specific function(s) has been assigned for different members of the archaea type B DNA polymerases. Phylogenetic analyses of eubacterial, arch…
NODE_1_length_167096_cov_338.28	gene_196	131929	134625	-	cd05537	386	776	1e-15	77.3	0.72	DNA polymerase type-II subfamily catalytic domain. Bacteria contain five DNA polymerases (I, II, III, IV and V). DNA polymerase II (Pol II) is a prototype for the B-family of polymerases. The role of Pol II in a variety of cellular activities, such as repair of DNA damaged by UV irradiation or oxidation has been proven by genetic studies. DNA polymerase III is the main enzyme responsible for repl…
NODE_1_length_167096_cov_338.28	gene_196	131929	134625	-	cd05777	186	293	1e-12	66.8	0.43	DEDDy 3'-5' exonuclease domain of eukaryotic DNA polymerase delta, a family-B DNA polymerase. The 3'-5' exonuclease domain of eukaryotic DNA polymerase delta. DNA polymerase delta is a family-B DNA polymerase with a catalytic subunit that contains a DEDDy-type DnaQ-like 3'-5' exonuclease domain. It is one of the three DNA-dependent type B DNA polymerases (alpha and epsilon are the other two) that…
NODE_1_length_167096_cov_338.28	gene_196	131929	134625	-	cd05778	113	293	3e-05	44.1	0.71	inactive DEDDy 3'-5' exonuclease domain of eukaryotic DNA polymerase zeta, a family-B DNA polymerase. The 3'-5' exonuclease domain of eukaryotic DNA polymerase zeta. DNA polymerase zeta is a family-B DNA polymerase which is distantly related to DNA polymerase delta. It plays a major role in translesion replication and the production of either spontaneous or induced mutations. In addition, DNA pol…
NODE_1_length_167096_cov_338.28	gene_196	131929	134625	-	cd05783	107	326	6e-12	64.3	0.87	DEDDy 3'-5' exonuclease domain of Sulfolobus solfataricus DNA polymerase B1 and similar archaeal family-B DNA polymerases. The 3'-5' exonuclease domain of Sulfolobus solfataricus DNA polymerase B1 and similar archaeal proteins. B1 is a family-B DNA polymerase. Family-B DNA polymerases contain an N-terminal DEDDy DnaQ-like exonuclease domain in the same polypeptide chain as the polymerase domain, …
NODE_1_length_167096_cov_338.28	gene_196	131929	134625	-	cd05784	188	328	2e-11	62.2	0.69	DEDDy 3'-5' exonuclease domain of Escherichia coli DNA polymerase II and similar bacterial family-B DNA polymerases. The 3'-5' exonuclease domain of Escherichia coli DNA polymerase II (Pol II) and similar bacterial proteins. Pol II is a family-B DNA polymerase. Family-B DNA polymerases contain an N-terminal DEDDy DnaQ-like exonuclease domain in the same polypeptide chain as the polymerase domain,…
NODE_1_length_167096_cov_338.28	gene_196	131929	134625	-	cd05785	191	331	6e-09	54.7	0.66	Uncharacterized bacterial subgroup of the DEDDy 3'-5' exonuclease domain of family-B DNA polymerases. A subfamily of the 3'-5' exonuclease domain of family-B DNA polymerases. This subfamily is composed of uncharacterized bacterial family-B DNA polymerases. Family-B DNA polymerases contain an N-terminal DEDDy DnaQ-like exonuclease domain in the same polypeptide chain as the polymerase domain, simi…
NODE_1_length_167096_cov_338.28	gene_196	131929	134625	-	smart00486	107	627	1e-66	226	0.93	DNA polymerase type-B family. DNA polymerase alpha, delta, epsilon and zeta chain (eukaryota), DNA polymerases in archaea, DNA polymerase II in e. coli, mitochondrial DNA polymerases and and virus DNA polymerases
NODE_1_length_167096_cov_338.28	gene_198	134927	135295	-	PF01818.16	1	121	1.2e-75	251.2	1	Bacteriophage translational regulator
NODE_1_length_167096_cov_338.28	gene_199	135297	135860	-	PF16790.4	37	173	1.3e-80	268.4	1	Bacteriophage clamp loader A subunit
NODE_1_length_167096_cov_338.28	gene_200	135862	136821	-	COG0470	126	275	2e-09	53.9	0.63	DNA polymerase III, delta prime subunit [Replication, recombination and repair].
NODE_1_length_167096_cov_338.28	gene_200	135862	136821	-	COG1222	25	194	1e-05	43.4	0.39	ATP-dependent 26S proteasome regulatory subunit [Posttranslational modification, protein turnover, chaperones].
NODE_1_length_167096_cov_338.28	gene_200	135862	136821	-	COG2256	16	237	4e-13	66.5	0.49	Replication-associated recombination protein RarA (DNA-dependent ATPase) [Replication, recombination and repair].
NODE_1_length_167096_cov_338.28	gene_200	135862	136821	-	COG2812	11	274	1e-08	53.2	0.46	DNA polymerase III, gamma/tau subunits [Replication, recombination and repair].
NODE_1_length_167096_cov_338.28	gene_200	135862	136821	-	PF00004.28	47	156	5.1e-14	52.7	0.962121	ATPase family associated with various cellular activities (AAA)
NODE_1_length_167096_cov_338.28	gene_200	135862	136821	-	PRK00440	6	218	1e-32	122	0.64	replication factor C small subunit; Reviewed
NODE_1_length_167096_cov_338.28	gene_200	135862	136821	-	PRK04132	57	213	1e-12	66	0.18	replication factor C small subunit; Provisional
NODE_1_length_167096_cov_338.28	gene_200	135862	136821	-	PRK04195	14	286	2e-19	86.1	0.52	replication factor C large subunit; Provisional
NODE_1_length_167096_cov_338.28	gene_200	135862	136821	-	PRK07133	11	61	3e-06	46.3	0.08	DNA polymerase III subunits gamma and tau; Validated
NODE_1_length_167096_cov_338.28	gene_200	135862	136821	-	PRK12402	14	313	3e-23	95.8	0.86	replication factor C small subunit 2; Reviewed
NODE_1_length_167096_cov_338.28	gene_200	135862	136821	-	PRK13342	11	232	5e-12	64	0.5	recombination factor protein RarA; Reviewed
NODE_1_length_167096_cov_338.28	gene_200	135862	136821	-	PRK14953	13	249	4e-11	61.4	0.47	DNA polymerase III subunits gamma and tau; Provisional
NODE_1_length_167096_cov_338.28	gene_200	135862	136821	-	PRK14962	11	273	7e-10	57.5	0.5	DNA polymerase III subunits gamma and tau; Provisional
NODE_1_length_167096_cov_338.28	gene_200	135862	136821	-	cd00009	30	155	8e-11	57.5	0.83	The AAA+ (ATPases Associated with a wide variety of cellular Activities) superfamily represents an ancient group of ATPases belonging to the ASCE (for additional strand, catalytic E) division of the P-loop NTPase fold. The ASCE division also includes ABC, RecA-like, VirD4-like, PilT-like, and SF1/2 helicases. Members of the AAA+ ATPases function as molecular chaperons, ATPase subunits of protease…
NODE_1_length_167096_cov_338.28	gene_200	135862	136821	-	smart00382	44	161	3e-08	46.2	0.8	ATPases associated with a variety of cellular activities. AAA - ATPases associated with a variety of cellular activities. This profile/alignment only detects a fraction of this vast family. The poorly conserved N-terminal helix is missing from the alignment.
NODE_1_length_167096_cov_338.28	gene_201	136873	137559	-	PF09116.9	115	222	2e-51	172.4	1	gp45 sliding clamp, C terminal
NODE_1_length_167096_cov_338.28	gene_204	138258	139898	-	COG0419	18	377	6e-22	97.1	0.37	DNA repair exonuclease SbcCD ATPase subunit [Replication, recombination and repair].
NODE_1_length_167096_cov_338.28	gene_204	138258	139898	-	COG0419	140	525	6e-10	59	0.41	DNA repair exonuclease SbcCD ATPase subunit [Replication, recombination and repair].
NODE_1_length_167096_cov_338.28	gene_204	138258	139898	-	COG1196	149	524	1e-06	48.2	0.3	Chromosome segregation ATPase [Cell cycle control, cell division, chromosome partitioning].
NODE_1_length_167096_cov_338.28	gene_204	138258	139898	-	PF13476.5	16	207	2.2e-10	41.3	0.785	AAA domain
NODE_1_length_167096_cov_338.28	gene_204	138258	139898	-	PRK01156	18	376	7e-09	56.4	0.4	chromosome segregation protein; Provisional
NODE_1_length_167096_cov_338.28	gene_204	138258	139898	-	PRK02224	18	376	3e-09	57.7	0.37	chromosome segregation protein; Provisional
NODE_1_length_167096_cov_338.28	gene_204	138258	139898	-	PRK03918	19	389	1e-08	55.8	0.39	chromosome segregation protein; Provisional
NODE_1_length_167096_cov_338.28	gene_204	138258	139898	-	cd00267	6	40	4e-05	41.8	0.23	ATP-binding cassette transporter nucleotide-binding domain. ABC transporters are a large family of proteins involved in the transport of a wide variety of different compounds, like sugars, ions, peptides, and more complex organic molecules. The nucleotide-binding domain shows the highest similarity between all members of the family. ABC transporters are a subset of nucleotide hydrolases that cont…
NODE_1_length_167096_cov_338.28	gene_204	138258	139898	-	cd03227	7	51	8e-07	47	0.28	ATP-binding cassette domain of non-transporter proteins. ABC-type Class 2 contains systems involved in cellular processes other than transport. These families are characterized by the fact that the ABC subunit is made up of duplicated, fused ABC modules (ABC2). No known transmembrane proteins or domains are associated with these proteins.
NODE_1_length_167096_cov_338.28	gene_204	138258	139898	-	cd03240	18	86	4e-07	48.4	0.34	ATP-binding cassette domain of Rad50. The catalytic domains of Rad50 are similar to the ATP-binding cassette of ABC transporters, but are not associated with membrane-spanning domains. The conserved ATP-binding motifs common to Rad50 and the ABC transporter family include the Walker A and Walker B motifs, the Q loop, a histidine residue in the switch region, a D-loop, and a conserved LSGG sequenc…
NODE_1_length_167096_cov_338.28	gene_204	138258	139898	-	cd03279	7	124	7e-10	56.9	0.41	ATP-binding cassette domain of sbcCD. SbcCD and other Mre11/Rad50 (MR) complexes are implicated in the metabolism of DNA ends. They cleave ends sealed by hairpin structures and are thought to play a role in removing protein bound to DNA termini.
NODE_1_length_167096_cov_338.28	gene_204	138258	139898	-	cd03279	419	538	4e-09	54.6	0.56	ATP-binding cassette domain of sbcCD. SbcCD and other Mre11/Rad50 (MR) complexes are implicated in the metabolism of DNA ends. They cleave ends sealed by hairpin structures and are thought to play a role in removing protein bound to DNA termini.
NODE_1_length_167096_cov_338.28	gene_205	139937	140143	-	PF17589.1	1	66	8.9e-40	134.7	1	Family of unknown function (DUF5487)
NODE_1_length_167096_cov_338.28	gene_207	140384	141403	-	COG0420	1	311	2e-10	58.7	0.78	DNA repair exonuclease SbcCD nuclease subunit [Replication, recombination and repair].
NODE_1_length_167096_cov_338.28	gene_207	140384	141403	-	PF00149.27	1	174	6.5e-07	30	0.622549	Calcineurin-like phosphoesterase
NODE_1_length_167096_cov_338.28	gene_207	140384	141403	-	cd00840	2	86	7e-08	49.6	0.46	Mre11 nuclease, N-terminal metallophosphatase domain. Mre11 (also known as SbcD in Escherichia coli) is a subunit of the MRX protein complex. This complex includes: Mre11, Rad50, and Xrs2/Nbs1, and plays a vital role in several nuclear processes including DNA double-strand break repair, telomere length maintenance, cell cycle checkpoint control, and meiotic recombination, in eukaryotes. During do…
NODE_1_length_167096_cov_338.28	gene_208	141580	142782	-	PF11440.7	14	368	1.4e-237	787.4	1	DNA alpha-glucosyltransferase
NODE_1_length_167096_cov_338.28	gene_210	143199	143516	-	PF10849.7	26	95	5.7e-43	144.9	1	Protein of unknown function (DUF2654)
NODE_1_length_167096_cov_338.28	gene_216	145220	145420	-	PF17593.1	1	62	2.1e-49	165.3	1	Family of unknown function (DUF5490)
NODE_1_length_167096_cov_338.28	gene_223	146826	147296	-	COG0602	10	145	3e-25	95.5	0.62	Organic radical activating enzyme [General function prediction only].
NODE_1_length_167096_cov_338.28	gene_223	146826	147296	-	COG1180	1	148	7e-08	47.3	0.52	Pyruvate-formate lyase-activating enzyme [Posttranslational modification, protein turnover, chaperones].
NODE_1_length_167096_cov_338.28	gene_223	146826	147296	-	PF13353.5	12	145	4.6e-46	156.4	0.992806	4Fe-4S single cluster domain
NODE_1_length_167096_cov_338.28	gene_223	146826	147296	-	PRK11121	1	143	3e-60	185	0.93	anaerobic ribonucleotide reductase-activating protein; Provisional
NODE_1_length_167096_cov_338.28	gene_223	146826	147296	-	PRK11145	6	52	1e-07	46.9	0.2	pyruvate formate lyase-activating enzyme 1; Provisional
NODE_1_length_167096_cov_338.28	gene_223	146826	147296	-	TIGR02491	2	148	1.4e-59	198.4	0.993506	NrdG: anaerobic ribonucleoside-triphosphate reductase activating protein
NODE_1_length_167096_cov_338.28	gene_223	146826	147296	-	cd01335	20	83	6e-06	42.3	0.32	Radical SAM superfamily. Enzymes of this family generate radicals by combining a 4Fe-4S cluster and S-adenosylmethionine (SAM) in close proximity. They are characterized by a conserved CxxxCxxC motif, which coordinates the conserved iron-sulfur cluster. Mechanistically, they share the transfer of a single electron from the iron-sulfur cluster to SAM, which leads to its reductive cleavage to methi…
NODE_1_length_167096_cov_338.28	gene_224	147293	149110	-	COG1328	3	604	0	672	0.84	Anaerobic ribonucleoside-triphosphate reductase [Nucleotide transport and metabolism].
NODE_1_length_167096_cov_338.28	gene_224	147293	149110	-	NF006732.0	2	604	1.8e-273	908.6	0.855337	PRK09263.1: anaerobic ribonucleoside-triphosphate reductase
NODE_1_length_167096_cov_338.28	gene_224	147293	149110	-	PF13597.5	21	604	1.1e-167	559.2	1	Anaerobic ribonucleoside-triphosphate reductase
NODE_1_length_167096_cov_338.28	gene_224	147293	149110	-	PRK07111	11	604	2e-131	404	0.78	anaerobic ribonucleoside triphosphate reductase; Provisional
NODE_1_length_167096_cov_338.28	gene_224	147293	149110	-	PRK08270	37	488	9e-20	91.1	0.55	anaerobic ribonucleoside triphosphate reductase; Provisional
NODE_1_length_167096_cov_338.28	gene_224	147293	149110	-	PRK08271	314	605	1e-07	52.3	0.4	anaerobic ribonucleoside triphosphate reductase; Provisional
NODE_1_length_167096_cov_338.28	gene_224	147293	149110	-	PRK09263	2	604	0	1047	0.84	anaerobic ribonucleoside triphosphate reductase; Provisional
NODE_1_length_167096_cov_338.28	gene_224	147293	149110	-	PRK14704	1	604	7e-126	386	0.95	anaerobic ribonucleoside triphosphate reductase; Provisional
NODE_1_length_167096_cov_338.28	gene_224	147293	149110	-	TIGR02487	20	604	2.3e-170	565.9	1	NrdD: anaerobic ribonucleoside-triphosphate reductase
NODE_1_length_167096_cov_338.28	gene_224	147293	149110	-	cd00576	51	538	9e-109	334	0.96	Ribonucleotide reductase and Pyruvate formate lyase. Ribonucleotide reductase (RNR) and pyruvate formate lyase (PFL) are believed to have diverged from a common ancestor. They have a structurally similar ten-stranded alpha-beta barrel domain that hosts the active site, and are radical enzymes. RNRs are found in all organisms and provide the only mechanism by which nucleotides are converted to deo…
NODE_1_length_167096_cov_338.28	gene_224	147293	149110	-	cd01675	21	584	0	656	0.94	Class III ribonucleotide reductase. Ribonucleotide reductase (RNR) catalyzes the reductive synthesis of deoxyribonucleotides from their corresponding ribonucleotides. It provides the precursors necessary for DNA synthesis. RNRs are separated into three classes based on their metallocofactor usage. Class I RNRs, found in eukaryotes, bacteria, and bacteriophage, use a diiron-tyrosyl radical. Class …
NODE_1_length_167096_cov_338.28	gene_225	149107	149580	-	PF09124.9	104	157	2.2e-33	114.1	1	T4 recombination endonuclease VII, dimerisation
NODE_1_length_167096_cov_338.28	gene_230	150947	151210	-	COG0695	13	87	4e-08	44.2	0.83	Glutaredoxin [Posttranslational modification, protein turnover, chaperones].
NODE_1_length_167096_cov_338.28	gene_230	150947	151210	-	PF00462.23	12	76	5.2e-08	32.9	0.9	Glutaredoxin
NODE_1_length_167096_cov_338.28	gene_230	150947	151210	-	PRK10638	14	82	1e-07	43.3	0.7	glutaredoxin 3; Provisional
NODE_1_length_167096_cov_338.28	gene_230	150947	151210	-	PRK11200	1	87	6e-05	35.8	0.84	glutaredoxin 1; Provisional
NODE_1_length_167096_cov_338.28	gene_230	150947	151210	-	cd02066	14	87	1e-09	49	0.88	Glutaredoxin (GRX) family; composed of GRX, approximately 10 kDa in size, and proteins containing a GRX or GRX-like domain. GRX is a glutathione (GSH) dependent reductase, catalyzing the disulfide reduction of target proteins such as ribonucleotide reductase. It contains a redox active CXXC motif in a TRX fold and uses a similar dithiol mechanism employed by TRXs for intramolecular disulfide bond…
NODE_1_length_167096_cov_338.28	gene_230	150947	151210	-	cd02976	14	80	2e-05	36.8	0.77	NrdH-redoxin (NrdH) family; NrdH is a small monomeric protein with a conserved redox active CXXC motif within a TRX fold, characterized by a glutaredoxin (GRX)-like sequence and TRX-like activity profile. In vitro, it displays protein disulfide reductase activity that is dependent on TRX reductase, not glutathione (GSH). It is part of the NrdHIEF operon, where NrdEF codes for class Ib ribonucleot…
NODE_1_length_167096_cov_338.28	gene_230	150947	151210	-	cd03029	14	86	7e-06	38.3	0.85	Glutaredoxin (GRX) family, PRX5 hybrid subfamily; composed of hybrid proteins containing peroxiredoxin (PRX) and GRX domains, which is found in some pathogenic bacteria and cyanobacteria. PRXs are thiol-specific antioxidant (TSA) proteins that confer a protective antioxidant role in cells through their peroxidase activity in which hydrogen peroxide, peroxynitrate, and organic hydroperoxides are r…
NODE_1_length_167096_cov_338.28	gene_230	150947	151210	-	cd03418	14	82	1e-10	51.4	0.79	Glutaredoxin (GRX) family, GRX bacterial class 1 and 3 (b_1_3)-like subfamily; composed of bacterial GRXs, approximately 10 kDa in size, and proteins containing a GRX or GRX-like domain. GRX is a glutathione (GSH) dependent reductase, catalyzing the disulfide reduction of target proteins such as ribonucleotide reductase. It contains a redox active CXXC motif in a TRX fold and uses a similar dithi…
NODE_1_length_167096_cov_338.28	gene_230	150947	151210	-	cd03419	14	87	3e-05	36.4	0.77	Glutaredoxin (GRX) family, GRX human class 1 and 2 (h_1_2)-like subfamily; composed of proteins similar to human GRXs, approximately 10 kDa in size, and proteins containing a GRX or GRX-like domain. GRX is a glutathione (GSH) dependent reductase, catalyzing the disulfide reduction of target proteins such as ribonucleotide reductase. It contains a redox active CXXC motif in a TRX fold and uses a s…
NODE_1_length_167096_cov_338.28	gene_241	158351	159361	-	PF10127.8	6	138	3.7e-13	49.5	0.506122	Predicted nucleotidyltransferase
NODE_1_length_167096_cov_338.28	gene_252	162869	163450	-	COG1435	1	191	8e-89	260	0.96	Thymidine kinase [Nucleotide transport and metabolism].
NODE_1_length_167096_cov_338.28	gene_252	162869	163450	-	NF003300.0	1	189	3.8e-80	267.6	0.984536	PRK04296.1-5: thymidine kinase
NODE_1_length_167096_cov_338.28	gene_252	162869	163450	-	PF00265.17	3	185	4.3e-62	209	0.99435	Thymidine kinase
NODE_1_length_167096_cov_338.28	gene_252	162869	163450	-	PRK04296	1	190	1e-96	280	0.99	thymidine kinase; Provisional
NODE_1_length_167096_cov_338.28	gene_257	164224	164691	-	COG2110	1	136	2e-16	70.5	0.74	O-acetyl-ADP-ribose deacetylase (regulator of RNase III), contains Macro domain [Translation, ribosomal structure and biogenesis].
NODE_1_length_167096_cov_338.28	gene_257	164224	164691	-	PF01661.20	22	134	5.5e-08	32.8	0.966102	Macro domain
NODE_1_length_167096_cov_338.28	gene_257	164224	164691	-	cd02901	1	140	4e-23	88.9	0.98	Macro domain, Poa1p_like family. The macro domain is a high-affinity ADP-ribose binding module found in a variety of proteins as a stand-alone domain or in combination with other domains like in histone macroH2A and some PARPs (poly ADP-ribose polymerases). Some macro domains recognize poly ADP-ribose as a ligand. Previously identified as displaying an Appr-1"-p (ADP-ribose-1"-monophosphate) proc…
NODE_1_length_167096_cov_338.28	gene_257	164224	164691	-	smart00506	2	137	2e-34	114	1	Appr-1"-p processing enzyme. Function determined by Martzen et al. Extended family detected by reciprocal PSI-BLAST searches (unpublished results, and Pehrson & Fuji).
NODE_1_length_167096_cov_338.28	gene_259	165022	165567	-	PF01464.19	61	153	7.9e-06	25.4	0.726496	Transglycosylase SLT domain
NODE_1_length_167096_cov_338.28	gene_259	165022	165567	-	cd00254	61	172	8e-05	38.2	0.92	Lytic Transglycosylase (LT) and Goose Egg White Lysozyme (GEWL) domain. Members include the soluble and insoluble membrane-bound LTs in bacteria, the LTs in bacteriophage lambda, as well as, the eukaryotic "goose-type" lysozymes (GEWL). LTs catalyze the cleavage of the beta-1,4-glycosidic bond between N-acetylmuramic acid (MurNAc) and N-acetyl-D-glucosamine (GlcNAc), as do "goose-type" lysozymes.…

## Sheet: ES26_Domains
Contig	Feature	Feature Start in Contig	Feature End in Contig	Feature Direction in Contig	Domain Accession	Domain Start in Feature	Domain End in Feature	E-value	Bit Score	Domain Coverage	Domain Description
NODE_1_length_166950_cov_353.718	gene_3	1750	2166	-	PF03013.13	1	135	1.8e-46	157.3	0.992308	Pyrimidine dimer DNA glycosylase
NODE_1_length_166950_cov_353.718	gene_4	2226	2720	-	PF00959.18	24	148	7.1e-25	87.5	1	Phage lysozyme
NODE_1_length_166950_cov_353.718	gene_4	2226	2720	-	cd00442	2	104	8e-26	95	0.92	lysozyme_like domain. This contains several members including Soluble Lytic Transglycosylases (SLT), Goose Egg-White Lysozymes (GEWL), Hen Egg-White Lysozymes (HEWL), chitinases, bacteriophage lambda lysozymes, endolysins, autolysins, and chitosanases. All the members are involved in the hydrolysis of beta-1,4- linked polysaccharides.
NODE_1_length_166950_cov_353.718	gene_4	2226	2720	-	cd00735	2	162	1e-95	275	0.99	Bacteriophage T4-like lysozymes hydrolyse the beta-1,4-glycosidic bond between N-acetylmuramic acid (MurNAc) and N-acetylglucosamine (GlcNAc) in peptidoglycan heteropolymers of prokaryotic cell walls. Members include a variety of bacteriophages (T4, RB49, RB69, Aeh1) as well as Dictyostelium.
NODE_1_length_166950_cov_353.718	gene_4	2226	2720	-	cd00737	11	138	3e-12	58.8	0.76	Endolysins and autolysins are found in viruses and bacteria, respectively. The ds DNA phages of eubacteria use endolysins or muralytic enzymes in conjunction with hollin, a small membrane protein, to degrade the peptidoglycan found in bacterial cell walls. Similarly, bacteria produce autolysins to facilitate the biosynthesis of its cell wall hetropolymer peptidoglycan and cell division. Both endo…
NODE_1_length_166950_cov_353.718	gene_5	2758	3198	-	COG0494	6	126	3e-08	47.2	0.71	8-oxo-dGTP pyrophosphatase MutT and related house-cleaning NTP pyrophosphohydrolases, NUDIX family [Defense mechanisms].
NODE_1_length_166950_cov_353.718	gene_5	2758	3198	-	PF00293.27	2	130	1.9e-13	50.5	0.931298	NUDIX domain
NODE_1_length_166950_cov_353.718	gene_5	2758	3198	-	PRK10776	1	74	4e-06	41.1	0.54	nucleoside triphosphate pyrophosphohydrolase; Provisional
NODE_1_length_166950_cov_353.718	gene_5	2758	3198	-	cd02883	4	102	2e-10	52.9	0.74	Nudix hydrolase is a superfamily of enzymes found in all three kingdoms of life, and it catalyzes the hydrolysis of NUcleoside DIphosphates linked to other moieties, X. Enzymes belonging to this superfamily require a divalent cation, such as Mg2+ or Mn2+ for their activity. Members of this family are recognized by a highly conserved 23-residue nudix motif (GX5EX7REUXEEXGU, where U = I, L or V), w…
NODE_1_length_166950_cov_353.718	gene_5	2758	3198	-	cd03424	28	82	5e-06	40.9	0.37	ADP-ribose pyrophosphatase (ADPRase) catalyzes the hydrolysis of ADP-ribose and a variety of additional ADP-sugar conjugates to AMP and ribose-5-phosphate. Like other members of the Nudix hydrolase superfamily, it requires a divalent cation, such as Mg2+, for its activity. It also contains a highly conserved 23-residue Nudix motif (GX5EX7REUXEEXGU, where U = I, L or V) which functions as a metal …
NODE_1_length_166950_cov_353.718	gene_5	2758	3198	-	cd03426	26	75	3e-05	39.4	0.3	Coenzyme A pyrophosphatase (CoAse), a member of the Nudix hydrolase superfamily, functions to catalyze the elimination of oxidized inactive CoA, which can inhibit CoA-utilizing enzymes. The need of CoAses mainly arises under conditions of oxidative stress. CoAse has a conserved Nudix fold and requires a single divalent cation for catalysis. In addition to a signature Nudix motif G[X5]E[X7]REUXEEX…
NODE_1_length_166950_cov_353.718	gene_5	2758	3198	-	cd03428	33	80	1e-08	48.4	0.34	Diadenosine tetraphosphate (Ap4A) hydrolase is a member of the Nudix hydrolase superfamily. Ap4A hydrolases are well represented in a variety of prokaryotic and eukaryotic organisms. Phylogenetic analysis reveals two distinct subgroups where plant enzymes fall into one subfamily and fungi/animals/archaea enzymes, represented by this subfamily, fall into another. Bacterial enzymes are found in bot…
NODE_1_length_166950_cov_353.718	gene_5	2758	3198	-	cd03673	35	75	3e-05	38.8	0.29	Diadenosine hexaphosphate (Ap6A) hydrolase is a member of the Nudix hydrolase superfamily. Ap6A hydrolase specifically hydrolyzes diadenosine polyphosphates, but not ATP or diadenosine triphosphate, and it generates ATP as the product. Ap6A, the most preferred substrate, hydrolyzes to produce two ATP molecules, which is a novel hydrolysis mode for Ap6A. These results indicate that Ap6A hydrolase …
NODE_1_length_166950_cov_353.718	gene_5	2758	3198	-	cd04662	4	83	3e-06	41.7	0.54	Members of the Nudix hydrolase superfamily catalyze the hydrolysis of NUcleoside DIphosphates linked to other moieties, X. Enzymes belonging to this superfamily require a divalent cation, such as Mg2+ or Mn2+, for their activity and contain a highly conserved 23-residue nudix motif (GX5EX7REUXEEXGU, where U = I, L or V), which functions as a metal binding and catalytic site. Substrates of nudix h…
NODE_1_length_166950_cov_353.718	gene_5	2758	3198	-	cd04666	22	99	2e-07	44.5	0.54	Members of the Nudix hydrolase superfamily catalyze the hydrolysis of NUcleoside DIphosphates linked to other moieties, X. Enzymes belonging to this superfamily require a divalent cation, such as Mg2+ or Mn2+, for their activity and contain a highly conserved 23-residue nudix motif (GX5EX7REUXEEXGU, where U = I, L or V), which functions as a metal binding and catalytic site. Substrates of nudix h…
NODE_1_length_166950_cov_353.718	gene_5	2758	3198	-	cd04671	34	64	4e-05	38.6	0.25	Members of the Nudix hydrolase superfamily catalyze the hydrolysis of NUcleoside DIphosphates linked to other moieties, X. Enzymes belonging to this superfamily require a divalent cation, such as Mg2+ or Mn2+, for their activity and contain a highly conserved 23-residue nudix motif (GX5EX7REUXEEXGU, where U = I, L or V), which functions as a metal binding and catalytic site. Substrates of nudix h…
NODE_1_length_166950_cov_353.718	gene_5	2758	3198	-	cd04684	20	64	8e-05	37.6	0.35	Contains a crystal structure of the Nudix hydrolase from Enterococcus faecalis, which has an unknown function. In general, members of the Nudix hydrolase superfamily catalyze the hydrolysis of NUcleoside DIphosphates linked to other moieties, X. Enzymes belonging to this superfamily require a divalent cation, such as Mg2+ or Mn2+, for their activity. They also contain a highly conserved 23-residu…
NODE_1_length_166950_cov_353.718	gene_5	2758	3198	-	cd04699	6	64	2e-05	39.7	0.42	Members of the Nudix hydrolase superfamily catalyze the hydrolysis of NUcleoside DIphosphates linked to other moieties, X. Enzymes belonging to this superfamily require a divalent cation, such as Mg2+ or Mn2+, for their activity and contain a highly conserved 23-residue nudix motif (GX5EX7REUXEEXGU, where U = I, L or V), which functions as a metal binding and catalytic site. Substrates of nudix h…
NODE_1_length_166950_cov_353.718	gene_5	2758	3198	-	cd04700	5	62	5e-07	43.7	0.38	DR1025 from Deinococcus radiodurans, a member of the Nudix hydrolase superfamily, show nucleoside triphosphatase and dinucleoside polyphosphate pyrophosphatase activities. Like other enzymes belonging to this superfamily, it requires a divalent cation, in this case Mg2+, for its activity. It also contains a highly conserved 23-residue nudix motif (GX5EX7REUXEEXGU, where U = I, L or V), which func…
NODE_1_length_166950_cov_353.718	gene_15	8592	9200	-	smart00507	20	76	8e-05	34	0.97	HNH nucleases.
NODE_1_length_166950_cov_353.718	gene_25	12867	13397	-	PF06841.11	14	165	4.1e-17	62.2	0.992537	T4-like virus tail tube protein gp19
NODE_1_length_166950_cov_353.718	gene_28	14828	15418	+	PF11246.7	1	187	9.3e-91	302.5	1	Base plate wedge protein 53
NODE_1_length_166950_cov_353.718	gene_29	15402	17129	+	COG3772	184	323	4e-05	41.2	0.72	Phage-related lysozyme (muramidase), GH24 family [Cell wall/membrane/envelope biogenesis].
NODE_1_length_166950_cov_353.718	gene_29	15402	17129	+	PF06714.10	33	173	3.3e-65	218.6	1	Gp5 N-terminal OB domain
NODE_1_length_166950_cov_353.718	gene_29	15402	17129	+	cd00735	175	340	3e-106	318	1	Bacteriophage T4-like lysozymes hydrolyse the beta-1,4-glycosidic bond between N-acetylmuramic acid (MurNAc) and N-acetylglucosamine (GlcNAc) in peptidoglycan heteropolymers of prokaryotic cell walls. Members include a variety of bacteriophages (T4, RB49, RB69, Aeh1) as well as Dictyostelium.
NODE_1_length_166950_cov_353.718	gene_29	15402	17129	+	cd00737	178	304	3e-08	51.1	0.73	Endolysins and autolysins are found in viruses and bacteria, respectively. The ds DNA phages of eubacteria use endolysins or muralytic enzymes in conjunction with hollin, a small membrane protein, to degrade the peptidoglycan found in bacterial cell walls. Similarly, bacteria produce autolysins to facilitate the biosynthesis of its cell wall hetropolymer peptidoglycan and cell division. Both endo…
NODE_1_length_166950_cov_353.718	gene_31	17659	17952	+	PF05488.12	13	88	1.6e-06	28.1	0.971429	PAAR motif
NODE_1_length_166950_cov_353.718	gene_31	17659	17952	+	cd14737	2	97	4e-29	100	1	proline-alanine-alanine-arginine (PAAR) domain. This domain is found in the PAAR (proline-alanine-alanine-arginine) repeat family, where it forms a sharp conical extension on the VgrG spike, a trimeric protein complex of the bacterial type VI secretion system (T6SS). The T6SS is responsible for translocation of a wide variety of toxic effector molecules, allowing predatory cells to kill prokaryot…
NODE_1_length_166950_cov_353.718	gene_33	19940	23038	+	cd00063	8	102	3e-05	42.5	0.93	Fibronectin type 3 domain; One of three types of internal repeats found in the plasma protein fibronectin. Its tenth fibronectin type III repeat contains an RGD cell recognition sequence in a flexible loop between 2 strands. Approximately 2% of all animal proteins contain the FN3 repeat; including extracellular and intracellular proteins, membrane spanning cytokine receptors, growth hormone recep…
NODE_1_length_166950_cov_353.718	gene_35	24099	24965	+	PF07880.10	7	271	4.4e-117	390.6	0.996491	Bacteriophage T4 gp9/10-like protein
NODE_1_length_166950_cov_353.718	gene_36	24965	26770	+	PF07880.10	2	264	9.8e-101	337	0.996491	Bacteriophage T4 gp9/10-like protein
NODE_1_length_166950_cov_353.718	gene_38	27426	28976	+	COG4675	336	406	2e-08	51	0.42	Microcystin-dependent protein (function unknown) [Function unknown].
NODE_1_length_166950_cov_353.718	gene_38	27426	28976	+	PF14928.5	403	514	2.1e-39	134.5	0.941667	Short tail fibre protein receptor-binding domain
NODE_1_length_166950_cov_353.718	gene_39	28986	30443	+	PF07921.11	371	481	1e-34	118.4	0.989247	Fibritin C-terminal region
NODE_1_length_166950_cov_353.718	gene_41	31406	32176	+	PF11649.7	3	249	3.9e-135	449.5	0.928058	Virus neck protein
NODE_1_length_166950_cov_353.718	gene_42	32218	33036	+	PF16724.4	1	234	2.1e-143	476	1	T4-like virus Myoviridae tail sheath stabiliser
NODE_1_length_166950_cov_353.718	gene_43	33045	33539	+	PF11053.7	1	149	1.6e-87	291.2	1	Terminase DNA packaging enzyme
NODE_1_length_166950_cov_353.718	gene_44	33523	35355	+	PF17289.1	399	572	1.7e-44	151.5	0.987097	Terminase RNaseH-like domain
NODE_1_length_166950_cov_353.718	gene_45	35387	37366	+	COG3497	405	645	9e-08	51.6	0.6	Phage tail sheath protein FI [Mobilome: prophages, transposons].
NODE_1_length_166950_cov_353.718	gene_45	35387	37366	+	PF04984.13	348	541	1.9e-46	157.9	1	Phage tail sheath protein subtilisin-like domain
NODE_1_length_166950_cov_353.718	gene_46	37483	37974	+	PF06841.11	19	163	1.1e-16	60.9	0.985075	T4-like virus tail tube protein gp19
NODE_1_length_166950_cov_353.718	gene_47	38058	39632	+	PF07230.10	6	508	0	1044.8	1	Bacteriophage T4-like capsid assembly protein (Gp20)
NODE_1_length_166950_cov_353.718	gene_50	40302	40940	+	PF03420.12	6	190	2.1e-116	386	1	Prohead core protein serine protease
NODE_1_length_166950_cov_353.718	gene_52	41799	43364	+	PF07068.10	9	501	0	1025	1	Major capsid protein Gp23
NODE_1_length_166950_cov_353.718	gene_53	43448	44731	+	PF07068.10	150	232	4.2e-09	35.6	0.163065	Major capsid protein Gp23
NODE_1_length_166950_cov_353.718	gene_54	44761	45768	-	PF09414.9	29	228	4.3e-24	85.5	0.993789	RNA ligase
NODE_1_length_166950_cov_353.718	gene_54	44761	45768	-	TIGR02307	2	335	1.6e-122	407.1	1	RNA_lig_RNL2: RNA ligase, Rnl2 family
NODE_1_length_166950_cov_353.718	gene_56	46043	46228	-	PF11242.7	2	58	5.2e-29	100.1	0.904762	Protein of unknown function (DUF2774)
NODE_1_length_166950_cov_353.718	gene_57	46348	47772	-	PF00801.19	111	175	7e-08	32.1	0.830986	PKD domain
NODE_1_length_166950_cov_353.718	gene_57	46348	47772	-	PF00801.19	204	273	1.9e-13	50	0.901408	PKD domain
NODE_1_length_166950_cov_353.718	gene_59	48512	49129	+	PF01541.23	2	72	8.1e-05	22.7	0.897436	GIY-YIG catalytic domain
NODE_1_length_166950_cov_353.718	gene_59	48512	49129	+	cd10437	5	64	1e-05	40.7	0.65	N-terminal catalytic domain of GIY-YIG intron endonuclease I-TevI, I-BmoI, I-BanI, I-BthII and similar proteins. I-TevI is a site-specific GIY-YIG homing endonuclease encoded within the group I intron of the thymidylate synthase gene (td) from Escherichia coli phage T4. It functions as an endonuclease that catalyzes the first step in intron homing by generating a double-strand break in the intron…
NODE_1_length_166950_cov_353.718	gene_59	48512	49129	+	cd10443	3	63	3e-06	41.9	0.67	GIY-YIG domain of uncharacterized hypothetical protein found in phycodnavirus PBCV-1 DNA virus, T. thermophila Tlr element eoncoding protein Tlr8p, and similar proteins found in bacteria. The family includes a group of diverse uncharacterized hypothetical proteins with a GIY-YIG domain that shows statistically significant similarity to the N-terminal catalytic domains of GIY-YIG family of intron-…
NODE_1_length_166950_cov_353.718	gene_59	48512	49129	+	cd10444	4	85	1e-26	97.8	0.97	N-terminal catalytic GIY-YIG domain of bacteriophage T4 segABCDEFG gene encoding proteins. The prototypes of Seg family are proteins SegA, B, C, D, E, F, and G encoded by five seg genes segA, B, C, D, E, F, and G in the bacteriophage T4 genome, respectively. SegA, B, C, D, E, F, and G are not encoded by introns, but free-standing homologs of the GIY-YIG family of endonucleases encoded by group I …
NODE_1_length_166950_cov_353.718	gene_59	48512	49129	+	cd10445	5	54	2e-06	42.6	0.55	Catalytic GIY-YIG domain of putative intron-encoded endonuclease bI1 and similar proteins. The prototype of this family is a putative intron-encoded mitochondrial DNA endonuclease bI1 found in mitochondrion Ustilago maydis. This protein may arise from proteolytic cleavage of an in-frame translation of COB exon 1 plus intron 1, containing the bI1 open reading frame. It contains an N-terminal trunc…
NODE_1_length_166950_cov_353.718	gene_59	48512	49129	+	smart00465	2	60	5e-06	37.8	0.7	GIY-YIG type nucleases (URI domain).
NODE_1_length_166950_cov_353.718	gene_60	49132	50640	+	COG1061	117	457	9e-31	121	0.75	Superfamily II DNA or RNA helicase [Transcription, Replication, recombination and repair].
NODE_1_length_166950_cov_353.718	gene_60	49132	50640	+	COG1111	112	239	2e-08	53.5	0.24	ERCC4-related helicase [Replication, recombination and repair].
NODE_1_length_166950_cov_353.718	gene_60	49132	50640	+	COG1204	117	247	9e-09	55.1	0.17	Replicative superfamily II helicase [Replication, recombination and repair].
NODE_1_length_166950_cov_353.718	gene_60	49132	50640	+	COG4096	98	456	5e-10	59	0.4	Type I site-specific restriction endonuclease, part of a restriction-modification system [Defense mechanisms].
NODE_1_length_166950_cov_353.718	gene_60	49132	50640	+	PF04851.14	127	260	2.5e-14	53.6	0.847953	Type III restriction enzyme, res subunit
NODE_1_length_166950_cov_353.718	gene_60	49132	50640	+	PRK13766	135	239	1e-06	49.1	0.13	Hef nuclease; Provisional
NODE_1_length_166950_cov_353.718	gene_60	49132	50640	+	cd00046	129	262	4e-11	59.7	0.94	DEAD-like helicases superfamily. A diverse family of proteins involved in ATP-dependent RNA or DNA unwinding. This domain contains the ATP-binding region.
NODE_1_length_166950_cov_353.718	gene_60	49132	50640	+	cd00079	330	447	4e-11	59.6	0.89	Helicase superfamily c-terminal domain; associated with DEXDc-, DEAD-, and DEAH-box proteins, yeast initiation factor 4A, Ski2p, and Hepatitis C virus NS3 helicases; this domain is found in a wide variety of helicases and helicase related proteins; may not be an autonomously folding unit, but an integral part of the helicase; 4 helicase superfamilies at present according to the organization of th…
NODE_1_length_166950_cov_353.718	gene_60	49132	50640	+	smart00487	109	280	5e-18	77.1	0.85	DEAD-like helicases superfamily.
NODE_1_length_166950_cov_353.718	gene_60	49132	50640	+	smart00490	365	443	2e-08	46.4	0.96	helicase superfamily c-terminal domain.
NODE_1_length_166950_cov_353.718	gene_61	50666	50896	+	PF11637.7	21	74	1.9e-30	104.6	1	ATP-dependant DNA helicase UvsW
NODE_1_length_166950_cov_353.718	gene_62	50952	51119	-	PF10886.7	3	55	1e-34	118.4	1	Protein of unknown function (DUF2685)
NODE_1_length_166950_cov_353.718	gene_64	51372	51785	-	PF11056.7	9	137	2.4e-50	170.1	1	Recombination, repair and ssDNA binding protein UvsY
NODE_1_length_166950_cov_353.718	gene_65	51852	52250	-	COG3628	28	100	7e-10	50.5	0.63	Phage baseplate assembly protein W [Mobilome: prophages, transposons].
NODE_1_length_166950_cov_353.718	gene_65	51852	52250	-	PF04965.13	30	116	3.3e-16	58.7	0.947368	Gene 25-like lysozyme
NODE_1_length_166950_cov_353.718	gene_66	52250	52876	-	PF12322.7	4	206	6.8e-71	237.9	1	T4 bacteriophage base plate protein
NODE_1_length_166950_cov_353.718	gene_67	52927	53676	+	PF12322.7	5	201	6.7e-65	218.3	1	T4 bacteriophage base plate protein
NODE_1_length_166950_cov_353.718	gene_69	54871	55329	+	PF11110.7	1	151	2.7e-106	351.9	0.980519	Baseplate hub distal subunit
NODE_1_length_166950_cov_353.718	gene_71	57107	58201	+	PF11091.7	5	358	2.2e-160	533.2	0.994253	Tail-tube assembly protein
NODE_1_length_166950_cov_353.718	gene_72	58201	59166	+	PF06841.11	154	247	2.3e-05	24.2	0.619403	T4-like virus tail tube protein gp19
NODE_1_length_166950_cov_353.718	gene_73	59195	59485	-	PF17602.1	1	96	1.1e-64	214.9	1	Family of unknown function (DUF5498)
NODE_1_length_166950_cov_353.718	gene_74	59546	61603	-	PF03496.13	410	617	2e-24	85.9	0.898477	ADP-ribosyltransferase exoenzyme
NODE_1_length_166950_cov_353.718	gene_74	59546	61603	-	cd00233	417	622	7e-15	72.4	0.78	VIP2; A family of actin-ADP-ribosylating toxin. A member of the Bacillus-prodiced vegetative insecticidal proteins (VIPs) possesses high specificity against the major insect pest, corn rootworms, and belongs to a classs of binary toxins and regulators of biological pathways distinct from classical A-B toxins. A novel family of insecticidal ADP-ribosyltransferses were isolated from Bacillus cereus…
NODE_1_length_166950_cov_353.718	gene_75	61607	63661	-	PF03496.13	374	615	1.1e-56	191.3	1	ADP-ribosyltransferase exoenzyme
NODE_1_length_166950_cov_353.718	gene_75	61607	63661	-	cd00233	381	612	2e-48	167	0.92	VIP2; A family of actin-ADP-ribosylating toxin. A member of the Bacillus-prodiced vegetative insecticidal proteins (VIPs) possesses high specificity against the major insect pest, corn rootworms, and belongs to a classs of binary toxins and regulators of biological pathways distinct from classical A-B toxins. A novel family of insecticidal ADP-ribosyltransferses were isolated from Bacillus cereus…
NODE_1_length_166950_cov_353.718	gene_77	63899	65362	-	COG1793	134	480	3e-17	80.9	0.66	ATP-dependent DNA ligase [Replication, recombination and repair].
NODE_1_length_166950_cov_353.718	gene_77	63899	65362	-	PF01068.20	135	367	3.2e-44	150.9	1	ATP dependent DNA ligase domain
NODE_1_length_166950_cov_353.718	gene_77	63899	65362	-	PRK01109	124	411	2e-06	48	0.41	ATP-dependent DNA ligase; Provisional
NODE_1_length_166950_cov_353.718	gene_77	63899	65362	-	PRK09125	277	412	1e-06	47.9	0.45	DNA ligase; Provisional
NODE_1_length_166950_cov_353.718	gene_77	63899	65362	-	cd07896	136	367	2e-09	54.5	0.97	Adenylation domain of kDNA ligases and similar proteins. The mitochondrial DNA of parasitic protozoans is highly unusual. It is termed the kinetoplast DNA (kDNA) and consists of circular DNA molecules (maxicircles) and several thousand smaller circular molecules (minicircles). This group is composed of kDNA ligase, Chlorella virus DNA ligase, and similar proteins. kDNA ligase and Chlorella virus …
NODE_1_length_166950_cov_353.718	gene_77	63899	65362	-	cd07901	298	367	6e-06	44.8	0.34	Adenylation domain of archaeal and bacterial LigB-like DNA ligases. ATP-dependent polynucleotide ligases catalyze phosphodiester bond formation using nicked nucleic acid substrates with the high energy nucleotide of ATP as a cofactor in a three step reaction mechanism. DNA ligases play a vital role in the diverse processes of DNA replication, recombination and repair. ATP-dependent ligases are pr…
NODE_1_length_166950_cov_353.718	gene_77	63899	65362	-	cd07903	136	367	6e-05	42.2	0.87	Adenylation domain of DNA Ligase IV. ATP-dependent polynucleotide ligases catalyze phosphodiester bond formation using nicked nucleic acid substrates with the high energy nucleotide of ATP as a cofactor in a three step reaction mechanism. DNA ligases play a vital role in the diverse processes of DNA replication, recombination and repair. ATP-dependent ligases are present in many organisms such as…
NODE_1_length_166950_cov_353.718	gene_80	66488	66868	-	PF08010.10	1	124	3.4e-58	195.2	0.884058	Bacteriophage protein GP30.3
NODE_1_length_166950_cov_353.718	gene_85	68101	68433	-	PF06019.10	1	110	4.7e-57	191.1	1	Phage GP30.8 protein
NODE_1_length_166950_cov_353.718	gene_88	69516	69851	-	PF00166.20	8	110	3e-15	55.9	1	Chaperonin 10 Kd subunit
NODE_1_length_166950_cov_353.718	gene_88	69516	69851	-	cd00320	8	110	2e-07	43.3	0.93	Chaperonin 10 Kd subunit (cpn10 or GroES); Cpn10 cooperates with chaperonin 60 (cpn60 or GroEL), an ATPase, to assist the folding and assembly of proteins and is found in eubacterial cytosol, as well as in the matrix of mitochondria and chloroplasts. It forms heptameric rings with a dome-like structure, forming a lid to the large cavity of the tetradecameric cpn60 cylinder and thereby tightly reg…
NODE_1_length_166950_cov_353.718	gene_89	69908	70216	-	PF10902.7	13	86	4.9e-19	68.4	0.986486	WYL_2, Sm-like SH3 beta-barrel fold
NODE_1_length_166950_cov_353.718	gene_91	70453	71034	-	COG0117	24	183	2e-14	65	0.68	Pyrimidine deaminase domain of riboflavin biosynthesis protein RibD [Coenzyme transport and metabolism].
NODE_1_length_166950_cov_353.718	gene_91	70453	71034	-	COG0590	104	168	9e-15	66.2	0.43	tRNA(Arg) A34 adenosine deaminase TadA [Translation, ribosomal structure and biogenesis].
NODE_1_length_166950_cov_353.718	gene_91	70453	71034	-	COG2131	1	179	3e-41	137	0.91	Deoxycytidylate deaminase [Nucleotide transport and metabolism].
NODE_1_length_166950_cov_353.718	gene_91	70453	71034	-	PF00383.22	3	151	6.6e-38	128.6	0.970297	Cytidine and deoxycytidylate deaminase zinc-binding region
NODE_1_length_166950_cov_353.718	gene_91	70453	71034	-	PRK10786	102	148	5e-06	43.6	0.12	bifunctional diaminohydroxyphosphoribosylaminopyrimidine deaminase/5-amino-6-(5-phosphoribosylamino)uracil reductase; Provisional
NODE_1_length_166950_cov_353.718	gene_91	70453	71034	-	PRK10860	104	149	3e-05	40.6	0.25	tRNA-specific adenosine deaminase; Provisional
NODE_1_length_166950_cov_353.718	gene_91	70453	71034	-	cd00786	102	145	4e-10	52.6	0.45	Cytidine and deoxycytidylate deaminase zinc-binding region. The family contains cytidine deaminases, nucleoside deaminases, deoxycytidylate deaminases and riboflavin deaminases. Also included are the apoBec family of mRNA editing enzymes. All members are Zn dependent. The zinc ion in the active site plays a central role in the proposed catalytic mechanism, activating a water molecule to form a hy…
NODE_1_length_166950_cov_353.718	gene_91	70453	71034	-	cd01284	104	168	3e-12	59.2	0.54	Riboflavin-specific deaminase. Riboflavin biosynthesis protein RibD (Diaminohydroxyphosphoribosylaminopyrimidine deaminase) catalyzes the deamination of 2,5-diamino-6-ribosylamino-4(3H)-pyrimidinone 5'-phosphate, which is an intermediate step in the biosynthesis of riboflavin.The ribG gene of Bacillus subtilis and the ribD gene of E. coli are bifunctional and contain this deaminase domain and a r…
NODE_1_length_166950_cov_353.718	gene_91	70453	71034	-	cd01285	104	152	1e-13	62.6	0.45	Nucleoside deaminases include adenosine, guanine and cytosine deaminases. These enzymes are Zn dependent and catalyze the deamination of nucleosides. The zinc ion in the active site plays a central role in the proposed catalytic mechanism, activating a water molecule to form a hydroxide ion that performs a nucleophilic attack on the substrate. The functional enzyme is a homodimer. Cytosine deamin…
NODE_1_length_166950_cov_353.718	gene_91	70453	71034	-	cd01286	7	165	2e-54	170	0.97	Deoxycytidylate deaminase domain. Deoxycytidylate deaminase catalyzes the deamination of dCMP to dUMP, providing the nucleotide substrate for thymidylate synthase. The enzyme binds Zn++, which is required for catalytic activity. The activity of the enzyme is allosterically regulated by the ratio of dCTP to dTTP not only in eukaryotic cells but also in T-even phage-infected Escherichia coli, with …
NODE_1_length_166950_cov_353.718	gene_98	72854	73759	-	COG0241	156	224	6e-05	40	0.37	Histidinol phosphatase or a related phosphatase [Amino acid transport and metabolism].
NODE_1_length_166950_cov_353.718	gene_98	72854	73759	-	COG0563	3	130	6e-07	45.7	0.7	Adenylate kinase or related kinase [Nucleotide transport and metabolism].
NODE_1_length_166950_cov_353.718	gene_98	72854	73759	-	COG0645	3	123	2e-06	43.9	0.7	Predicted kinase [General function prediction only].
NODE_1_length_166950_cov_353.718	gene_98	72854	73759	-	COG4088	2	145	6e-05	40.6	0.52	tRNA Uridine 5-carbamoylmethylation protein Kti12 (Killer toxin insensitivity protein) [Translation, ribosomal structure and biogenesis].
NODE_1_length_166950_cov_353.718	gene_98	72854	73759	-	COG4639	2	150	2e-15	69.8	0.83	Predicted kinase [General function prediction only].
NODE_1_length_166950_cov_353.718	gene_98	72854	73759	-	PF13671.5	6	146	1.5e-20	73.8	0.965035	AAA domain
NODE_1_length_166950_cov_353.718	gene_98	72854	73759	-	cd01427	161	296	6e-07	45.5	1	Haloacid dehalogenase-like hydrolases. The haloacid dehalogenase-like (HAD) superfamily includes L-2-haloacid dehalogenase, epoxide hydrolase, phosphoserine phosphatase, phosphomannomutase, phosphoglycolate phosphatase, P-type ATPase, and many others. This superfamily includes a variety of enzymes that catalyze the cleavage of substrate C-Cl, P-C, and P-OP bonds via nucleophilic substitution path…
NODE_1_length_166950_cov_353.718	gene_98	72854	73759	-	cd07502	159	301	1e-65	204	0.94	C-terminal phosphatase domain of T4 polynucleotide kinase/phosphatase (PNKP) and related phosphatases. This family includes the C-terminal domain of the bifunctional enzyme T4 polynucleotide kinase/phosphatase, PNKP. The PNKP phosphatase domain can catalyze the hydrolytic removal of the 3'-phosphoryl of DNA, RNA and deoxynucleoside 3'-monophosphates. This family belongs to the haloacid dehalogena…
NODE_1_length_166950_cov_353.718	gene_103	74940	75443	-	PF17527.1	1	166	2.7e-95	316.6	0.994012	Phage ALP protein
NODE_1_length_166950_cov_353.718	gene_104	75508	76632	-	PF09511.9	52	246	4.3e-24	85.5	1	RNA ligase
NODE_1_length_166950_cov_353.718	gene_104	75508	76632	-	TIGR02308	2	374	6.7e-191	632.2	1	RNA_lig_T4_1: RNA ligase, T4 RnlA family
NODE_1_length_166950_cov_353.718	gene_105	76685	77095	-	PF01541.23	34	112	4.1e-06	26.9	0.769231	GIY-YIG catalytic domain
NODE_1_length_166950_cov_353.718	gene_105	76685	77095	-	cd00719	36	125	6e-06	39.3	0.98	GIY-YIG nuclease domain superfamily. The GIY-YIG nuclease domain superfamily includes a large and diverse group of proteins involved in many cellular processes, such as class I homing GIY-YIG family endonucleases, prokaryotic nucleotide excision repair proteins UvrC and Cho, type II restriction enzymes, the endonuclease/reverse transcriptase of eukaryotic retrotransposable elements, and a family …
NODE_1_length_166950_cov_353.718	gene_105	76685	77095	-	cd10434	42	71	0.0001	36.3	0.38	Catalytic GIY-YIG domain of nucleotide excision repair endonucleases UvrC, Cho, and similar proteins. UvrC is essential for nucleotide excision repair (NER). The N-terminal catalytic GIY-YIG domain of UvrC (also known as Uri domain) is responsible for the 3' incision reaction and the C-terminal half of UvrC, consisting of an UvrB-binding domain (UvrBb), EndoV-like nuclease domain and a helix-hair…
NODE_1_length_166950_cov_353.718	gene_105	76685	77095	-	cd10436	34	132	3e-30	105	0.99	Catalytic GIY-YIG domain of coliphage T4 non-specific endonuclease II, type II restriction endonuclease R.Hpy188I, and similar proteins. This family includes two different GIY-YIG enzymes, coliphage T4 non-specific endonuclease II (EndoII), and type II restriction endonuclease R.Hpy188I. They display high sequence similarity to each other, and both of them contain an extra N-terminal hairpin that…
NODE_1_length_166950_cov_353.718	gene_105	76685	77095	-	smart00465	33	135	5e-09	44.7	0.98	GIY-YIG type nucleases (URI domain).
NODE_1_length_166950_cov_353.718	gene_106	77123	78301	-	COG0208	1	382	1e-72	231	0.98	Ribonucleotide reductase beta subunit, ferritin-like domain [Nucleotide transport and metabolism].
NODE_1_length_166950_cov_353.718	gene_106	77123	78301	-	NF006576.0	3	388	4.7e-145	482.4	0.986702	PRK09101.1: ribonucleotide-diphosphate reductase subunit beta
NODE_1_length_166950_cov_353.718	gene_106	77123	78301	-	PF00268.20	33	335	3.4e-34	118.5	0.938849	Ribonucleotide reductase, small chain
NODE_1_length_166950_cov_353.718	gene_106	77123	78301	-	PRK07209	48	352	1e-09	57.3	0.72	ribonucleotide-diphosphate reductase subunit beta; Validated
NODE_1_length_166950_cov_353.718	gene_106	77123	78301	-	PRK09101	3	382	2e-180	509	0.97	ribonucleotide-diphosphate reductase subunit beta; Reviewed
NODE_1_length_166950_cov_353.718	gene_106	77123	78301	-	PRK09614	16	383	1e-24	101	0.97	ribonucleotide-diphosphate reductase subunit beta; Reviewed
NODE_1_length_166950_cov_353.718	gene_106	77123	78301	-	PRK13965	47	161	2e-06	47.1	0.34	ribonucleotide-diphosphate reductase subunit beta; Provisional
NODE_1_length_166950_cov_353.718	gene_106	77123	78301	-	PRK13967	29	161	8e-06	45.1	0.41	ribonucleotide-diphosphate reductase subunit beta; Provisional
NODE_1_length_166950_cov_353.718	gene_106	77123	78301	-	cd01049	28	355	2e-68	219	0.99	Ribonucleotide Reductase, R2/beta subunit, ferritin-like diiron-binding domain. Ribonucleotide Reductase, R2/beta subunit (RNRR2) is a member of a broad superfamily of ferritin-like diiron-carboxylate proteins. The RNR protein catalyzes the conversion of ribonucleotides to deoxyribonucleotides and is found in all eukaryotes, many prokaryotes, several viruses, and few archaea. The catalytically ac…
NODE_1_length_166950_cov_353.718	gene_107	78353	80617	-	COG0209	47	753	0	555	0.98	Ribonucleotide reductase alpha subunit [Nucleotide transport and metabolism].
NODE_1_length_166950_cov_353.718	gene_107	78353	80617	-	NF006578.0	3	752	8.8e-300	995.4	0.99343	PRK09103.1: ribonucleoside-diphosphate reductase subunit alpha
NODE_1_length_166950_cov_353.718	gene_107	78353	80617	-	PF02867.14	220	663	2.4e-114	382.7	0.837786	Ribonucleotide reductase, barrel domain
NODE_1_length_166950_cov_353.718	gene_107	78353	80617	-	PRK06406	185	671	6e-27	114	0.54	ribonucleotide-diphosphate reductase subunit alpha; Validated
NODE_1_length_166950_cov_353.718	gene_107	78353	80617	-	PRK06539	4	727	2e-83	282	0.86	ribonucleotide-diphosphate reductase subunit alpha; Validated
NODE_1_length_166950_cov_353.718	gene_107	78353	80617	-	PRK06948	391	634	5e-13	70.2	0.38	ribonucleotide reductase-like protein; Provisional
NODE_1_length_166950_cov_353.718	gene_107	78353	80617	-	PRK07088	19	751	2e-101	330	0.92	ribonucleotide-diphosphate reductase subunit alpha; Validated
NODE_1_length_166950_cov_353.718	gene_107	78353	80617	-	PRK07187	86	754	3e-47	176	0.9	ribonucleotide-diphosphate reductase subunit alpha; Validated
NODE_1_length_166950_cov_353.718	gene_107	78353	80617	-	PRK07207	4	651	1e-64	231	0.64	ribonucleotide-diphosphate reductase subunit alpha; Validated
NODE_1_length_166950_cov_353.718	gene_107	78353	80617	-	PRK07306	99	631	5e-29	121	0.72	ribonucleotide-diphosphate reductase subunit alpha; Validated
NODE_1_length_166950_cov_353.718	gene_107	78353	80617	-	PRK07632	99	631	1e-38	151	0.74	ribonucleotide-diphosphate reductase subunit alpha; Validated
NODE_1_length_166950_cov_353.718	gene_107	78353	80617	-	PRK08115	175	631	8e-19	89.1	0.51	ribonucleotide-diphosphate reductase subunit alpha; Validated
NODE_1_length_166950_cov_353.718	gene_107	78353	80617	-	PRK08188	104	754	3e-37	147	0.84	ribonucleotide-diphosphate reductase subunit alpha; Validated
NODE_1_length_166950_cov_353.718	gene_107	78353	80617	-	PRK08332	467	654	3e-18	87.9	0.11	ribonucleotide-diphosphate reductase subunit alpha; Validated
NODE_1_length_166950_cov_353.718	gene_107	78353	80617	-	PRK08447	3	727	4e-96	317	0.89	ribonucleotide-diphosphate reductase subunit alpha; Validated
NODE_1_length_166950_cov_353.718	gene_107	78353	80617	-	PRK08665	134	631	4e-26	111	0.55	ribonucleotide-diphosphate reductase subunit alpha; Validated
NODE_1_length_166950_cov_353.718	gene_107	78353	80617	-	PRK09102	132	752	2e-54	196	0.88	ribonucleotide-diphosphate reductase subunit alpha; Validated
NODE_1_length_166950_cov_353.718	gene_107	78353	80617	-	PRK09103	4	754	0	1062	0.99	ribonucleotide-diphosphate reductase subunit alpha; Validated
NODE_1_length_166950_cov_353.718	gene_107	78353	80617	-	PRK09209	4	752	1e-93	309	0.94	ribonucleotide-diphosphate reductase subunit alpha; Validated
NODE_1_length_166950_cov_353.718	gene_107	78353	80617	-	PRK12364	12	752	2e-88	297	0.83	ribonucleotide-diphosphate reductase subunit alpha; Provisional
NODE_1_length_166950_cov_353.718	gene_107	78353	80617	-	PRK12365	2	653	8e-72	252	0.61	ribonucleotide-diphosphate reductase subunit alpha; Provisional
NODE_1_length_166950_cov_353.718	gene_107	78353	80617	-	TIGR02506	143	731	2.4e-160	532.9	1	NrdE_NrdA: ribonucleoside-diphosphate reductase, alpha subunit
NODE_1_length_166950_cov_353.718	gene_107	78353	80617	-	cd00576	192	728	1e-32	129	0.93	Ribonucleotide reductase and Pyruvate formate lyase. Ribonucleotide reductase (RNR) and pyruvate formate lyase (PFL) are believed to have diverged from a common ancestor. They have a structurally similar ten-stranded alpha-beta barrel domain that hosts the active site, and are radical enzymes. RNRs are found in all organisms and provide the only mechanism by which nucleotides are converted to deo…
NODE_1_length_166950_cov_353.718	gene_107	78353	80617	-	cd01679	167	730	6e-141	424	0.99	Class I ribonucleotide reductase. Ribonucleotide reductase (RNR) catalyzes the reductive synthesis of deoxyribonucleotides from their corresponding ribonucleotides. It provides the precursors necessary for DNA synthesis. RNRs are separated into three classes based on their metallocofactor usage. Class I RNRs, found in eukaryotes, bacteria, and many viruses, use a diiron-tyrosyl radical. Class II …
NODE_1_length_166950_cov_353.718	gene_107	78353	80617	-	cd02888	192	637	5e-49	178	0.86	Class II ribonucleotide reductase, dimeric form. Ribonucleotide reductase (RNR) catalyzes the reductive synthesis of deoxyribonucleotides from their corresponding ribonucleotides. It provides the precursors necessary for DNA synthesis. RNRs are separated into three classes based on their metallocofactor usage. Class I RNRs, found in eukaryotes, bacteria, and bacteriophage, use a diiron-tyrosyl ra…
NODE_1_length_166950_cov_353.718	gene_109	81148	82008	-	COG0207	1	286	9e-108	315	0.97	Thymidylate synthase [Nucleotide transport and metabolism].
NODE_1_length_166950_cov_353.718	gene_109	81148	82008	-	PF00303.18	2	286	5.5e-98	327.3	1	Thymidylate synthase
NODE_1_length_166950_cov_353.718	gene_109	81148	82008	-	PRK00956	109	231	9e-14	66.5	0.6	thymidylate synthase; Provisional
NODE_1_length_166950_cov_353.718	gene_109	81148	82008	-	PRK01827	1	286	8e-125	359	0.99	thymidylate synthase; Reviewed
NODE_1_length_166950_cov_353.718	gene_109	81148	82008	-	PRK13821	1	286	6e-70	220	0.85	thymidylate synthase; Provisional
NODE_1_length_166950_cov_353.718	gene_109	81148	82008	-	TIGR03284	2	286	9.3e-88	292.2	1	thym_sym: thymidylate synthase
NODE_1_length_166950_cov_353.718	gene_109	81148	82008	-	cd00351	3	227	1e-93	277	0.98	Thymidylate synthase and pyrimidine hydroxymethylase: Thymidylate synthase (TS) and deoxycytidylate hydroxymethylase (dCMP-HMase) are homologs that catalyze analogous alkylation of C5 of pyrimidine nucleotides. Both enzymes are involved in the biosynthesis of DNA precursors and are active as homodimers. However, they exhibit distinct pyrimidine base specificities and differ in the details of thei…
NODE_1_length_166950_cov_353.718	gene_111	82422	83006	-	COG0262	1	149	1e-12	60.4	0.72	Dihydrofolate reductase [Coenzyme transport and metabolism].
NODE_1_length_166950_cov_353.718	gene_111	82422	83006	-	PF00186.18	22	158	5e-17	62	0.708075	Dihydrofolate reductase
NODE_1_length_166950_cov_353.718	gene_111	82422	83006	-	PRK10769	23	149	4e-06	42.8	0.64	dihydrofolate reductase; Provisional
NODE_1_length_166950_cov_353.718	gene_111	82422	83006	-	cd00209	2	194	3e-18	76.8	0.95	Dihydrofolate reductase (DHFR). Reduces 7,8-dihydrofolate to 5,6,7,8-tetrahydrofolate with NADPH as a cofactor. This is an essential step in the biosynthesis of deoxythymidine phosphate since 5,6,7,8-tetrahydrofolate is required to regenerate 5,10-methylenetetrahydrofolate which is then utilized by thymidylate synthase. Inhibition of DHFR interrupts thymidilate synthesis and DNA replication, inhi…
NODE_1_length_166950_cov_353.718	gene_115	84053	84280	-	PF05798.10	1	75	1.7e-55	185.1	1	Bacteriophage FRD3 protein
NODE_1_length_166950_cov_353.718	gene_116	84425	85330	-	PF08804.9	28	116	8.6e-52	173.2	1	gp32 DNA binding protein like
NODE_1_length_166950_cov_353.718	gene_117	85390	85851	-	cd10444	1	40	5e-05	37.8	0.46	N-terminal catalytic GIY-YIG domain of bacteriophage T4 segABCDEFG gene encoding proteins. The prototypes of Seg family are proteins SegA, B, C, D, E, F, and G encoded by five seg genes segA, B, C, D, E, F, and G in the bacteriophage T4 genome, respectively. SegA, B, C, D, E, F, and G are not encoded by introns, but free-standing homologs of the GIY-YIG family of endonucleases encoded by group I …
NODE_1_length_166950_cov_353.718	gene_118	86024	86662	-	PF08994.9	108	211	8.2e-55	183.7	1	T4 gene Gp59 loader of gp41 DNA helicase C-term
NODE_1_length_166950_cov_353.718	gene_119	86674	87012	-	PF16805.4	38	108	5.5e-28	96.8	0.985507	Phage late-transcription coactivator
NODE_1_length_166950_cov_353.718	gene_120	86990	87259	-	PF11126.7	22	88	3.7e-41	139.1	1	Transcriptional regulator DsbA
NODE_1_length_166950_cov_353.718	gene_121	87268	88185	-	COG0258	63	206	3e-06	45	0.43	5'-3' exonuclease [Replication, recombination and repair].
NODE_1_length_166950_cov_353.718	gene_121	87268	88185	-	PF09293.9	183	305	8.3e-70	232.8	1	T4 RNase H, C terminal
NODE_1_length_166950_cov_353.718	gene_121	87268	88185	-	PRK05755	113	240	4e-09	55.5	0.14	DNA polymerase I; Provisional
NODE_1_length_166950_cov_353.718	gene_121	87268	88185	-	PRK09482	71	180	2e-08	51.8	0.36	flap endonuclease-like protein; Provisional
NODE_1_length_166950_cov_353.718	gene_121	87268	88185	-	cd00008	15	180	5e-75	229	1	PIN domains of the 5'-3' exonucleases of DNA polymerase I, bacteriophage T4 RNase H and T5-5' nucleases, and homologs. PIN (PilT N terminus) domains of the 5'-3' exonucleases (53EXO) of mutli-domain DNA polymerase I and single domain protein homologs, as well as, the PIN domains of bacteriophage T5-5'nuclease (T5FEN or 5'-3'exonuclease), bacteriophage T4 RNase H (T4FEN), bacteriophage T3 (T3 phag…
NODE_1_length_166950_cov_353.718	gene_121	87268	88185	-	cd09852	43	171	1e-11	59.1	0.93	PIN (PilT N terminus) domain: Superfamily. PIN_SF The PIN (PilT N terminus) domain belongs to a large nuclease superfamily with representatives from eukaryota, eubacteria, and archaea. PIN domains were originally named for their sequence similarity to the N-terminal domain of an annotated pili biogenesis protein, PilT, a domain fusion between a PIN-domain and a PilT ATPase domain. The structural …
NODE_1_length_166950_cov_353.718	gene_121	87268	88185	-	cd09853	15	179	1e-66	207	0.98	PIN domains of structure-specific 5' nucleases (or flap endonuclease-1-like) involved in DNA replication, repair, and recombination. Structure-specific 5' nucleases are capable of both 5'-3' exonucleolytic activity and cleaving bifurcated or branched DNA, in an endonucleolytic, structure-specific manner. The family includes the PIN (PilT N terminus) domains of Flap Endonuclease-1 (FEN1), Exonucle…
NODE_1_length_166950_cov_353.718	gene_121	87268	88185	-	cd09859	59	176	6e-11	58.2	0.57	PIN domain of the 5'-3' exonuclease of Taq DNA polymerase I and homologs. The 5'-3' exonuclease (53EXO) PIN (PilT N terminus) domain of multi-domain DNA polymerase I and single domain protein homologs are included in this family. Taq contains a polymerase domain for synthesizing a new DNA strand and a 53EXO PIN domain for cleaving RNA primers or damaged DNA strands. Taq's 53EXO PIN domain recogni…
NODE_1_length_166950_cov_353.718	gene_121	87268	88185	-	cd09860	14	181	1e-68	212	0.95	PIN domain of bacteriophage T3, T4 RNase H, T5-5'nuclease, and homologs. PIN (PilT N terminus) domain of bacteriophage T5-5'nuclease (5'-3' exonuclease or T5FEN), bacteriophage T4 RNase H (T4FEN), bacteriophage T3 (T3 phage exodeoxyribonuclease) and other similar 5' nucleases are included in this family. T5-5'nuclease is a 5'-3'exodeoxyribonuclease that also exhibits endonucleolytic activity on f…
NODE_1_length_166950_cov_353.718	gene_121	87268	88185	-	cd09899	184	259	5e-12	59.4	0.84	H3TH domain of bacteriophage T3, T4 RNase H, T5-5' nucleases, and homologs. H3TH (helix-3-turn-helix) domains of bacteriophage T5-5'nuclease (5'-3' exonuclease or T5FEN), bacteriophage T4 RNase H (T4FEN), bacteriophage T3 (T3 phage exodeoxyribonuclease) and other similar 5' nucleases are included in this family. The T5-5'nuclease is a 5'-3' exodeoxyribonuclease that also exhibits endonucleolytic …
NODE_1_length_166950_cov_353.718	gene_121	87268	88185	-	smart00279	185	220	7e-08	43.6	1	Helix-hairpin-helix class 2 (Pol1 family) motifs.
NODE_1_length_166950_cov_353.718	gene_121	87268	88185	-	smart00475	58	206	2e-14	66.1	0.5	5'-3' exonuclease.
NODE_1_length_166950_cov_353.718	gene_123	92168	93283	+	PF15711.4	58	113	1.2e-07	32	0.617978	Interleukin-like EMT inducer
NODE_1_length_166950_cov_353.718	gene_124	93346	93996	+	PF03903.12	1	216	5.1e-87	291	1	Phage T4 tail fibre
NODE_1_length_166950_cov_353.718	gene_125	94005	96971	+	PF13884.5	876	932	4.7e-09	36.3	1	Chaperone of endosialidase
NODE_1_length_166950_cov_353.718	gene_126	97004	97804	+	PF05268.10	1	266	4e-123	410.1	1	Phage tail fibre adhesin Gp38
NODE_1_length_166950_cov_353.718	gene_128	98493	98765	-	PF09010.9	2	81	2.2e-42	142.9	1	Anti-Sigma Factor A
NODE_1_length_166950_cov_353.718	gene_138	101838	103166	-	COG0188	3	382	3e-55	194	0.45	DNA gyrase/topoisomerase IV, subunit A [Replication, recombination and repair].
NODE_1_length_166950_cov_353.718	gene_138	101838	103166	-	PF00521.19	27	429	4e-78	263.1	0.971831	DNA gyrase/topoisomerase IV, subunit A
NODE_1_length_166950_cov_353.718	gene_138	101838	103166	-	PRK05560	17	236	3e-21	94.7	0.25	DNA gyrase subunit A; Validated
NODE_1_length_166950_cov_353.718	gene_138	101838	103166	-	PRK05561	5	236	1e-33	132	0.29	DNA topoisomerase IV subunit A; Validated
NODE_1_length_166950_cov_353.718	gene_138	101838	103166	-	PRK09630	6	247	6e-23	98.8	0.48	DNA topoisomerase IV subunit A; Provisional
NODE_1_length_166950_cov_353.718	gene_138	101838	103166	-	PRK09631	7	247	9e-31	122	0.36	DNA topoisomerase IV subunit A; Provisional
NODE_1_length_166950_cov_353.718	gene_138	101838	103166	-	PRK12758	17	257	2e-21	95.5	0.26	DNA topoisomerase IV subunit A; Provisional
NODE_1_length_166950_cov_353.718	gene_138	101838	103166	-	PRK13979	17	195	1e-21	95.6	0.18	DNA topoisomerase IV subunit A; Provisional
NODE_1_length_166950_cov_353.718	gene_138	101838	103166	-	cd00187	27	405	8e-66	218	0.8	DNA Topoisomerase, subtype IIA; domain A'; bacterial DNA topoisomerase IV (C subunit, ParC), bacterial DNA gyrases (A subunit, GyrA),mammalian DNA toposiomerases II. DNA topoisomerases are essential enzymes that regulate the conformational changes in DNA topology by catalysing the concerted breakage and rejoining of DNA strands during normal cellular growth.
NODE_1_length_166950_cov_353.718	gene_138	101838	103166	-	smart00434	6	442	2e-142	413	0.98	DNA Topoisomerase IV. Bacterial DNA topoisomerase IV, GyrA, ParC
NODE_1_length_166950_cov_353.718	gene_139	103550	104008	-	PF06591.10	1	152	5.7e-96	318.3	1	T4-like phage nuclear disruption protein (Ndd)
NODE_1_length_166950_cov_353.718	gene_150	109562	111379	-	COG0187	6	603	2e-94	303	0.87	DNA gyrase/topoisomerase IV, subunit B [Replication, recombination and repair].
NODE_1_length_166950_cov_353.718	gene_150	109562	111379	-	PF02518.25	46	188	7.5e-14	52.1	0.945946	Histidine kinase-, DNA gyrase B-, and HSP90-like ATPase
NODE_1_length_166950_cov_353.718	gene_150	109562	111379	-	PRK05559	6	603	7e-79	262	0.85	DNA topoisomerase IV subunit B; Reviewed
NODE_1_length_166950_cov_353.718	gene_150	109562	111379	-	PRK05644	4	601	1e-53	193	0.8	DNA gyrase subunit B; Validated
NODE_1_length_166950_cov_353.718	gene_150	109562	111379	-	PRK14939	6	532	1e-39	152	0.6	DNA gyrase subunit B; Provisional
NODE_1_length_166950_cov_353.718	gene_150	109562	111379	-	cd00075	48	185	2e-07	48.4	0.95	Histidine kinase-like ATPases; This family includes several ATP-binding proteins for example: histidine kinase, DNA gyrase B, topoisomerases, heat shock protein HSP90, phytochrome-like ATPases and DNA mismatch repair proteins
NODE_1_length_166950_cov_353.718	gene_150	109562	111379	-	cd00822	265	374	3e-10	57.6	0.59	TopoIIA_Trans_DNA_gyrase: Transducer domain, having a ribosomal S5 domain 2-like fold, of the type found in proteins of the type IIA family of DNA topoisomerases similar to the B subunits of E. coli DNA gyrase and E. coli Topoisomerase IV which are heterodimers composed of two subunits. The type IIA enzymes are the predominant form of topoisomerase and are found in some bacteriophages, viruses an…
NODE_1_length_166950_cov_353.718	gene_150	109562	111379	-	cd01030	409	515	6e-30	113	0.93	TOPRIM_TopoIIA_like: topoisomerase-primase (TOPRIM) nucleotidyl transferase/hydrolase domain of the type found in proteins of the type IIA family of DNA topoisomerases similar to Saccharomyces cerevisiae Topoisomerase II. TopoIIA enzymes cut both strands of the duplex DNA to remove (relax) both positive and negative supercoils in DNA. These enzymes covalently attach to the 5' ends of the cut DNA,…
NODE_1_length_166950_cov_353.718	gene_150	109562	111379	-	cd03365	410	510	9e-19	82	0.84	TOPRIM_TopoIIA: topoisomerase-primase (TOPRIM) nucleotidyl transferase/hydrolase domain of the type found in proteins of the type IIA family of DNA topoisomerases similar to Saccharomyces cerevisiae Topoisomerase II. TopoIIA enzymes cut both strands of the duplex DNA to remove (relax) both positive and negative supercoils in DNA. These enzymes covalently attach to the 5' ends of the cut DNA, sepa…
NODE_1_length_166950_cov_353.718	gene_150	109562	111379	-	cd03366	411	521	1e-18	81.5	0.96	TOPRIM_TopoIIA_GyrB: topoisomerase-primase (TOPRIM) nucleotidyl transferase/hydrolase domain of the type found in proteins of the type IIA family of DNA topoisomerases similar to the Escherichia coli GyrB subunit. TopoIIA enzymes cut both strands of the duplex DNA to remove (relax) both positive and negative supercoils in DNA. These enzymes covalently attach to the 5' ends of the cut DNA, separat…
NODE_1_length_166950_cov_353.718	gene_150	109562	111379	-	cd03481	230	339	2e-20	88.1	0.72	TopoIIA_Trans_ScTopoIIA: Transducer domain, having a ribosomal S5 domain 2-like fold, of the type found in proteins of the type IIA family of DNA topoisomerases similar to Saccharomyces cerevisiae Topo IIA. S. cerevisiae Topo IIA is a homodimer encoded by a single gene. The type IIA enzymes are the predominant form of topoisomerase and are found in some bacteriophages, viruses and archaea, and in…
NODE_1_length_166950_cov_353.718	gene_150	109562	111379	-	smart00387	47	189	2e-08	47.3	0.9	Histidine kinase-like ATPases. Histidine kinase-, DNA gyrase B-, phytochrome-like ATPases.
NODE_1_length_166950_cov_353.718	gene_150	109562	111379	-	smart00433	47	605	8e-101	316	0.91	TopoisomeraseII. Eukaryotic DNA topoisomerase II, GyrB, ParE
NODE_1_length_166950_cov_353.718	gene_153	112089	112265	-	COG2331	1	53	2e-05	35.6	0.63	Predicted nucleic acid-binding protein, contains Zn-ribbon domain [General function prediction only].
NODE_1_length_166950_cov_353.718	gene_153	112089	112265	-	PF09723.9	1	38	9.9e-12	44.7	0.875	Zinc ribbon domain
NODE_1_length_166950_cov_353.718	gene_153	112089	112265	-	TIGR02605	1	45	8.6e-12	42.9	0.846154	CxxC_CxxC_SSSS: putative regulatory protein, FmdB family
NODE_1_length_166950_cov_353.718	gene_153	112089	112265	-	smart00834	1	43	2e-12	51.4	1	Putative regulatory protein. CxxC_CXXC_SSSS represents a region of about 41 amino acids found in a number of small proteins in a wide range of bacteria. The region usually begins with the initiator Met and contains two CxxC motifs separated by 17 amino acids. One protein in this entry has been noted as a putative regulatory protein, designated FmdB. Most proteins in this entry have a C-terminal r…
NODE_1_length_166950_cov_353.718	gene_159	114675	115358	-	PF16473.4	4	164	1.1e-19	70.9	0.76506	3' exoribonuclease, RNase T-like
NODE_1_length_166950_cov_353.718	gene_159	114675	115358	-	cd06127	5	192	2e-05	41.5	0.92	DEDDh 3'-5' exonuclease domain family. DEDDh exonucleases, part of the DnaQ-like (or DEDD) exonuclease superfamily, catalyze the excision of nucleoside monophosphates at the DNA or RNA termini in the 3'-5' direction. These proteins contain four invariant acidic residues in three conserved sequence motifs termed ExoI, ExoII and ExoIII. DEDDh exonucleases are classified as such because of the prese…
NODE_1_length_166950_cov_353.718	gene_163	116092	117411	-	COG0507	32	436	4e-19	87.2	0.46	ATP-dependent exoDNAse (exonuclease V), alpha subunit, helicase superfamily I [Replication, recombination and repair].
NODE_1_length_166950_cov_353.718	gene_163	116092	117411	-	PF13604.5	6	194	8e-26	90.8	0.895833	AAA domain
NODE_1_length_166950_cov_353.718	gene_163	116092	117411	-	PRK10875	30	153	3e-08	53.4	0.18	exonuclease V subunit alpha; Provisional
NODE_1_length_166950_cov_353.718	gene_163	116092	117411	-	PRK13709	5	153	3e-06	47.5	0.08	conjugal transfer nickase/helicase TraI; Provisional
NODE_1_length_166950_cov_353.718	gene_163	116092	117411	-	smart00382	24	129	2e-07	43.9	0.67	ATPases associated with a variety of cellular activities. AAA - ATPases associated with a variety of cellular activities. This profile/alignment only detects a fraction of this vast family. The poorly conserved N-terminal helix is missing from the alignment.
NODE_1_length_166950_cov_353.718	gene_163	116092	117411	-	smart00487	1	140	4e-07	44.4	0.68	DEAD-like helicases superfamily.
NODE_1_length_166950_cov_353.718	gene_178	122693	123211	-	cd11527	35	172	4e-08	46.4	1	Nucleoside Triphosphate Pyrophosphohydrolase (EC 3.6.1.8) MazG-like domain found in dimeric 2-Deoxyuridine 5'-triphosphate nucleotidohydrolase and similar proteins. dUTPase (dUTP pyrophosphatase; EC 3.6.1.23) catalyzes the hydrolysis of dUTP to dUMP and pyrophosphate. It acts to ensure chromosomal integrity by reducing the effective ratio of dUTP/dTTP. Members in this family are dimeric dUTPases,…
NODE_1_length_166950_cov_353.718	gene_180	123480	124508	-	COG0358	64	314	1e-06	47.1	0.41	DNA primase (bacterial type) [Replication, recombination and repair].
NODE_1_length_166950_cov_353.718	gene_180	123480	124508	-	PF08275.10	177	209	0.00011	22.1	0.257812	DNA primase catalytic core, N-terminal domain
NODE_1_length_166950_cov_353.718	gene_181	124511	124675	-	PF07068.10	3	40	3.4e-05	22.7	0.0746562	Major capsid protein Gp23
NODE_1_length_166950_cov_353.718	gene_186	125900	127327	-	COG0305	53	382	1e-11	63.4	0.72	Replicative DNA helicase [Replication, recombination and repair].
NODE_1_length_166950_cov_353.718	gene_186	125900	127327	-	PF03796.14	174	409	1e-16	61	0.917647	DnaB-like helicase C terminal domain
NODE_1_length_166950_cov_353.718	gene_186	125900	127327	-	PRK06749	179	403	8e-05	42.6	0.5	replicative DNA helicase; Provisional
NODE_1_length_166950_cov_353.718	gene_186	125900	127327	-	cd00984	179	382	3e-11	61	0.79	DnaB helicase C terminal domain. The hexameric helicase DnaB unwinds the DNA duplex at the chromosome replication fork. Although the mechanism by which DnaB both couples ATP hydrolysis to translocation along DNA and denatures the duplex is unknown, a change in the quaternary structure of the protein involving dimerization of the N-terminal domain has been observed and may occur during the enzymat…
NODE_1_length_166950_cov_353.718	gene_186	125900	127327	-	cd01122	170	408	5e-08	52	0.84	GP4d_helicase is a homohexameric 5'-3' helicases. Helicases couple NTP hydrolysis to the unwinding of nucleic acid duplexes into their component strands.
NODE_1_length_166950_cov_353.718	gene_187	127337	127675	-	PF11113.7	42	97	2.7e-26	91.3	1	Head assembly gene product
NODE_1_length_166950_cov_353.718	gene_188	127668	128849	-	COG0468	11	282	1e-12	64.6	0.91	RecA/RadA recombinase [Replication, recombination and repair].
NODE_1_length_166950_cov_353.718	gene_188	127668	128849	-	PF00154.20	42	268	2.1e-11	43.7	0.855513	recA bacterial DNA recombination protein
NODE_1_length_166950_cov_353.718	gene_188	127668	128849	-	PRK09519	38	273	1e-09	57.4	0.28	DNA recombination protein RecA; Reviewed
NODE_1_length_166950_cov_353.718	gene_188	127668	128849	-	cd00983	87	292	7e-12	63.8	0.6	RecA is a bacterial enzyme which has roles in homologous recombination, DNA repair, and the induction of the SOS response. RecA couples ATP hydrolysis to DNA strand exchange.
NODE_1_length_166950_cov_353.718	gene_188	127668	128849	-	cd01393	43	232	4e-06	45.3	0.81	RecA is a bacterial enzyme which has roles in homologous recombination, DNA repair, and the induction of the SOS response. RecA couples ATP hydrolysis to DNA strand exchange. While prokaryotes have a single RecA protein, eukaryotes have multiple RecA homologs such as Rad51, DMC1 and Rad55/57. Archaea have the RecA-like homologs radA and radB.
NODE_1_length_166950_cov_353.718	gene_190	129766	130506	-	COG0207	27	222	2e-09	54.2	0.68	Thymidylate synthase [Nucleotide transport and metabolism].
NODE_1_length_166950_cov_353.718	gene_190	129766	130506	-	PF00303.18	25	226	4.2e-16	58.8	0.761194	Thymidylate synthase
NODE_1_length_166950_cov_353.718	gene_190	129766	130506	-	PRK00956	108	222	9e-05	40.4	0.48	thymidylate synthase; Provisional
NODE_1_length_166950_cov_353.718	gene_190	129766	130506	-	cd00351	27	222	7e-18	77.7	0.84	Thymidylate synthase and pyrimidine hydroxymethylase: Thymidylate synthase (TS) and deoxycytidylate hydroxymethylase (dCMP-HMase) are homologs that catalyze analogous alkylation of C5 of pyrimidine nucleotides. Both enzymes are involved in the biosynthesis of DNA precursors and are active as homodimers. However, they exhibit distinct pyrimidine base specificities and differ in the details of thei…
NODE_1_length_166950_cov_353.718	gene_191	130660	130911	-	PF14373.5	22	63	1.3e-14	53.7	1	Superinfection immunity protein
NODE_1_length_166950_cov_353.718	gene_194	131731	134427	-	COG0417	188	768	7e-39	152	0.58	DNA polymerase elongation subunit (family B) [Replication, recombination and repair].
NODE_1_length_166950_cov_353.718	gene_194	131731	134427	-	PF00136.20	366	768	1.1e-27	96.8	0.700431	DNA polymerase family B
NODE_1_length_166950_cov_353.718	gene_194	131731	134427	-	PRK05761	174	428	5e-10	60.9	0.28	DNA polymerase I; Reviewed
NODE_1_length_166950_cov_353.718	gene_194	131731	134427	-	PRK05762	188	770	4e-38	151	0.59	DNA polymerase II; Reviewed
NODE_1_length_166950_cov_353.718	gene_194	131731	134427	-	cd00145	386	782	5e-54	189	0.89	DNA polymerase type-B family catalytic domain. DNA-directed DNA polymerases elongate DNA by adding nucleotide triphosphate (dNTP) residues to the 5'-end of the growing chain of DNA. DNA-directed DNA polymerases are multifunctional with both synthetic (polymerase) and degradative modes (exonucleases) and play roles in the processes of DNA replication, repair, and recombination. DNA-dependent DNA p…
NODE_1_length_166950_cov_353.718	gene_194	131731	134427	-	cd05160	108	332	8e-34	128	0.98	DEDDy 3'-5' exonuclease domain of family-B DNA polymerases. The 3'-5' exonuclease domain of family-B DNA polymerases. This domain has a fundamental role in reducing polymerase errors and is involved in proofreading activity. Family-B DNA polymerases contain an N-terminal DEDDy DnaQ-like exonuclease domain in the same polypeptide chain as the polymerase domain, similar to family-A DNA polymerases.…
NODE_1_length_166950_cov_353.718	gene_194	131731	134427	-	cd05530	386	428	6e-06	47.3	0.12	DNA polymerase type-B B1 subfamily catalytic domain. Archaeal proteins that are involved in DNA replication are similar to those from eukaryotes. Some archaeal members also possess multiple family B DNA polymerases (B1, B2 and B3). So far there is no specific function(s) has been assigned for different members of the archaea type B DNA polymerases. Phylogenetic analyses of eubacterial, archaeal, …
NODE_1_length_166950_cov_353.718	gene_194	131731	134427	-	cd05531	390	500	7e-06	46.6	0.27	DNA polymerase type-B B2 subfamily catalytic domain. Archaeal proteins that are involved in DNA replication are similar to those from eukaryotes. Some archaeal members also possess multiple family B DNA polymerases (B1, B2 and B3). So far there is no specific function(s) has been assigned for different members of the archaea type B DNA polymerases. Phylogenetic analyses of eubacterial, archaeal, …
NODE_1_length_166950_cov_353.718	gene_194	131731	134427	-	cd05532	385	667	4e-07	51	0.49	DNA polymerase type-B alpha subfamily catalytic domain. Three DNA-dependent DNA polymerases type B (alpha, delta, and epsilon) have been identified as essential for nuclear DNA replication in eukaryotes. DNA polymerase (Pol) alpha is almost exclusively required for the initiation of DNA replication and the priming of Okazaki fragments during elongation. In most organisms no specific repair role, …
NODE_1_length_166950_cov_353.718	gene_194	131731	134427	-	cd05536	385	758	4e-13	70	0.69	DNA polymerase type-B B3 subfamily catalytic domain. Archaeal proteins that are involved in DNA replication are similar to those from eukaryotes. Some members of the archaea also possess multiple family B DNA polymerases (B1, B2 and B3). So far there is no specific function(s) has been assigned for different members of the archaea type B DNA polymerases. Phylogenetic analyses of eubacterial, arch…
NODE_1_length_166950_cov_353.718	gene_194	131731	134427	-	cd05537	386	776	2e-15	76.9	0.72	DNA polymerase type-II subfamily catalytic domain. Bacteria contain five DNA polymerases (I, II, III, IV and V). DNA polymerase II (Pol II) is a prototype for the B-family of polymerases. The role of Pol II in a variety of cellular activities, such as repair of DNA damaged by UV irradiation or oxidation has been proven by genetic studies. DNA polymerase III is the main enzyme responsible for repl…
NODE_1_length_166950_cov_353.718	gene_194	131731	134427	-	cd05777	186	293	6e-13	67.2	0.43	DEDDy 3'-5' exonuclease domain of eukaryotic DNA polymerase delta, a family-B DNA polymerase. The 3'-5' exonuclease domain of eukaryotic DNA polymerase delta. DNA polymerase delta is a family-B DNA polymerase with a catalytic subunit that contains a DEDDy-type DnaQ-like 3'-5' exonuclease domain. It is one of the three DNA-dependent type B DNA polymerases (alpha and epsilon are the other two) that…
NODE_1_length_166950_cov_353.718	gene_194	131731	134427	-	cd05778	113	293	2e-05	44.5	0.71	inactive DEDDy 3'-5' exonuclease domain of eukaryotic DNA polymerase zeta, a family-B DNA polymerase. The 3'-5' exonuclease domain of eukaryotic DNA polymerase zeta. DNA polymerase zeta is a family-B DNA polymerase which is distantly related to DNA polymerase delta. It plays a major role in translesion replication and the production of either spontaneous or induced mutations. In addition, DNA pol…
NODE_1_length_166950_cov_353.718	gene_194	131731	134427	-	cd05783	107	326	1e-11	62.7	0.87	DEDDy 3'-5' exonuclease domain of Sulfolobus solfataricus DNA polymerase B1 and similar archaeal family-B DNA polymerases. The 3'-5' exonuclease domain of Sulfolobus solfataricus DNA polymerase B1 and similar archaeal proteins. B1 is a family-B DNA polymerase. Family-B DNA polymerases contain an N-terminal DEDDy DnaQ-like exonuclease domain in the same polypeptide chain as the polymerase domain, …
NODE_1_length_166950_cov_353.718	gene_194	131731	134427	-	cd05784	188	328	2e-11	61.8	0.69	DEDDy 3'-5' exonuclease domain of Escherichia coli DNA polymerase II and similar bacterial family-B DNA polymerases. The 3'-5' exonuclease domain of Escherichia coli DNA polymerase II (Pol II) and similar bacterial proteins. Pol II is a family-B DNA polymerase. Family-B DNA polymerases contain an N-terminal DEDDy DnaQ-like exonuclease domain in the same polypeptide chain as the polymerase domain,…
NODE_1_length_166950_cov_353.718	gene_194	131731	134427	-	cd05785	191	331	8e-09	54.3	0.68	Uncharacterized bacterial subgroup of the DEDDy 3'-5' exonuclease domain of family-B DNA polymerases. A subfamily of the 3'-5' exonuclease domain of family-B DNA polymerases. This subfamily is composed of uncharacterized bacterial family-B DNA polymerases. Family-B DNA polymerases contain an N-terminal DEDDy DnaQ-like exonuclease domain in the same polypeptide chain as the polymerase domain, simi…
NODE_1_length_166950_cov_353.718	gene_194	131731	134427	-	smart00486	107	627	7e-67	227	0.93	DNA polymerase type-B family. DNA polymerase alpha, delta, epsilon and zeta chain (eukaryota), DNA polymerases in archaea, DNA polymerase II in e. coli, mitochondrial DNA polymerases and and virus DNA polymerases
NODE_1_length_166950_cov_353.718	gene_196	134729	135097	-	PF01818.16	1	121	1.2e-75	251.2	1	Bacteriophage translational regulator
NODE_1_length_166950_cov_353.718	gene_197	135099	135662	-	PF16790.4	37	173	3.1e-81	270.5	1	Bacteriophage clamp loader A subunit
NODE_1_length_166950_cov_353.718	gene_198	135664	136623	-	COG0470	126	273	4e-09	53.5	0.62	DNA polymerase III, delta prime subunit [Replication, recombination and repair].
NODE_1_length_166950_cov_353.718	gene_198	135664	136623	-	COG1222	25	194	1e-05	43.4	0.39	ATP-dependent 26S proteasome regulatory subunit [Posttranslational modification, protein turnover, chaperones].
NODE_1_length_166950_cov_353.718	gene_198	135664	136623	-	COG2256	16	237	4e-13	66.5	0.49	Replication-associated recombination protein RarA (DNA-dependent ATPase) [Replication, recombination and repair].
NODE_1_length_166950_cov_353.718	gene_198	135664	136623	-	COG2812	11	259	2e-08	52.8	0.44	DNA polymerase III, gamma/tau subunits [Replication, recombination and repair].
NODE_1_length_166950_cov_353.718	gene_198	135664	136623	-	PF00004.28	47	156	5.1e-14	52.7	0.962121	ATPase family associated with various cellular activities (AAA)
NODE_1_length_166950_cov_353.718	gene_198	135664	136623	-	PRK00440	6	218	1e-32	122	0.64	replication factor C small subunit; Reviewed
NODE_1_length_166950_cov_353.718	gene_198	135664	136623	-	PRK04132	57	213	1e-12	66	0.18	replication factor C small subunit; Provisional
NODE_1_length_166950_cov_353.718	gene_198	135664	136623	-	PRK04195	14	286	3e-19	85.7	0.52	replication factor C large subunit; Provisional
NODE_1_length_166950_cov_353.718	gene_198	135664	136623	-	PRK07133	11	61	4e-06	46.3	0.08	DNA polymerase III subunits gamma and tau; Validated
NODE_1_length_166950_cov_353.718	gene_198	135664	136623	-	PRK12402	14	313	2e-23	96.6	0.86	replication factor C small subunit 2; Reviewed
NODE_1_length_166950_cov_353.718	gene_198	135664	136623	-	PRK13342	11	232	5e-12	64	0.5	recombination factor protein RarA; Reviewed
NODE_1_length_166950_cov_353.718	gene_198	135664	136623	-	PRK14953	13	249	4e-11	61.4	0.47	DNA polymerase III subunits gamma and tau; Provisional
NODE_1_length_166950_cov_353.718	gene_198	135664	136623	-	PRK14962	11	276	6e-10	57.5	0.54	DNA polymerase III subunits gamma and tau; Provisional
NODE_1_length_166950_cov_353.718	gene_198	135664	136623	-	cd00009	30	155	8e-11	57.5	0.83	The AAA+ (ATPases Associated with a wide variety of cellular Activities) superfamily represents an ancient group of ATPases belonging to the ASCE (for additional strand, catalytic E) division of the P-loop NTPase fold. The ASCE division also includes ABC, RecA-like, VirD4-like, PilT-like, and SF1/2 helicases. Members of the AAA+ ATPases function as molecular chaperons, ATPase subunits of protease…
NODE_1_length_166950_cov_353.718	gene_198	135664	136623	-	smart00382	44	161	3e-08	46.2	0.8	ATPases associated with a variety of cellular activities. AAA - ATPases associated with a variety of cellular activities. This profile/alignment only detects a fraction of this vast family. The poorly conserved N-terminal helix is missing from the alignment.
NODE_1_length_166950_cov_353.718	gene_199	136675	137361	-	PF09116.9	115	222	2e-51	172.4	1	gp45 sliding clamp, C terminal
NODE_1_length_166950_cov_353.718	gene_202	138060	139742	-	COG0419	5	391	3e-22	98.3	0.4	DNA repair exonuclease SbcCD ATPase subunit [Replication, recombination and repair].
NODE_1_length_166950_cov_353.718	gene_202	138060	139742	-	COG0419	154	539	9e-09	55.2	0.4	DNA repair exonuclease SbcCD ATPase subunit [Replication, recombination and repair].
NODE_1_length_166950_cov_353.718	gene_202	138060	139742	-	COG1121	20	67	0.0001	41.1	0.19	ABC-type Mn2+/Zn2+ transport system, ATPase component [Inorganic ion transport and metabolism].
NODE_1_length_166950_cov_353.718	gene_202	138060	139742	-	COG1196	163	538	9e-07	48.9	0.3	Chromosome segregation ATPase [Cell cycle control, cell division, chromosome partitioning].
NODE_1_length_166950_cov_353.718	gene_202	138060	139742	-	PF13476.5	8	244	2.5e-08	34.6	0.99	AAA domain
NODE_1_length_166950_cov_353.718	gene_202	138060	139742	-	PRK01156	6	390	7e-09	56.4	0.43	chromosome segregation protein; Provisional
NODE_1_length_166950_cov_353.718	gene_202	138060	139742	-	PRK02224	5	390	8e-11	62.4	0.4	chromosome segregation protein; Provisional
NODE_1_length_166950_cov_353.718	gene_202	138060	139742	-	PRK03918	33	403	1e-08	55.5	0.39	chromosome segregation protein; Provisional
NODE_1_length_166950_cov_353.718	gene_202	138060	139742	-	cd00267	20	54	3e-05	42.2	0.23	ATP-binding cassette transporter nucleotide-binding domain. ABC transporters are a large family of proteins involved in the transport of a wide variety of different compounds, like sugars, ions, peptides, and more complex organic molecules. The nucleotide-binding domain shows the highest similarity between all members of the family. ABC transporters are a subset of nucleotide hydrolases that cont…
NODE_1_length_166950_cov_353.718	gene_202	138060	139742	-	cd03227	1	65	4e-07	47.7	0.34	ATP-binding cassette domain of non-transporter proteins. ABC-type Class 2 contains systems involved in cellular processes other than transport. These families are characterized by the fact that the ABC subunit is made up of duplicated, fused ABC modules (ABC2). No known transmembrane proteins or domains are associated with these proteins.
NODE_1_length_166950_cov_353.718	gene_202	138060	139742	-	cd03240	6	100	2e-08	52.2	0.46	ATP-binding cassette domain of Rad50. The catalytic domains of Rad50 are similar to the ATP-binding cassette of ABC transporters, but are not associated with membrane-spanning domains. The conserved ATP-binding motifs common to Rad50 and the ABC transporter family include the Walker A and Walker B motifs, the Q loop, a histidine residue in the switch region, a D-loop, and a conserved LSGG sequenc…
NODE_1_length_166950_cov_353.718	gene_202	138060	139742	-	cd03279	1	138	5e-11	60.4	0.49	ATP-binding cassette domain of sbcCD. SbcCD and other Mre11/Rad50 (MR) complexes are implicated in the metabolism of DNA ends. They cleave ends sealed by hairpin structures and are thought to play a role in removing protein bound to DNA termini.
NODE_1_length_166950_cov_353.718	gene_202	138060	139742	-	cd03279	466	552	2e-08	52.3	0.41	ATP-binding cassette domain of sbcCD. SbcCD and other Mre11/Rad50 (MR) complexes are implicated in the metabolism of DNA ends. They cleave ends sealed by hairpin structures and are thought to play a role in removing protein bound to DNA termini.
NODE_1_length_166950_cov_353.718	gene_203	139739	139945	-	PF17589.1	1	66	8.9e-40	134.7	1	Family of unknown function (DUF5487)
NODE_1_length_166950_cov_353.718	gene_205	140186	141205	-	COG0420	1	311	2e-10	58.7	0.79	DNA repair exonuclease SbcCD nuclease subunit [Replication, recombination and repair].
NODE_1_length_166950_cov_353.718	gene_205	140186	141205	-	PF00149.27	1	206	8.3e-07	29.6	0.813725	Calcineurin-like phosphoesterase
NODE_1_length_166950_cov_353.718	gene_205	140186	141205	-	cd00840	2	87	5e-08	50	0.46	Mre11 nuclease, N-terminal metallophosphatase domain. Mre11 (also known as SbcD in Escherichia coli) is a subunit of the MRX protein complex. This complex includes: Mre11, Rad50, and Xrs2/Nbs1, and plays a vital role in several nuclear processes including DNA double-strand break repair, telomere length maintenance, cell cycle checkpoint control, and meiotic recombination, in eukaryotes. During do…
NODE_1_length_166950_cov_353.718	gene_206	141382	142584	-	PF11440.7	14	367	7.4e-237	785	0.997183	DNA alpha-glucosyltransferase
NODE_1_length_166950_cov_353.718	gene_209	143000	143317	-	PF10849.7	26	95	5.7e-43	144.9	1	Protein of unknown function (DUF2654)
NODE_1_length_166950_cov_353.718	gene_223	146927	147397	-	COG0602	10	145	3e-25	95.5	0.63	Organic radical activating enzyme [General function prediction only].
NODE_1_length_166950_cov_353.718	gene_223	146927	147397	-	COG1180	1	75	3e-08	48.1	0.29	Pyruvate-formate lyase-activating enzyme [Posttranslational modification, protein turnover, chaperones].
NODE_1_length_166950_cov_353.718	gene_223	146927	147397	-	PF13353.5	12	145	1.5e-46	158.1	0.992806	4Fe-4S single cluster domain
NODE_1_length_166950_cov_353.718	gene_223	146927	147397	-	PRK11121	1	143	1e-60	185	0.93	anaerobic ribonucleotide reductase-activating protein; Provisional
NODE_1_length_166950_cov_353.718	gene_223	146927	147397	-	PRK11145	6	52	2e-07	46.9	0.2	pyruvate formate lyase-activating enzyme 1; Provisional
NODE_1_length_166950_cov_353.718	gene_223	146927	147397	-	TIGR02491	2	148	1.1e-59	198.7	0.993506	NrdG: anaerobic ribonucleoside-triphosphate reductase activating protein
NODE_1_length_166950_cov_353.718	gene_223	146927	147397	-	cd01335	20	83	8e-06	41.9	0.32	Radical SAM superfamily. Enzymes of this family generate radicals by combining a 4Fe-4S cluster and S-adenosylmethionine (SAM) in close proximity. They are characterized by a conserved CxxxCxxC motif, which coordinates the conserved iron-sulfur cluster. Mechanistically, they share the transfer of a single electron from the iron-sulfur cluster to SAM, which leads to its reductive cleavage to methi…
NODE_1_length_166950_cov_353.718	gene_224	147394	149211	-	COG1328	3	604	0	674	0.84	Anaerobic ribonucleoside-triphosphate reductase [Nucleotide transport and metabolism].
NODE_1_length_166950_cov_353.718	gene_224	147394	149211	-	NF006732.0	2	604	1.5e-273	908.8	0.855337	PRK09263.1: anaerobic ribonucleoside-triphosphate reductase
NODE_1_length_166950_cov_353.718	gene_224	147394	149211	-	PF13597.5	21	604	4.4e-168	560.5	1	Anaerobic ribonucleoside-triphosphate reductase
NODE_1_length_166950_cov_353.718	gene_224	147394	149211	-	PRK07111	11	604	8e-133	407	0.78	anaerobic ribonucleoside triphosphate reductase; Provisional
NODE_1_length_166950_cov_353.718	gene_224	147394	149211	-	PRK08270	37	488	1e-21	97.2	0.55	anaerobic ribonucleoside triphosphate reductase; Provisional
NODE_1_length_166950_cov_353.718	gene_224	147394	149211	-	PRK08271	314	605	1e-07	52.3	0.4	anaerobic ribonucleoside triphosphate reductase; Provisional
NODE_1_length_166950_cov_353.718	gene_224	147394	149211	-	PRK09263	2	604	0	1048	0.84	anaerobic ribonucleoside triphosphate reductase; Provisional
NODE_1_length_166950_cov_353.718	gene_224	147394	149211	-	PRK14704	1	604	3e-126	387	0.95	anaerobic ribonucleoside triphosphate reductase; Provisional
NODE_1_length_166950_cov_353.718	gene_224	147394	149211	-	TIGR02487	20	604	3.4e-170	565.3	1	NrdD: anaerobic ribonucleoside-triphosphate reductase
NODE_1_length_166950_cov_353.718	gene_224	147394	149211	-	cd00576	51	538	7e-108	332	0.96	Ribonucleotide reductase and Pyruvate formate lyase. Ribonucleotide reductase (RNR) and pyruvate formate lyase (PFL) are believed to have diverged from a common ancestor. They have a structurally similar ten-stranded alpha-beta barrel domain that hosts the active site, and are radical enzymes. RNRs are found in all organisms and provide the only mechanism by which nucleotides are converted to deo…
NODE_1_length_166950_cov_353.718	gene_224	147394	149211	-	cd01675	21	584	0	658	0.94	Class III ribonucleotide reductase. Ribonucleotide reductase (RNR) catalyzes the reductive synthesis of deoxyribonucleotides from their corresponding ribonucleotides. It provides the precursors necessary for DNA synthesis. RNRs are separated into three classes based on their metallocofactor usage. Class I RNRs, found in eukaryotes, bacteria, and bacteriophage, use a diiron-tyrosyl radical. Class …
NODE_1_length_166950_cov_353.718	gene_225	149208	149681	-	PF09124.9	104	157	2.2e-33	114.1	1	T4 recombination endonuclease VII, dimerisation
NODE_1_length_166950_cov_353.718	gene_231	150930	151193	-	COG0695	13	87	7e-09	46.2	0.83	Glutaredoxin [Posttranslational modification, protein turnover, chaperones].
NODE_1_length_166950_cov_353.718	gene_231	150930	151193	-	PF00462.23	12	76	9.2e-09	35.3	0.9	Glutaredoxin
NODE_1_length_166950_cov_353.718	gene_231	150930	151193	-	PRK10638	14	82	2e-08	45.6	0.7	glutaredoxin 3; Provisional
NODE_1_length_166950_cov_353.718	gene_231	150930	151193	-	PRK11200	1	87	1e-05	37.7	0.84	glutaredoxin 1; Provisional
NODE_1_length_166950_cov_353.718	gene_231	150930	151193	-	cd02066	14	87	2e-10	50.9	0.88	Glutaredoxin (GRX) family; composed of GRX, approximately 10 kDa in size, and proteins containing a GRX or GRX-like domain. GRX is a glutathione (GSH) dependent reductase, catalyzing the disulfide reduction of target proteins such as ribonucleotide reductase. It contains a redox active CXXC motif in a TRX fold and uses a similar dithiol mechanism employed by TRXs for intramolecular disulfide bond…
NODE_1_length_166950_cov_353.718	gene_231	150930	151193	-	cd02976	14	80	2e-06	39.5	0.77	NrdH-redoxin (NrdH) family; NrdH is a small monomeric protein with a conserved redox active CXXC motif within a TRX fold, characterized by a glutaredoxin (GRX)-like sequence and TRX-like activity profile. In vitro, it displays protein disulfide reductase activity that is dependent on TRX reductase, not glutathione (GSH). It is part of the NrdHIEF operon, where NrdEF codes for class Ib ribonucleot…
NODE_1_length_166950_cov_353.718	gene_231	150930	151193	-	cd03029	14	86	2e-06	40.2	0.85	Glutaredoxin (GRX) family, PRX5 hybrid subfamily; composed of hybrid proteins containing peroxiredoxin (PRX) and GRX domains, which is found in some pathogenic bacteria and cyanobacteria. PRXs are thiol-specific antioxidant (TSA) proteins that confer a protective antioxidant role in cells through their peroxidase activity in which hydrogen peroxide, peroxynitrate, and organic hydroperoxides are r…
NODE_1_length_166950_cov_353.718	gene_231	150930	151193	-	cd03418	14	82	8e-12	54.9	0.79	Glutaredoxin (GRX) family, GRX bacterial class 1 and 3 (b_1_3)-like subfamily; composed of bacterial GRXs, approximately 10 kDa in size, and proteins containing a GRX or GRX-like domain. GRX is a glutathione (GSH) dependent reductase, catalyzing the disulfide reduction of target proteins such as ribonucleotide reductase. It contains a redox active CXXC motif in a TRX fold and uses a similar dithi…
NODE_1_length_166950_cov_353.718	gene_231	150930	151193	-	cd03419	14	87	5e-06	38.7	0.77	Glutaredoxin (GRX) family, GRX human class 1 and 2 (h_1_2)-like subfamily; composed of proteins similar to human GRXs, approximately 10 kDa in size, and proteins containing a GRX or GRX-like domain. GRX is a glutathione (GSH) dependent reductase, catalyzing the disulfide reduction of target proteins such as ribonucleotide reductase. It contains a redox active CXXC motif in a TRX fold and uses a s…
NODE_1_length_166950_cov_353.718	gene_242	158238	159248	-	PF10127.8	6	136	7.1e-13	48.6	0.497959	Predicted nucleotidyltransferase
NODE_1_length_166950_cov_353.718	gene_253	162756	163337	-	COG1435	1	191	2e-88	259	0.96	Thymidine kinase [Nucleotide transport and metabolism].
NODE_1_length_166950_cov_353.718	gene_253	162756	163337	-	NF003300.0	1	189	1.8e-80	268.6	0.984536	PRK04296.1-5: thymidine kinase
NODE_1_length_166950_cov_353.718	gene_253	162756	163337	-	PF00265.17	3	185	1.6e-62	210.4	0.99435	Thymidine kinase
NODE_1_length_166950_cov_353.718	gene_253	162756	163337	-	PRK04296	1	190	1e-96	280	0.99	thymidine kinase; Provisional
NODE_1_length_166950_cov_353.718	gene_258	164089	164568	-	COG2110	1	139	1e-14	65.4	0.75	O-acetyl-ADP-ribose deacetylase (regulator of RNase III), contains Macro domain [Translation, ribosomal structure and biogenesis].
NODE_1_length_166950_cov_353.718	gene_258	164089	164568	-	PF01661.20	22	136	2.8e-09	36.9	0.983051	Macro domain
NODE_1_length_166950_cov_353.718	gene_258	164089	164568	-	cd02901	1	138	5e-28	101	0.94	Macro domain, Poa1p_like family. The macro domain is a high-affinity ADP-ribose binding module found in a variety of proteins as a stand-alone domain or in combination with other domains like in histone macroH2A and some PARPs (poly ADP-ribose polymerases). Some macro domains recognize poly ADP-ribose as a ligand. Previously identified as displaying an Appr-1"-p (ADP-ribose-1"-monophosphate) proc…
NODE_1_length_166950_cov_353.718	gene_258	164089	164568	-	smart00506	2	137	4e-23	85	1	Appr-1"-p processing enzyme. Function determined by Martzen et al. Extended family detected by reciprocal PSI-BLAST searches (unpublished results, and Pehrson & Fuji).
NODE_1_length_166950_cov_353.718	gene_260	164899	165444	-	PF01464.19	61	153	7.9e-06	25.4	0.726496	Transglycosylase SLT domain
NODE_1_length_166950_cov_353.718	gene_260	164899	165444	-	cd00254	61	172	8e-05	38.2	0.92	Lytic Transglycosylase (LT) and Goose Egg White Lysozyme (GEWL) domain. Members include the soluble and insoluble membrane-bound LTs in bacteria, the LTs in bacteriophage lambda, as well as, the eukaryotic "goose-type" lysozymes (GEWL). LTs catalyze the cleavage of the beta-1,4-glycosidic bond between N-acetylmuramic acid (MurNAc) and N-acetyl-D-glucosamine (GlcNAc), as do "goose-type" lysozymes.…

## Sheet: HP3_Domains
Contig	Feature	Feature Start in Contig	Feature End in Contig	Feature Direction in Contig	Domain Accession	Domain Start in Feature	Domain End in Feature	E-value	Bit Score	Domain Coverage	Domain Description
scaffold1_cov15216	gene_0	3	476	-	PF05268.10	1	157	5.6e-95	317.8	0.611538	Phage tail fibre adhesin Gp38
scaffold1_cov15216	gene_1	510	3497	-	PF13884.5	883	939	4.7e-09	36.3	1	Chaperone of endosialidase
scaffold1_cov15216	gene_2	3506	4156	-	PF03903.12	1	216	5.1e-87	291	1	Phage T4 tail fibre
scaffold1_cov15216	gene_3	4219	5334	-	PF15711.4	58	113	5.2e-06	26.8	0.617978	Interleukin-like EMT inducer
scaffold1_cov15216	gene_5	9317	10234	+	COG0258	63	206	3e-06	45	0.43	5'-3' exonuclease [Replication, recombination and repair].
scaffold1_cov15216	gene_5	9317	10234	+	PF09293.9	183	305	8.3e-70	232.8	1	T4 RNase H, C terminal
scaffold1_cov15216	gene_5	9317	10234	+	PRK05755	113	240	4e-09	55.5	0.14	DNA polymerase I; Provisional
scaffold1_cov15216	gene_5	9317	10234	+	PRK09482	71	180	2e-08	51.8	0.36	flap endonuclease-like protein; Provisional
scaffold1_cov15216	gene_5	9317	10234	+	cd00008	15	180	5e-75	229	1	PIN domains of the 5'-3' exonucleases of DNA polymerase I, bacteriophage T4 RNase H and T5-5' nucleases, and homologs. PIN (PilT N terminus) domains of the 5'-3' exonucleases (53EXO) of mutli-domain DNA polymerase I and single domain protein homologs, as well as, the PIN domains of bacteriophage T5-5'nuclease (T5FEN or 5'-3'exonuclease), bacteriophage T4 RNase H (T4FEN), bacteriophage T3 (T3 phag…
scaffold1_cov15216	gene_5	9317	10234	+	cd09852	43	171	1e-11	59.1	0.93	PIN (PilT N terminus) domain: Superfamily. PIN_SF The PIN (PilT N terminus) domain belongs to a large nuclease superfamily with representatives from eukaryota, eubacteria, and archaea. PIN domains were originally named for their sequence similarity to the N-terminal domain of an annotated pili biogenesis protein, PilT, a domain fusion between a PIN-domain and a PilT ATPase domain. The structural …
scaffold1_cov15216	gene_5	9317	10234	+	cd09853	15	179	1e-66	207	0.98	PIN domains of structure-specific 5' nucleases (or flap endonuclease-1-like) involved in DNA replication, repair, and recombination. Structure-specific 5' nucleases are capable of both 5'-3' exonucleolytic activity and cleaving bifurcated or branched DNA, in an endonucleolytic, structure-specific manner. The family includes the PIN (PilT N terminus) domains of Flap Endonuclease-1 (FEN1), Exonucle…
scaffold1_cov15216	gene_5	9317	10234	+	cd09859	59	176	6e-11	58.2	0.57	PIN domain of the 5'-3' exonuclease of Taq DNA polymerase I and homologs. The 5'-3' exonuclease (53EXO) PIN (PilT N terminus) domain of multi-domain DNA polymerase I and single domain protein homologs are included in this family. Taq contains a polymerase domain for synthesizing a new DNA strand and a 53EXO PIN domain for cleaving RNA primers or damaged DNA strands. Taq's 53EXO PIN domain recogni…
scaffold1_cov15216	gene_5	9317	10234	+	cd09860	14	181	1e-68	212	0.95	PIN domain of bacteriophage T3, T4 RNase H, T5-5'nuclease, and homologs. PIN (PilT N terminus) domain of bacteriophage T5-5'nuclease (5'-3' exonuclease or T5FEN), bacteriophage T4 RNase H (T4FEN), bacteriophage T3 (T3 phage exodeoxyribonuclease) and other similar 5' nucleases are included in this family. T5-5'nuclease is a 5'-3'exodeoxyribonuclease that also exhibits endonucleolytic activity on f…
scaffold1_cov15216	gene_5	9317	10234	+	cd09899	184	259	5e-12	59.4	0.84	H3TH domain of bacteriophage T3, T4 RNase H, T5-5' nucleases, and homologs. H3TH (helix-3-turn-helix) domains of bacteriophage T5-5'nuclease (5'-3' exonuclease or T5FEN), bacteriophage T4 RNase H (T4FEN), bacteriophage T3 (T3 phage exodeoxyribonuclease) and other similar 5' nucleases are included in this family. The T5-5'nuclease is a 5'-3' exodeoxyribonuclease that also exhibits endonucleolytic …
scaffold1_cov15216	gene_5	9317	10234	+	smart00279	185	220	7e-08	43.6	1	Helix-hairpin-helix class 2 (Pol1 family) motifs.
scaffold1_cov15216	gene_5	9317	10234	+	smart00475	58	206	2e-14	66.1	0.5	5'-3' exonuclease.
scaffold1_cov15216	gene_6	10243	10512	+	PF11126.7	22	88	3.7e-41	139.1	1	Transcriptional regulator DsbA
scaffold1_cov15216	gene_7	10490	10828	+	PF16805.4	38	108	5.5e-28	96.8	0.985507	Phage late-transcription coactivator
scaffold1_cov15216	gene_8	10825	11478	+	PF08994.9	113	216	8.7e-55	183.6	1	T4 gene Gp59 loader of gp41 DNA helicase C-term
scaffold1_cov15216	gene_9	11480	12112	+	cd10444	3	97	2e-18	75.9	0.97	N-terminal catalytic GIY-YIG domain of bacteriophage T4 segABCDEFG gene encoding proteins. The prototypes of Seg family are proteins SegA, B, C, D, E, F, and G encoded by five seg genes segA, B, C, D, E, F, and G in the bacteriophage T4 genome, respectively. SegA, B, C, D, E, F, and G are not encoded by introns, but free-standing homologs of the GIY-YIG family of endonucleases encoded by group I …
scaffold1_cov15216	gene_10	12167	13072	+	PF08804.9	28	116	8.6e-52	173.2	1	gp32 DNA binding protein like
scaffold1_cov15216	gene_13	14015	14257	+	PF17438.1	15	77	4.4e-06	26.8	0.758242	Family of unknown function (DUF5417)
scaffold1_cov15216	gene_15	14513	15094	+	COG0262	1	148	5e-11	55.4	0.72	Dihydrofolate reductase [Coenzyme transport and metabolism].
scaffold1_cov15216	gene_15	14513	15094	+	PF00186.18	22	157	1.5e-17	63.6	0.708075	Dihydrofolate reductase
scaffold1_cov15216	gene_15	14513	15094	+	PRK10769	23	148	6e-06	42.4	0.64	dihydrofolate reductase; Provisional
scaffold1_cov15216	gene_15	14513	15094	+	cd00209	2	193	2e-17	74.9	0.95	Dihydrofolate reductase (DHFR). Reduces 7,8-dihydrofolate to 5,6,7,8-tetrahydrofolate with NADPH as a cofactor. This is an essential step in the biosynthesis of deoxythymidine phosphate since 5,6,7,8-tetrahydrofolate is required to regenerate 5,10-methylenetetrahydrofolate which is then utilized by thymidylate synthase. Inhibition of DHFR interrupts thymidilate synthesis and DNA replication, inhi…
scaffold1_cov15216	gene_17	15508	16059	+	COG0207	1	183	2e-70	215	0.63	Thymidylate synthase [Nucleotide transport and metabolism].
scaffold1_cov15216	gene_17	15508	16059	+	PF00303.18	2	183	2.4e-64	217	0.656716	Thymidylate synthase
scaffold1_cov15216	gene_17	15508	16059	+	PRK00956	109	182	1e-08	50.4	0.36	thymidylate synthase; Provisional
scaffold1_cov15216	gene_17	15508	16059	+	PRK01827	1	183	2e-84	251	0.64	thymidylate synthase; Reviewed
scaffold1_cov15216	gene_17	15508	16059	+	PRK13821	1	183	2e-48	161	0.55	thymidylate synthase; Provisional
scaffold1_cov15216	gene_17	15508	16059	+	TIGR03284	2	183	3.3e-59	198.4	0.692568	thym_sym: thymidylate synthase
scaffold1_cov15216	gene_17	15508	16059	+	cd00351	3	183	6e-72	218	0.78	Thymidylate synthase and pyrimidine hydroxymethylase: Thymidylate synthase (TS) and deoxycytidylate hydroxymethylase (dCMP-HMase) are homologs that catalyze analogous alkylation of C5 of pyrimidine nucleotides. Both enzymes are involved in the biosynthesis of DNA precursors and are active as homodimers. However, they exhibit distinct pyrimidine base specificities and differ in the details of thei…
scaffold1_cov15216	gene_18	16374	16688	+	COG0207	2	104	1e-26	98.1	0.34	Thymidylate synthase [Nucleotide transport and metabolism].
scaffold1_cov15216	gene_18	16374	16688	+	PF00303.18	2	104	1e-25	90.3	0.343284	Thymidylate synthase
scaffold1_cov15216	gene_18	16374	16688	+	PRK01827	2	104	5e-31	110	0.35	thymidylate synthase; Reviewed
scaffold1_cov15216	gene_18	16374	16688	+	PRK13821	3	104	8e-15	66.7	0.32	thymidylate synthase; Provisional
scaffold1_cov15216	gene_18	16374	16688	+	cd00351	2	45	2e-15	67.3	0.21	Thymidylate synthase and pyrimidine hydroxymethylase: Thymidylate synthase (TS) and deoxycytidylate hydroxymethylase (dCMP-HMase) are homologs that catalyze analogous alkylation of C5 of pyrimidine nucleotides. Both enzymes are involved in the biosynthesis of DNA precursors and are active as homodimers. However, they exhibit distinct pyrimidine base specificities and differ in the details of thei…
scaffold1_cov15216	gene_20	17246	19510	+	COG0209	47	753	0	554	0.98	Ribonucleotide reductase alpha subunit [Nucleotide transport and metabolism].
scaffold1_cov15216	gene_20	17246	19510	+	NF006578.0	3	752	2.8e-299	993.8	0.99343	PRK09103.1: ribonucleoside-diphosphate reductase subunit alpha
scaffold1_cov15216	gene_20	17246	19510	+	PF02867.14	220	663	2.3e-114	382.7	0.837786	Ribonucleotide reductase, barrel domain
scaffold1_cov15216	gene_20	17246	19510	+	PRK06406	185	671	7e-27	114	0.54	ribonucleotide-diphosphate reductase subunit alpha; Validated
scaffold1_cov15216	gene_20	17246	19510	+	PRK06539	4	727	2e-83	282	0.86	ribonucleotide-diphosphate reductase subunit alpha; Validated
scaffold1_cov15216	gene_20	17246	19510	+	PRK06948	391	634	5e-13	70.2	0.38	ribonucleotide reductase-like protein; Provisional
scaffold1_cov15216	gene_20	17246	19510	+	PRK07088	19	751	1e-101	331	0.92	ribonucleotide-diphosphate reductase subunit alpha; Validated
scaffold1_cov15216	gene_20	17246	19510	+	PRK07187	86	754	3e-47	176	0.9	ribonucleotide-diphosphate reductase subunit alpha; Validated
scaffold1_cov15216	gene_20	17246	19510	+	PRK07207	4	651	8e-65	231	0.64	ribonucleotide-diphosphate reductase subunit alpha; Validated
scaffold1_cov15216	gene_20	17246	19510	+	PRK07306	99	631	4e-29	121	0.72	ribonucleotide-diphosphate reductase subunit alpha; Validated
scaffold1_cov15216	gene_20	17246	19510	+	PRK07632	99	631	1e-38	151	0.74	ribonucleotide-diphosphate reductase subunit alpha; Validated
scaffold1_cov15216	gene_20	17246	19510	+	PRK08115	389	631	2e-18	88.4	0.26	ribonucleotide-diphosphate reductase subunit alpha; Validated
scaffold1_cov15216	gene_20	17246	19510	+	PRK08188	104	754	6e-37	145	0.83	ribonucleotide-diphosphate reductase subunit alpha; Validated
scaffold1_cov15216	gene_20	17246	19510	+	PRK08332	467	654	3e-18	87.5	0.11	ribonucleotide-diphosphate reductase subunit alpha; Validated
scaffold1_cov15216	gene_20	17246	19510	+	PRK08447	3	727	1e-96	318	0.89	ribonucleotide-diphosphate reductase subunit alpha; Validated
scaffold1_cov15216	gene_20	17246	19510	+	PRK08665	134	631	4e-26	111	0.55	ribonucleotide-diphosphate reductase subunit alpha; Validated
scaffold1_cov15216	gene_20	17246	19510	+	PRK09102	132	752	2e-54	196	0.89	ribonucleotide-diphosphate reductase subunit alpha; Validated
scaffold1_cov15216	gene_20	17246	19510	+	PRK09103	4	754	0	1060	0.99	ribonucleotide-diphosphate reductase subunit alpha; Validated
scaffold1_cov15216	gene_20	17246	19510	+	PRK09209	4	752	2e-93	309	0.94	ribonucleotide-diphosphate reductase subunit alpha; Validated
scaffold1_cov15216	gene_20	17246	19510	+	PRK12364	12	752	7e-89	298	0.83	ribonucleotide-diphosphate reductase subunit alpha; Provisional
scaffold1_cov15216	gene_20	17246	19510	+	PRK12365	2	653	2e-72	254	0.61	ribonucleotide-diphosphate reductase subunit alpha; Provisional
scaffold1_cov15216	gene_20	17246	19510	+	TIGR02506	143	731	2.4e-160	532.9	1	NrdE_NrdA: ribonucleoside-diphosphate reductase, alpha subunit
scaffold1_cov15216	gene_20	17246	19510	+	cd00576	192	728	1e-32	129	0.93	Ribonucleotide reductase and Pyruvate formate lyase. Ribonucleotide reductase (RNR) and pyruvate formate lyase (PFL) are believed to have diverged from a common ancestor. They have a structurally similar ten-stranded alpha-beta barrel domain that hosts the active site, and are radical enzymes. RNRs are found in all organisms and provide the only mechanism by which nucleotides are converted to deo…
scaffold1_cov15216	gene_20	17246	19510	+	cd01679	167	730	5e-141	424	0.99	Class I ribonucleotide reductase. Ribonucleotide reductase (RNR) catalyzes the reductive synthesis of deoxyribonucleotides from their corresponding ribonucleotides. It provides the precursors necessary for DNA synthesis. RNRs are separated into three classes based on their metallocofactor usage. Class I RNRs, found in eukaryotes, bacteria, and many viruses, use a diiron-tyrosyl radical. Class II …
scaffold1_cov15216	gene_20	17246	19510	+	cd02888	192	637	5e-49	178	0.86	Class II ribonucleotide reductase, dimeric form. Ribonucleotide reductase (RNR) catalyzes the reductive synthesis of deoxyribonucleotides from their corresponding ribonucleotides. It provides the precursors necessary for DNA synthesis. RNRs are separated into three classes based on their metallocofactor usage. Class I RNRs, found in eukaryotes, bacteria, and bacteriophage, use a diiron-tyrosyl ra…
scaffold1_cov15216	gene_21	19562	20740	+	COG0208	1	382	2e-73	233	0.98	Ribonucleotide reductase beta subunit, ferritin-like domain [Nucleotide transport and metabolism].
scaffold1_cov15216	gene_21	19562	20740	+	NF006576.0	3	388	1.8e-144	480.6	0.986702	PRK09101.1: ribonucleotide-diphosphate reductase subunit beta
scaffold1_cov15216	gene_21	19562	20740	+	PF00268.20	33	335	7.5e-35	120.7	0.938849	Ribonucleotide reductase, small chain
scaffold1_cov15216	gene_21	19562	20740	+	PRK07209	48	352	2e-11	62.7	0.72	ribonucleotide-diphosphate reductase subunit beta; Validated
scaffold1_cov15216	gene_21	19562	20740	+	PRK09101	3	382	5e-179	505	0.97	ribonucleotide-diphosphate reductase subunit beta; Reviewed
scaffold1_cov15216	gene_21	19562	20740	+	PRK09614	16	383	3e-25	102	0.97	ribonucleotide-diphosphate reductase subunit beta; Reviewed
scaffold1_cov15216	gene_21	19562	20740	+	PRK13965	47	161	2e-06	47.1	0.34	ribonucleotide-diphosphate reductase subunit beta; Provisional
scaffold1_cov15216	gene_21	19562	20740	+	PRK13967	29	161	4e-06	45.9	0.41	ribonucleotide-diphosphate reductase subunit beta; Provisional
scaffold1_cov15216	gene_21	19562	20740	+	cd01049	28	355	3e-69	221	0.99	Ribonucleotide Reductase, R2/beta subunit, ferritin-like diiron-binding domain. Ribonucleotide Reductase, R2/beta subunit (RNRR2) is a member of a broad superfamily of ferritin-like diiron-carboxylate proteins. The RNR protein catalyzes the conversion of ribonucleotides to deoxyribonucleotides and is found in all eukaryotes, many prokaryotes, several viruses, and few archaea. The catalytically ac…
scaffold1_cov15216	gene_22	20768	21178	+	PF01541.23	34	112	4.1e-06	26.9	0.769231	GIY-YIG catalytic domain
scaffold1_cov15216	gene_22	20768	21178	+	cd00719	36	125	6e-06	39.3	0.98	GIY-YIG nuclease domain superfamily. The GIY-YIG nuclease domain superfamily includes a large and diverse group of proteins involved in many cellular processes, such as class I homing GIY-YIG family endonucleases, prokaryotic nucleotide excision repair proteins UvrC and Cho, type II restriction enzymes, the endonuclease/reverse transcriptase of eukaryotic retrotransposable elements, and a family …
scaffold1_cov15216	gene_22	20768	21178	+	cd10434	42	71	0.0001	36.3	0.38	Catalytic GIY-YIG domain of nucleotide excision repair endonucleases UvrC, Cho, and similar proteins. UvrC is essential for nucleotide excision repair (NER). The N-terminal catalytic GIY-YIG domain of UvrC (also known as Uri domain) is responsible for the 3' incision reaction and the C-terminal half of UvrC, consisting of an UvrB-binding domain (UvrBb), EndoV-like nuclease domain and a helix-hair…
scaffold1_cov15216	gene_22	20768	21178	+	cd10436	34	132	3e-30	105	0.99	Catalytic GIY-YIG domain of coliphage T4 non-specific endonuclease II, type II restriction endonuclease R.Hpy188I, and similar proteins. This family includes two different GIY-YIG enzymes, coliphage T4 non-specific endonuclease II (EndoII), and type II restriction endonuclease R.Hpy188I. They display high sequence similarity to each other, and both of them contain an extra N-terminal hairpin that…
scaffold1_cov15216	gene_22	20768	21178	+	smart00465	33	135	5e-09	44.7	0.98	GIY-YIG type nucleases (URI domain).
scaffold1_cov15216	gene_23	21231	22355	+	PF09511.9	52	246	4.3e-24	85.5	1	RNA ligase
scaffold1_cov15216	gene_23	21231	22355	+	TIGR02308	2	374	4.5e-191	632.8	1	RNA_lig_T4_1: RNA ligase, T4 RnlA family
scaffold1_cov15216	gene_24	22417	22923	+	PF17527.1	2	167	1.9e-94	313.9	0.994012	Phage ALP protein
scaffold1_cov15216	gene_29	24104	25009	+	COG0563	3	130	6e-07	45.7	0.7	Adenylate kinase or related kinase [Nucleotide transport and metabolism].
scaffold1_cov15216	gene_29	24104	25009	+	COG0645	3	123	1e-07	47.8	0.7	Predicted kinase [General function prediction only].
scaffold1_cov15216	gene_29	24104	25009	+	COG4088	2	145	2e-05	42.5	0.52	tRNA Uridine 5-carbamoylmethylation protein Kti12 (Killer toxin insensitivity protein) [Translation, ribosomal structure and biogenesis].
scaffold1_cov15216	gene_29	24104	25009	+	COG4639	2	150	6e-15	68.6	0.83	Predicted kinase [General function prediction only].
scaffold1_cov15216	gene_29	24104	25009	+	PF13671.5	6	146	1.6e-20	73.6	0.965035	AAA domain
scaffold1_cov15216	gene_29	24104	25009	+	cd01427	161	296	6e-05	39.7	1	Haloacid dehalogenase-like hydrolases. The haloacid dehalogenase-like (HAD) superfamily includes L-2-haloacid dehalogenase, epoxide hydrolase, phosphoserine phosphatase, phosphomannomutase, phosphoglycolate phosphatase, P-type ATPase, and many others. This superfamily includes a variety of enzymes that catalyze the cleavage of substrate C-Cl, P-C, and P-OP bonds via nucleophilic substitution path…
scaffold1_cov15216	gene_29	24104	25009	+	cd07502	159	301	1e-64	201	0.94	C-terminal phosphatase domain of T4 polynucleotide kinase/phosphatase (PNKP) and related phosphatases. This family includes the C-terminal domain of the bifunctional enzyme T4 polynucleotide kinase/phosphatase, PNKP. The PNKP phosphatase domain can catalyze the hydrolytic removal of the 3'-phosphoryl of DNA, RNA and deoxynucleoside 3'-monophosphates. This family belongs to the haloacid dehalogena…
scaffold1_cov15216	gene_36	26829	27410	+	COG0117	24	183	2e-14	65	0.68	Pyrimidine deaminase domain of riboflavin biosynthesis protein RibD [Coenzyme transport and metabolism].
scaffold1_cov15216	gene_36	26829	27410	+	COG0590	104	168	9e-15	66.2	0.43	tRNA(Arg) A34 adenosine deaminase TadA [Translation, ribosomal structure and biogenesis].
scaffold1_cov15216	gene_36	26829	27410	+	COG2131	1	179	3e-41	137	0.91	Deoxycytidylate deaminase [Nucleotide transport and metabolism].
scaffold1_cov15216	gene_36	26829	27410	+	PF00383.22	3	151	6.6e-38	128.6	0.970297	Cytidine and deoxycytidylate deaminase zinc-binding region
scaffold1_cov15216	gene_36	26829	27410	+	PRK10786	102	148	5e-06	43.6	0.12	bifunctional diaminohydroxyphosphoribosylaminopyrimidine deaminase/5-amino-6-(5-phosphoribosylamino)uracil reductase; Provisional
scaffold1_cov15216	gene_36	26829	27410	+	PRK10860	104	149	3e-05	40.6	0.25	tRNA-specific adenosine deaminase; Provisional
scaffold1_cov15216	gene_36	26829	27410	+	cd00786	102	145	4e-10	52.6	0.45	Cytidine and deoxycytidylate deaminase zinc-binding region. The family contains cytidine deaminases, nucleoside deaminases, deoxycytidylate deaminases and riboflavin deaminases. Also included are the apoBec family of mRNA editing enzymes. All members are Zn dependent. The zinc ion in the active site plays a central role in the proposed catalytic mechanism, activating a water molecule to form a hy…
scaffold1_cov15216	gene_36	26829	27410	+	cd01284	104	168	3e-12	59.2	0.54	Riboflavin-specific deaminase. Riboflavin biosynthesis protein RibD (Diaminohydroxyphosphoribosylaminopyrimidine deaminase) catalyzes the deamination of 2,5-diamino-6-ribosylamino-4(3H)-pyrimidinone 5'-phosphate, which is an intermediate step in the biosynthesis of riboflavin.The ribG gene of Bacillus subtilis and the ribD gene of E. coli are bifunctional and contain this deaminase domain and a r…
scaffold1_cov15216	gene_36	26829	27410	+	cd01285	104	152	1e-13	62.6	0.45	Nucleoside deaminases include adenosine, guanine and cytosine deaminases. These enzymes are Zn dependent and catalyze the deamination of nucleosides. The zinc ion in the active site plays a central role in the proposed catalytic mechanism, activating a water molecule to form a hydroxide ion that performs a nucleophilic attack on the substrate. The functional enzyme is a homodimer. Cytosine deamin…
scaffold1_cov15216	gene_36	26829	27410	+	cd01286	7	165	2e-54	170	0.97	Deoxycytidylate deaminase domain. Deoxycytidylate deaminase catalyzes the deamination of dCMP to dUMP, providing the nucleotide substrate for thymidylate synthase. The enzyme binds Zn++, which is required for catalytic activity. The activity of the enzyme is allosterically regulated by the ratio of dCTP to dTTP not only in eukaryotic cells but also in T-even phage-infected Escherichia coli, with …
scaffold1_cov15216	gene_38	27647	27955	+	PF10902.7	13	86	4.9e-19	68.4	0.986486	WYL_2, Sm-like SH3 beta-barrel fold
scaffold1_cov15216	gene_39	28012	28347	+	PF00166.20	8	110	3e-15	55.9	1	Chaperonin 10 Kd subunit
scaffold1_cov15216	gene_39	28012	28347	+	cd00320	8	110	2e-07	43.3	0.93	Chaperonin 10 Kd subunit (cpn10 or GroES); Cpn10 cooperates with chaperonin 60 (cpn60 or GroEL), an ATPase, to assist the folding and assembly of proteins and is found in eubacterial cytosol, as well as in the matrix of mitochondria and chloroplasts. It forms heptameric rings with a dome-like structure, forming a lid to the large cavity of the tetradecameric cpn60 cylinder and thereby tightly reg…
scaffold1_cov15216	gene_42	29275	29607	+	PF06019.10	1	110	4.7e-57	191.1	1	Phage GP30.8 protein
scaffold1_cov15216	gene_47	30761	31219	+	PF08010.10	11	150	3.2e-70	234.2	1	Bacteriophage protein GP30.3
scaffold1_cov15216	gene_47	30761	31219	+	cd15457	8	123	3e-05	39.5	0.69	Escherichia coli swarming motility protein YbiA and related proteins. This family of uncharacterized domains was initially classified as Domain of Unknown Function (DUF1768). It contains members such as the E. coli swarming motility protein YbiA. Mutations in YbiA cause defects in Escherichia coli swarming, but not necessarily in motility. More recently, this family has been predicted to be invol…
scaffold1_cov15216	gene_50	32321	33784	+	COG1793	134	480	7e-18	83.2	0.68	ATP-dependent DNA ligase [Replication, recombination and repair].
scaffold1_cov15216	gene_50	32321	33784	+	PF01068.20	135	367	5.2e-44	150.2	1	ATP dependent DNA ligase domain
scaffold1_cov15216	gene_50	32321	33784	+	PRK01109	124	411	2e-06	48	0.41	ATP-dependent DNA ligase; Provisional
scaffold1_cov15216	gene_50	32321	33784	+	PRK09125	277	412	1e-06	47.9	0.45	DNA ligase; Provisional
scaffold1_cov15216	gene_50	32321	33784	+	cd07896	136	367	2e-09	54.5	0.97	Adenylation domain of kDNA ligases and similar proteins. The mitochondrial DNA of parasitic protozoans is highly unusual. It is termed the kinetoplast DNA (kDNA) and consists of circular DNA molecules (maxicircles) and several thousand smaller circular molecules (minicircles). This group is composed of kDNA ligase, Chlorella virus DNA ligase, and similar proteins. kDNA ligase and Chlorella virus …
scaffold1_cov15216	gene_50	32321	33784	+	cd07901	298	367	6e-06	44.8	0.34	Adenylation domain of archaeal and bacterial LigB-like DNA ligases. ATP-dependent polynucleotide ligases catalyze phosphodiester bond formation using nicked nucleic acid substrates with the high energy nucleotide of ATP as a cofactor in a three step reaction mechanism. DNA ligases play a vital role in the diverse processes of DNA replication, recombination and repair. ATP-dependent ligases are pr…
scaffold1_cov15216	gene_50	32321	33784	+	cd07903	136	367	4e-05	42.6	0.88	Adenylation domain of DNA Ligase IV. ATP-dependent polynucleotide ligases catalyze phosphodiester bond formation using nicked nucleic acid substrates with the high energy nucleotide of ATP as a cofactor in a three step reaction mechanism. DNA ligases play a vital role in the diverse processes of DNA replication, recombination and repair. ATP-dependent ligases are present in many organisms such as…
scaffold1_cov15216	gene_50	32321	33784	+	cd07905	159	233	2e-05	43	0.32	Adenylation domain of Mycobacterium tuberculosis LigC-like ATP-dependent DNA ligases. Bacterial DNA ligases are divided into two broad classes: NAD-dependent and ATP-dependent. All bacterial species have a NAD-dependent DNA ligase (LigA). Some bacterial genomes contain multiple genes for DNA ligases that are predicted to use ATP as their cofactor, including Mycobacterium tuberculosis LigB, LigC, …
scaffold1_cov15216	gene_52	34022	36076	+	PF03496.13	374	615	2.8e-57	193.2	1	ADP-ribosyltransferase exoenzyme
scaffold1_cov15216	gene_52	34022	36076	+	cd00233	381	612	8e-49	169	0.92	VIP2; A family of actin-ADP-ribosylating toxin. A member of the Bacillus-prodiced vegetative insecticidal proteins (VIPs) possesses high specificity against the major insect pest, corn rootworms, and belongs to a classs of binary toxins and regulators of biological pathways distinct from classical A-B toxins. A novel family of insecticidal ADP-ribosyltransferses were isolated from Bacillus cereus…
scaffold1_cov15216	gene_53	36080	38137	+	PF03496.13	410	617	1.8e-24	86.1	0.923858	ADP-ribosyltransferase exoenzyme
scaffold1_cov15216	gene_53	36080	38137	+	cd00233	417	622	7e-15	72.4	0.78	VIP2; A family of actin-ADP-ribosylating toxin. A member of the Bacillus-prodiced vegetative insecticidal proteins (VIPs) possesses high specificity against the major insect pest, corn rootworms, and belongs to a classs of binary toxins and regulators of biological pathways distinct from classical A-B toxins. A novel family of insecticidal ADP-ribosyltransferses were isolated from Bacillus cereus…
scaffold1_cov15216	gene_54	38198	38488	+	PF17602.1	1	96	1.1e-64	214.9	1	Family of unknown function (DUF5498)
scaffold1_cov15216	gene_55	38517	39482	-	PF06841.11	154	247	2.4e-05	24.1	0.619403	T4-like virus tail tube protein gp19
scaffold1_cov15216	gene_56	39482	40576	-	PF11091.7	5	358	6.8e-160	531.6	0.994253	Tail-tube assembly protein
scaffold1_cov15216	gene_58	42354	42812	-	PF11110.7	1	151	2.7e-106	351.9	0.980519	Baseplate hub distal subunit
scaffold1_cov15216	gene_60	44004	44756	-	PF12322.7	5	201	5.5e-65	218.6	1	T4 bacteriophage base plate protein
scaffold1_cov15216	gene_61	44807	45433	+	PF12322.7	4	206	8.3e-71	237.6	1	T4 bacteriophage base plate protein
scaffold1_cov15216	gene_62	45433	45831	+	COG3628	28	100	7e-10	50.5	0.63	Phage baseplate assembly protein W [Mobilome: prophages, transposons].
scaffold1_cov15216	gene_62	45433	45831	+	PF04965.13	30	116	3.3e-16	58.7	0.947368	Gene 25-like lysozyme
scaffold1_cov15216	gene_63	45898	46311	+	PF11056.7	9	137	5.2e-50	169	1	Recombination, repair and ssDNA binding protein UvsY
scaffold1_cov15216	gene_65	46564	46731	+	PF10886.7	3	55	1e-34	118.4	1	Protein of unknown function (DUF2685)
scaffold1_cov15216	gene_66	46787	47017	-	PF11637.7	21	74	1.9e-30	104.6	1	ATP-dependant DNA helicase UvsW
scaffold1_cov15216	gene_67	47043	48554	-	COG1061	118	458	1e-30	121	0.75	Superfamily II DNA or RNA helicase [Transcription, Replication, recombination and repair].
scaffold1_cov15216	gene_67	47043	48554	-	COG1111	113	240	2e-08	53.5	0.24	ERCC4-related helicase [Replication, recombination and repair].
scaffold1_cov15216	gene_67	47043	48554	-	COG1204	118	248	9e-09	55.1	0.17	Replicative superfamily II helicase [Replication, recombination and repair].
scaffold1_cov15216	gene_67	47043	48554	-	COG4096	99	457	5e-10	59	0.4	Type I site-specific restriction endonuclease, part of a restriction-modification system [Defense mechanisms].
scaffold1_cov15216	gene_67	47043	48554	-	PF04851.14	128	261	2.5e-14	53.6	0.847953	Type III restriction enzyme, res subunit
scaffold1_cov15216	gene_67	47043	48554	-	PRK13766	136	240	1e-06	49.1	0.13	Hef nuclease; Provisional
scaffold1_cov15216	gene_67	47043	48554	-	cd00046	130	263	4e-11	59.7	0.94	DEAD-like helicases superfamily. A diverse family of proteins involved in ATP-dependent RNA or DNA unwinding. This domain contains the ATP-binding region.
scaffold1_cov15216	gene_67	47043	48554	-	cd00079	331	448	3e-11	59.6	0.89	Helicase superfamily c-terminal domain; associated with DEXDc-, DEAD-, and DEAH-box proteins, yeast initiation factor 4A, Ski2p, and Hepatitis C virus NS3 helicases; this domain is found in a wide variety of helicases and helicase related proteins; may not be an autonomously folding unit, but an integral part of the helicase; 4 helicase superfamilies at present according to the organization of th…
scaffold1_cov15216	gene_67	47043	48554	-	smart00487	110	281	5e-18	77.1	0.85	DEAD-like helicases superfamily.
scaffold1_cov15216	gene_67	47043	48554	-	smart00490	366	444	2e-08	46.8	0.96	helicase superfamily c-terminal domain.
scaffold1_cov15216	gene_69	49295	50713	+	PF00801.19	106	175	7.3e-09	35.3	0.901408	PKD domain
scaffold1_cov15216	gene_69	49295	50713	+	PF00801.19	200	271	1.4e-08	34.3	0.929577	PKD domain
scaffold1_cov15216	gene_70	50821	51006	+	PF11242.7	1	60	2.6e-29	101.1	0.936508	Protein of unknown function (DUF2774)
scaffold1_cov15216	gene_72	51298	52302	+	PF09414.9	29	227	2.9e-24	86.1	0.993789	RNA ligase
scaffold1_cov15216	gene_72	51298	52302	+	TIGR02307	2	334	3.3e-139	461.9	1	RNA_lig_RNL2: RNA ligase, Rnl2 family
scaffold1_cov15216	gene_73	52332	53615	-	PF07068.10	143	232	7.2e-09	34.8	0.178782	Major capsid protein Gp23
scaffold1_cov15216	gene_74	53699	55264	-	PF07068.10	9	501	2.5e-303	1006.3	1	Major capsid protein Gp23
scaffold1_cov15216	gene_76	56123	56761	-	PF03420.12	6	190	2.1e-116	386	1	Prohead core protein serine protease
scaffold1_cov15216	gene_79	57425	58999	-	PF07230.10	6	508	0	1045.7	1	Bacteriophage T4-like capsid assembly protein (Gp20)
scaffold1_cov15216	gene_80	59083	59574	-	PF06841.11	19	163	1.5e-17	63.6	0.985075	T4-like virus tail tube protein gp19
scaffold1_cov15216	gene_82	60338	62317	-	COG3497	405	645	7e-08	52	0.6	Phage tail sheath protein FI [Mobilome: prophages, transposons].
scaffold1_cov15216	gene_82	60338	62317	-	PF04984.13	348	541	1.9e-46	157.9	1	Phage tail sheath protein subtilisin-like domain
scaffold1_cov15216	gene_83	62349	64181	-	PF17289.1	399	572	1.7e-44	151.5	0.987097	Terminase RNaseH-like domain
scaffold1_cov15216	gene_84	64165	64659	-	PF11053.7	1	149	1.6e-87	291.2	1	Terminase DNA packaging enzyme
scaffold1_cov15216	gene_85	64668	65486	-	PF16724.4	1	234	9.7e-144	477	1	T4-like virus Myoviridae tail sheath stabiliser
scaffold1_cov15216	gene_86	65528	66298	-	PF11649.7	3	249	1.8e-135	450.6	0.928058	Virus neck protein
scaffold1_cov15216	gene_88	67261	68718	-	PF07921.11	371	481	1.2e-34	118.2	0.989247	Fibritin C-terminal region
scaffold1_cov15216	gene_89	68728	70278	-	COG4675	336	406	2e-08	51	0.42	Microcystin-dependent protein (function unknown) [Function unknown].
scaffold1_cov15216	gene_89	68728	70278	-	PF14928.5	403	514	1.5e-39	134.9	0.941667	Short tail fibre protein receptor-binding domain
scaffold1_cov15216	gene_91	70934	72739	-	PF07880.10	2	264	1.7e-101	339.4	0.996491	Bacteriophage T4 gp9/10-like protein
scaffold1_cov15216	gene_92	72739	73605	-	PF07880.10	7	271	1.4e-116	389	0.996491	Bacteriophage T4 gp9/10-like protein
scaffold1_cov15216	gene_94	74666	77764	-	cd00063	8	102	5e-05	41.7	0.93	Fibronectin type 3 domain; One of three types of internal repeats found in the plasma protein fibronectin. Its tenth fibronectin type III repeat contains an RGD cell recognition sequence in a flexible loop between 2 strands. Approximately 2% of all animal proteins contain the FN3 repeat; including extracellular and intracellular proteins, membrane spanning cytokine receptors, growth hormone recep…
scaffold1_cov15216	gene_96	79752	80045	-	PF05488.12	13	88	1.6e-06	28.1	0.971429	PAAR motif
scaffold1_cov15216	gene_96	79752	80045	-	cd14737	2	97	4e-29	100	1	proline-alanine-alanine-arginine (PAAR) domain. This domain is found in the PAAR (proline-alanine-alanine-arginine) repeat family, where it forms a sharp conical extension on the VgrG spike, a trimeric protein complex of the bacterial type VI secretion system (T6SS). The T6SS is responsible for translocation of a wide variety of toxic effector molecules, allowing predatory cells to kill prokaryot…
scaffold1_cov15216	gene_98	80575	82302	-	COG3772	184	323	4e-05	41.2	0.72	Phage-related lysozyme (muramidase), GH24 family [Cell wall/membrane/envelope biogenesis].
scaffold1_cov15216	gene_98	80575	82302	-	PF06714.10	33	173	3.3e-65	218.6	1	Gp5 N-terminal OB domain
scaffold1_cov15216	gene_98	80575	82302	-	cd00735	175	340	3e-106	318	1	Bacteriophage T4-like lysozymes hydrolyse the beta-1,4-glycosidic bond between N-acetylmuramic acid (MurNAc) and N-acetylglucosamine (GlcNAc) in peptidoglycan heteropolymers of prokaryotic cell walls. Members include a variety of bacteriophages (T4, RB49, RB69, Aeh1) as well as Dictyostelium.
scaffold1_cov15216	gene_98	80575	82302	-	cd00737	178	304	3e-08	51.1	0.73	Endolysins and autolysins are found in viruses and bacteria, respectively. The ds DNA phages of eubacteria use endolysins or muralytic enzymes in conjunction with hollin, a small membrane protein, to degrade the peptidoglycan found in bacterial cell walls. Similarly, bacteria produce autolysins to facilitate the biosynthesis of its cell wall hetropolymer peptidoglycan and cell division. Both endo…
scaffold1_cov15216	gene_99	82286	82876	-	PF11246.7	1	187	9.3e-91	302.5	1	Base plate wedge protein 53
scaffold1_cov15216	gene_102	84307	84837	+	PF06841.11	14	165	4.1e-17	62.2	0.992537	T4-like virus tail tube protein gp19
scaffold1_cov15216	gene_119	93926	94366	+	COG0494	6	126	3e-08	47.2	0.71	8-oxo-dGTP pyrophosphatase MutT and related house-cleaning NTP pyrophosphohydrolases, NUDIX family [Defense mechanisms].
scaffold1_cov15216	gene_119	93926	94366	+	COG1051	1	77	5e-05	38.1	0.47	ADP-ribose pyrophosphatase YjhB, NUDIX family [Nucleotide transport and metabolism].
scaffold1_cov15216	gene_119	93926	94366	+	PF00293.27	2	130	9.7e-14	51.4	0.931298	NUDIX domain
scaffold1_cov15216	gene_119	93926	94366	+	PRK10776	1	74	4e-06	41.1	0.54	nucleoside triphosphate pyrophosphohydrolase; Provisional
scaffold1_cov15216	gene_119	93926	94366	+	cd02883	4	102	2e-10	53.3	0.74	Nudix hydrolase is a superfamily of enzymes found in all three kingdoms of life, and it catalyzes the hydrolysis of NUcleoside DIphosphates linked to other moieties, X. Enzymes belonging to this superfamily require a divalent cation, such as Mg2+ or Mn2+ for their activity. Members of this family are recognized by a highly conserved 23-residue nudix motif (GX5EX7REUXEEXGU, where U = I, L or V), w…
scaffold1_cov15216	gene_119	93926	94366	+	cd03424	28	82	7e-06	40.6	0.37	ADP-ribose pyrophosphatase (ADPRase) catalyzes the hydrolysis of ADP-ribose and a variety of additional ADP-sugar conjugates to AMP and ribose-5-phosphate. Like other members of the Nudix hydrolase superfamily, it requires a divalent cation, such as Mg2+, for its activity. It also contains a highly conserved 23-residue Nudix motif (GX5EX7REUXEEXGU, where U = I, L or V) which functions as a metal …
scaffold1_cov15216	gene_119	93926	94366	+	cd03426	26	76	3e-05	39.4	0.31	Coenzyme A pyrophosphatase (CoAse), a member of the Nudix hydrolase superfamily, functions to catalyze the elimination of oxidized inactive CoA, which can inhibit CoA-utilizing enzymes. The need of CoAses mainly arises under conditions of oxidative stress. CoAse has a conserved Nudix fold and requires a single divalent cation for catalysis. In addition to a signature Nudix motif G[X5]E[X7]REUXEEX…
scaffold1_cov15216	gene_119	93926	94366	+	cd03428	33	80	3e-08	47.2	0.34	Diadenosine tetraphosphate (Ap4A) hydrolase is a member of the Nudix hydrolase superfamily. Ap4A hydrolases are well represented in a variety of prokaryotic and eukaryotic organisms. Phylogenetic analysis reveals two distinct subgroups where plant enzymes fall into one subfamily and fungi/animals/archaea enzymes, represented by this subfamily, fall into another. Bacterial enzymes are found in bot…
scaffold1_cov15216	gene_119	93926	94366	+	cd03673	35	75	3e-05	38.8	0.29	Diadenosine hexaphosphate (Ap6A) hydrolase is a member of the Nudix hydrolase superfamily. Ap6A hydrolase specifically hydrolyzes diadenosine polyphosphates, but not ATP or diadenosine triphosphate, and it generates ATP as the product. Ap6A, the most preferred substrate, hydrolyzes to produce two ATP molecules, which is a novel hydrolysis mode for Ap6A. These results indicate that Ap6A hydrolase …
scaffold1_cov15216	gene_119	93926	94366	+	cd04662	4	83	2e-06	41.7	0.54	Members of the Nudix hydrolase superfamily catalyze the hydrolysis of NUcleoside DIphosphates linked to other moieties, X. Enzymes belonging to this superfamily require a divalent cation, such as Mg2+ or Mn2+, for their activity and contain a highly conserved 23-residue nudix motif (GX5EX7REUXEEXGU, where U = I, L or V), which functions as a metal binding and catalytic site. Substrates of nudix h…
scaffold1_cov15216	gene_119	93926	94366	+	cd04666	22	99	1e-07	45.3	0.54	Members of the Nudix hydrolase superfamily catalyze the hydrolysis of NUcleoside DIphosphates linked to other moieties, X. Enzymes belonging to this superfamily require a divalent cation, such as Mg2+ or Mn2+, for their activity and contain a highly conserved 23-residue nudix motif (GX5EX7REUXEEXGU, where U = I, L or V), which functions as a metal binding and catalytic site. Substrates of nudix h…
scaffold1_cov15216	gene_119	93926	94366	+	cd04671	34	64	4e-05	38.6	0.25	Members of the Nudix hydrolase superfamily catalyze the hydrolysis of NUcleoside DIphosphates linked to other moieties, X. Enzymes belonging to this superfamily require a divalent cation, such as Mg2+ or Mn2+, for their activity and contain a highly conserved 23-residue nudix motif (GX5EX7REUXEEXGU, where U = I, L or V), which functions as a metal binding and catalytic site. Substrates of nudix h…
scaffold1_cov15216	gene_119	93926	94366	+	cd04684	20	64	8e-05	37.6	0.35	Contains a crystal structure of the Nudix hydrolase from Enterococcus faecalis, which has an unknown function. In general, members of the Nudix hydrolase superfamily catalyze the hydrolysis of NUcleoside DIphosphates linked to other moieties, X. Enzymes belonging to this superfamily require a divalent cation, such as Mg2+ or Mn2+, for their activity. They also contain a highly conserved 23-residu…
scaffold1_cov15216	gene_119	93926	94366	+	cd04699	6	64	2e-05	39.7	0.42	Members of the Nudix hydrolase superfamily catalyze the hydrolysis of NUcleoside DIphosphates linked to other moieties, X. Enzymes belonging to this superfamily require a divalent cation, such as Mg2+ or Mn2+, for their activity and contain a highly conserved 23-residue nudix motif (GX5EX7REUXEEXGU, where U = I, L or V), which functions as a metal binding and catalytic site. Substrates of nudix h…
scaffold1_cov15216	gene_119	93926	94366	+	cd04700	5	62	5e-07	43.7	0.38	DR1025 from Deinococcus radiodurans, a member of the Nudix hydrolase superfamily, show nucleoside triphosphatase and dinucleoside polyphosphate pyrophosphatase activities. Like other enzymes belonging to this superfamily, it requires a divalent cation, in this case Mg2+, for its activity. It also contains a highly conserved 23-residue nudix motif (GX5EX7REUXEEXGU, where U = I, L or V), which func…
scaffold1_cov15216	gene_120	94403	94897	+	PF00959.18	24	148	4.4e-25	88.1	1	Phage lysozyme
scaffold1_cov15216	gene_120	94403	94897	+	cd00442	2	104	2e-25	93.9	0.92	lysozyme_like domain. This contains several members including Soluble Lytic Transglycosylases (SLT), Goose Egg-White Lysozymes (GEWL), Hen Egg-White Lysozymes (HEWL), chitinases, bacteriophage lambda lysozymes, endolysins, autolysins, and chitosanases. All the members are involved in the hydrolysis of beta-1,4- linked polysaccharides.
scaffold1_cov15216	gene_120	94403	94897	+	cd00735	2	162	3e-95	274	0.99	Bacteriophage T4-like lysozymes hydrolyse the beta-1,4-glycosidic bond between N-acetylmuramic acid (MurNAc) and N-acetylglucosamine (GlcNAc) in peptidoglycan heteropolymers of prokaryotic cell walls. Members include a variety of bacteriophages (T4, RB49, RB69, Aeh1) as well as Dictyostelium.
scaffold1_cov15216	gene_120	94403	94897	+	cd00737	11	138	3e-12	58.8	0.76	Endolysins and autolysins are found in viruses and bacteria, respectively. The ds DNA phages of eubacteria use endolysins or muralytic enzymes in conjunction with hollin, a small membrane protein, to degrade the peptidoglycan found in bacterial cell walls. Similarly, bacteria produce autolysins to facilitate the biosynthesis of its cell wall hetropolymer peptidoglycan and cell division. Both endo…
scaffold1_cov15216	gene_121	94957	95373	+	PF03013.13	1	135	2.3e-46	156.9	0.992308	Pyrimidine dimer DNA glycosylase
scaffold1_cov15216	gene_124	96391	96753	+	COG1882	61	119	5e-29	108	0.08	Pyruvate-formate lyase [Energy production and conversion].
scaffold1_cov15216	gene_124	96391	96753	+	COG3445	22	120	3e-50	156	0.78	Autonomous glycyl radical cofactor GrcA [Coenzyme transport and metabolism].
scaffold1_cov15216	gene_124	96391	96753	+	PF01228.20	60	101	1.9e-20	73.3	0.396226	Glycine radical
scaffold1_cov15216	gene_124	96391	96753	+	PRK09983	64	115	1e-10	56.4	0.07	putative formate acetyltransferase 2; Provisional
scaffold1_cov15216	gene_124	96391	96753	+	PRK11127	22	120	1e-56	173	0.78	autonomous glycyl radical cofactor GrcA; Provisional
scaffold1_cov15216	gene_124	96391	96753	+	cd01677	62	115	7e-16	71.9	0.07	Pyruvate formate lyase 2 and related enzymes. This family includes pyruvate formate lyase 2 (PFL2), B12-independent glycerol dehydratase (DhaB) and the alpha subunit of benzylsuccinate synthase (BssA), all of which have a highly conserved ten-stranded alpha/beta barrel domain, which is similar to those of PFL1 (pyruvate formate lyase 1) and RNR (ribonucleotide reductase). Pyruvate formate lyase c…
scaffold1_cov15216	gene_124	96391	96753	+	cd01678	62	116	6e-33	120	0.08	Pyruvate formate lyase 1. Pyruvate formate lyase catalyzes a key step in anaerobic glycolysis, the conversion of pyruvate and CoenzymeA to formate and acetylCoA. The PFL mechanism involves an unusual radical cleavage of pyruvate in which two cysteines and one glycine form radicals that are required for catalysis. PFL has a ten-stranded alpha/beta barrel domain that is structurally similar to thos…
scaffold1_cov15216	gene_129	98040	98585	+	PF01464.19	61	153	7.9e-06	25.4	0.726496	Transglycosylase SLT domain
scaffold1_cov15216	gene_129	98040	98585	+	cd00254	61	172	8e-05	38.2	0.92	Lytic Transglycosylase (LT) and Goose Egg White Lysozyme (GEWL) domain. Members include the soluble and insoluble membrane-bound LTs in bacteria, the LTs in bacteriophage lambda, as well as, the eukaryotic "goose-type" lysozymes (GEWL). LTs catalyze the cleavage of the beta-1,4-glycosidic bond between N-acetylmuramic acid (MurNAc) and N-acetyl-D-glucosamine (GlcNAc), as do "goose-type" lysozymes.…
scaffold1_cov15216	gene_131	98916	99383	+	COG2110	1	136	1e-15	68.1	0.74	O-acetyl-ADP-ribose deacetylase (regulator of RNase III), contains Macro domain [Translation, ribosomal structure and biogenesis].
scaffold1_cov15216	gene_131	98916	99383	+	PF01661.20	22	134	5.5e-08	32.8	0.966102	Macro domain
scaffold1_cov15216	gene_131	98916	99383	+	cd02901	1	140	8e-23	88.1	0.98	Macro domain, Poa1p_like family. The macro domain is a high-affinity ADP-ribose binding module found in a variety of proteins as a stand-alone domain or in combination with other domains like in histone macroH2A and some PARPs (poly ADP-ribose polymerases). Some macro domains recognize poly ADP-ribose as a ligand. Previously identified as displaying an Appr-1"-p (ADP-ribose-1"-monophosphate) proc…
scaffold1_cov15216	gene_131	98916	99383	+	smart00506	2	137	5e-34	113	1	Appr-1"-p processing enzyme. Function determined by Martzen et al. Extended family detected by reciprocal PSI-BLAST searches (unpublished results, and Pehrson & Fuji).
scaffold1_cov15216	gene_136	100157	100738	+	COG1435	1	191	8e-89	260	0.96	Thymidine kinase [Nucleotide transport and metabolism].
scaffold1_cov15216	gene_136	100157	100738	+	NF003300.0	1	189	3.8e-80	267.6	0.984536	PRK04296.1-5: thymidine kinase
scaffold1_cov15216	gene_136	100157	100738	+	PF00265.17	3	185	4.3e-62	209	0.99435	Thymidine kinase
scaffold1_cov15216	gene_136	100157	100738	+	PRK04296	1	190	1e-96	280	0.99	thymidine kinase; Provisional
scaffold1_cov15216	gene_147	104246	105256	+	PF10127.8	6	136	7.2e-13	48.6	0.497959	Predicted nucleotidyltransferase
scaffold1_cov15216	gene_158	112395	112658	+	COG0695	13	87	4e-08	44.2	0.83	Glutaredoxin [Posttranslational modification, protein turnover, chaperones].
scaffold1_cov15216	gene_158	112395	112658	+	PF00462.23	12	76	5.2e-08	32.9	0.9	Glutaredoxin
scaffold1_cov15216	gene_158	112395	112658	+	PRK10638	14	82	1e-07	43.3	0.7	glutaredoxin 3; Provisional
scaffold1_cov15216	gene_158	112395	112658	+	PRK11200	1	87	6e-05	35.8	0.84	glutaredoxin 1; Provisional
scaffold1_cov15216	gene_158	112395	112658	+	cd02066	14	87	1e-09	49	0.88	Glutaredoxin (GRX) family; composed of GRX, approximately 10 kDa in size, and proteins containing a GRX or GRX-like domain. GRX is a glutathione (GSH) dependent reductase, catalyzing the disulfide reduction of target proteins such as ribonucleotide reductase. It contains a redox active CXXC motif in a TRX fold and uses a similar dithiol mechanism employed by TRXs for intramolecular disulfide bond…
scaffold1_cov15216	gene_158	112395	112658	+	cd02976	14	80	2e-05	36.8	0.77	NrdH-redoxin (NrdH) family; NrdH is a small monomeric protein with a conserved redox active CXXC motif within a TRX fold, characterized by a glutaredoxin (GRX)-like sequence and TRX-like activity profile. In vitro, it displays protein disulfide reductase activity that is dependent on TRX reductase, not glutathione (GSH). It is part of the NrdHIEF operon, where NrdEF codes for class Ib ribonucleot…
scaffold1_cov15216	gene_158	112395	112658	+	cd03029	14	86	7e-06	38.3	0.85	Glutaredoxin (GRX) family, PRX5 hybrid subfamily; composed of hybrid proteins containing peroxiredoxin (PRX) and GRX domains, which is found in some pathogenic bacteria and cyanobacteria. PRXs are thiol-specific antioxidant (TSA) proteins that confer a protective antioxidant role in cells through their peroxidase activity in which hydrogen peroxide, peroxynitrate, and organic hydroperoxides are r…
scaffold1_cov15216	gene_158	112395	112658	+	cd03418	14	82	1e-10	51.4	0.79	Glutaredoxin (GRX) family, GRX bacterial class 1 and 3 (b_1_3)-like subfamily; composed of bacterial GRXs, approximately 10 kDa in size, and proteins containing a GRX or GRX-like domain. GRX is a glutathione (GSH) dependent reductase, catalyzing the disulfide reduction of target proteins such as ribonucleotide reductase. It contains a redox active CXXC motif in a TRX fold and uses a similar dithi…
scaffold1_cov15216	gene_158	112395	112658	+	cd03419	14	87	3e-05	36.4	0.77	Glutaredoxin (GRX) family, GRX human class 1 and 2 (h_1_2)-like subfamily; composed of proteins similar to human GRXs, approximately 10 kDa in size, and proteins containing a GRX or GRX-like domain. GRX is a glutathione (GSH) dependent reductase, catalyzing the disulfide reduction of target proteins such as ribonucleotide reductase. It contains a redox active CXXC motif in a TRX fold and uses a s…
scaffold1_cov15216	gene_162	113693	114166	+	PF09124.9	104	157	9.7e-33	112	1	T4 recombination endonuclease VII, dimerisation
scaffold1_cov15216	gene_163	114163	115980	+	COG1328	3	604	0	672	0.84	Anaerobic ribonucleoside-triphosphate reductase [Nucleotide transport and metabolism].
scaffold1_cov15216	gene_163	114163	115980	+	NF006732.0	2	604	1.3e-273	909.1	0.855337	PRK09263.1: anaerobic ribonucleoside-triphosphate reductase
scaffold1_cov15216	gene_163	114163	115980	+	PF13597.5	21	604	6e-168	560	1	Anaerobic ribonucleoside-triphosphate reductase
scaffold1_cov15216	gene_163	114163	115980	+	PRK07111	11	604	3e-132	406	0.78	anaerobic ribonucleoside triphosphate reductase; Provisional
scaffold1_cov15216	gene_163	114163	115980	+	PRK08270	37	488	2e-21	96.5	0.55	anaerobic ribonucleoside triphosphate reductase; Provisional
scaffold1_cov15216	gene_163	114163	115980	+	PRK08271	314	605	7e-07	50	0.4	anaerobic ribonucleoside triphosphate reductase; Provisional
scaffold1_cov15216	gene_163	114163	115980	+	PRK09263	2	604	0	1049	0.84	anaerobic ribonucleoside triphosphate reductase; Provisional
scaffold1_cov15216	gene_163	114163	115980	+	PRK14704	1	604	1e-125	385	0.95	anaerobic ribonucleoside triphosphate reductase; Provisional
scaffold1_cov15216	gene_163	114163	115980	+	TIGR02487	20	604	6.3e-170	564.4	1	NrdD: anaerobic ribonucleoside-triphosphate reductase
scaffold1_cov15216	gene_163	114163	115980	+	cd00576	51	538	2e-107	331	0.96	Ribonucleotide reductase and Pyruvate formate lyase. Ribonucleotide reductase (RNR) and pyruvate formate lyase (PFL) are believed to have diverged from a common ancestor. They have a structurally similar ten-stranded alpha-beta barrel domain that hosts the active site, and are radical enzymes. RNRs are found in all organisms and provide the only mechanism by which nucleotides are converted to deo…
scaffold1_cov15216	gene_163	114163	115980	+	cd01675	21	584	0	659	0.94	Class III ribonucleotide reductase. Ribonucleotide reductase (RNR) catalyzes the reductive synthesis of deoxyribonucleotides from their corresponding ribonucleotides. It provides the precursors necessary for DNA synthesis. RNRs are separated into three classes based on their metallocofactor usage. Class I RNRs, found in eukaryotes, bacteria, and bacteriophage, use a diiron-tyrosyl radical. Class …
scaffold1_cov15216	gene_164	115977	116609	+	PF07460.10	102	140	4e-07	30.1	1	NUMOD3 motif (2 copies)
scaffold1_cov15216	gene_164	115977	116609	+	cd00085	26	58	1e-08	47.9	0.58	HNH nucleases; HNH endonuclease signature which is found in viral, prokaryotic, and eukaryotic proteins. The alignment includes members of the large group of homing endonucleases, yeast intron 1 protein, MutS, as well as bacterial colicins, pyocins, and anaredoxins.
scaffold1_cov15216	gene_164	115977	116609	+	smart00497	157	207	2e-05	35.6	0.97	Intron encoded nuclease repeat motif. Repeat of unknown function, but possibly DNA-binding via helix-turn-helix motif (Ponting, unpublished).
scaffold1_cov15216	gene_164	115977	116609	+	smart00507	21	55	4e-09	45.9	0.68	HNH nucleases.
scaffold1_cov15216	gene_165	116599	117069	+	COG0602	1	145	4e-23	89.8	0.69	Organic radical activating enzyme [General function prediction only].
scaffold1_cov15216	gene_165	116599	117069	+	COG1180	1	75	2e-08	48.8	0.29	Pyruvate-formate lyase-activating enzyme [Posttranslational modification, protein turnover, chaperones].
scaffold1_cov15216	gene_165	116599	117069	+	PF13353.5	12	145	5.4e-48	162.7	0.992806	4Fe-4S single cluster domain
scaffold1_cov15216	gene_165	116599	117069	+	PRK11121	1	143	2e-61	188	0.93	anaerobic ribonucleotide reductase-activating protein; Provisional
scaffold1_cov15216	gene_165	116599	117069	+	PRK11145	9	72	1e-09	52.7	0.25	pyruvate formate lyase-activating enzyme 1; Provisional
scaffold1_cov15216	gene_165	116599	117069	+	TIGR02491	2	148	2.1e-64	214.1	0.993506	NrdG: anaerobic ribonucleoside-triphosphate reductase activating protein
scaffold1_cov15216	gene_179	120674	120991	+	PF10849.7	26	95	5.7e-43	144.9	1	Protein of unknown function (DUF2654)
scaffold1_cov15216	gene_181	121407	122609	+	PF11440.7	14	368	4.4e-259	858.1	1	DNA alpha-glucosyltransferase
scaffold1_cov15216	gene_182	122786	123805	+	COG0420	1	311	3e-11	61.4	0.78	DNA repair exonuclease SbcCD nuclease subunit [Replication, recombination and repair].
scaffold1_cov15216	gene_182	122786	123805	+	PF00149.27	1	165	2.7e-07	31.2	0.602941	Calcineurin-like phosphoesterase
scaffold1_cov15216	gene_182	122786	123805	+	cd00840	2	86	8e-09	52.3	0.46	Mre11 nuclease, N-terminal metallophosphatase domain. Mre11 (also known as SbcD in Escherichia coli) is a subunit of the MRX protein complex. This complex includes: Mre11, Rad50, and Xrs2/Nbs1, and plays a vital role in several nuclear processes including DNA double-strand break repair, telomere length maintenance, cell cycle checkpoint control, and meiotic recombination, in eukaryotes. During do…
scaffold1_cov15216	gene_184	124046	124252	+	PF17589.1	1	66	8.9e-40	134.7	1	Family of unknown function (DUF5487)
scaffold1_cov15216	gene_185	124291	125931	+	COG0419	18	377	4e-22	97.9	0.37	DNA repair exonuclease SbcCD ATPase subunit [Replication, recombination and repair].
scaffold1_cov15216	gene_185	124291	125931	+	COG0419	140	525	5e-09	55.9	0.4	DNA repair exonuclease SbcCD ATPase subunit [Replication, recombination and repair].
scaffold1_cov15216	gene_185	124291	125931	+	COG1196	149	524	5e-07	49.7	0.3	Chromosome segregation ATPase [Cell cycle control, cell division, chromosome partitioning].
scaffold1_cov15216	gene_185	124291	125931	+	PF13476.5	16	230	7.8e-11	42.8	0.895	AAA domain
scaffold1_cov15216	gene_185	124291	125931	+	PRK01156	18	376	6e-09	56.4	0.4	chromosome segregation protein; Provisional
scaffold1_cov15216	gene_185	124291	125931	+	PRK02224	18	376	5e-10	59.7	0.37	chromosome segregation protein; Provisional
scaffold1_cov15216	gene_185	124291	125931	+	PRK03918	19	389	6e-09	56.6	0.39	chromosome segregation protein; Provisional
scaffold1_cov15216	gene_185	124291	125931	+	cd00267	6	40	4e-05	41.8	0.23	ATP-binding cassette transporter nucleotide-binding domain. ABC transporters are a large family of proteins involved in the transport of a wide variety of different compounds, like sugars, ions, peptides, and more complex organic molecules. The nucleotide-binding domain shows the highest similarity between all members of the family. ABC transporters are a subset of nucleotide hydrolases that cont…
scaffold1_cov15216	gene_185	124291	125931	+	cd03227	7	51	8e-07	47	0.28	ATP-binding cassette domain of non-transporter proteins. ABC-type Class 2 contains systems involved in cellular processes other than transport. These families are characterized by the fact that the ABC subunit is made up of duplicated, fused ABC modules (ABC2). No known transmembrane proteins or domains are associated with these proteins.
scaffold1_cov15216	gene_185	124291	125931	+	cd03240	18	86	4e-07	48.4	0.34	ATP-binding cassette domain of Rad50. The catalytic domains of Rad50 are similar to the ATP-binding cassette of ABC transporters, but are not associated with membrane-spanning domains. The conserved ATP-binding motifs common to Rad50 and the ABC transporter family include the Walker A and Walker B motifs, the Q loop, a histidine residue in the switch region, a D-loop, and a conserved LSGG sequenc…
scaffold1_cov15216	gene_185	124291	125931	+	cd03279	7	124	7e-10	56.9	0.41	ATP-binding cassette domain of sbcCD. SbcCD and other Mre11/Rad50 (MR) complexes are implicated in the metabolism of DNA ends. They cleave ends sealed by hairpin structures and are thought to play a role in removing protein bound to DNA termini.
scaffold1_cov15216	gene_185	124291	125931	+	cd03279	452	538	2e-08	52.3	0.41	ATP-binding cassette domain of sbcCD. SbcCD and other Mre11/Rad50 (MR) complexes are implicated in the metabolism of DNA ends. They cleave ends sealed by hairpin structures and are thought to play a role in removing protein bound to DNA termini.
scaffold1_cov15216	gene_187	126185	126574	+	PF10789.8	13	122	3.6e-44	149.1	0.990741	Phage RNA polymerase binding, RpbA
scaffold1_cov15216	gene_188	126630	127316	+	PF09116.9	115	222	2e-51	172.4	1	gp45 sliding clamp, C terminal
scaffold1_cov15216	gene_189	127368	128327	+	COG0470	126	273	4e-09	53.5	0.62	DNA polymerase III, delta prime subunit [Replication, recombination and repair].
scaffold1_cov15216	gene_189	127368	128327	+	COG1222	25	194	1e-05	43.4	0.39	ATP-dependent 26S proteasome regulatory subunit [Posttranslational modification, protein turnover, chaperones].
scaffold1_cov15216	gene_189	127368	128327	+	COG2256	16	237	4e-13	66.5	0.49	Replication-associated recombination protein RarA (DNA-dependent ATPase) [Replication, recombination and repair].
scaffold1_cov15216	gene_189	127368	128327	+	COG2812	11	259	2e-08	52.8	0.44	DNA polymerase III, gamma/tau subunits [Replication, recombination and repair].
scaffold1_cov15216	gene_189	127368	128327	+	PF00004.28	47	156	5.1e-14	52.7	0.962121	ATPase family associated with various cellular activities (AAA)
scaffold1_cov15216	gene_189	127368	128327	+	PRK00440	6	218	1e-32	122	0.64	replication factor C small subunit; Reviewed
scaffold1_cov15216	gene_189	127368	128327	+	PRK04132	57	213	1e-12	66	0.18	replication factor C small subunit; Provisional
scaffold1_cov15216	gene_189	127368	128327	+	PRK04195	14	286	3e-19	85.7	0.52	replication factor C large subunit; Provisional
scaffold1_cov15216	gene_189	127368	128327	+	PRK07133	11	61	4e-06	46.3	0.08	DNA polymerase III subunits gamma and tau; Validated
scaffold1_cov15216	gene_189	127368	128327	+	PRK12402	14	313	2e-23	96.6	0.86	replication factor C small subunit 2; Reviewed
scaffold1_cov15216	gene_189	127368	128327	+	PRK13342	11	232	5e-12	64	0.5	recombination factor protein RarA; Reviewed
scaffold1_cov15216	gene_189	127368	128327	+	PRK14953	13	249	4e-11	61.4	0.47	DNA polymerase III subunits gamma and tau; Provisional
scaffold1_cov15216	gene_189	127368	128327	+	PRK14962	11	276	6e-10	57.5	0.54	DNA polymerase III subunits gamma and tau; Provisional
scaffold1_cov15216	gene_189	127368	128327	+	cd00009	30	155	8e-11	57.5	0.83	The AAA+ (ATPases Associated with a wide variety of cellular Activities) superfamily represents an ancient group of ATPases belonging to the ASCE (for additional strand, catalytic E) division of the P-loop NTPase fold. The ASCE division also includes ABC, RecA-like, VirD4-like, PilT-like, and SF1/2 helicases. Members of the AAA+ ATPases function as molecular chaperons, ATPase subunits of protease…
scaffold1_cov15216	gene_189	127368	128327	+	smart00382	44	161	3e-08	46.2	0.8	ATPases associated with a variety of cellular activities. AAA - ATPases associated with a variety of cellular activities. This profile/alignment only detects a fraction of this vast family. The poorly conserved N-terminal helix is missing from the alignment.
scaffold1_cov15216	gene_190	128329	128892	+	PF16790.4	37	173	1.3e-79	265.3	1	Bacteriophage clamp loader A subunit
scaffold1_cov15216	gene_191	128894	129262	+	PF01818.16	1	121	1.2e-75	251.2	1	Bacteriophage translational regulator
scaffold1_cov15216	gene_193	129564	132260	+	COG0417	188	768	5e-39	152	0.58	DNA polymerase elongation subunit (family B) [Replication, recombination and repair].
scaffold1_cov15216	gene_193	129564	132260	+	PF00136.20	366	768	6.9e-28	97.4	0.700431	DNA polymerase family B
scaffold1_cov15216	gene_193	129564	132260	+	PRK05761	174	428	4e-10	61.2	0.28	DNA polymerase I; Reviewed
scaffold1_cov15216	gene_193	129564	132260	+	PRK05762	188	770	2e-38	151	0.59	DNA polymerase II; Reviewed
scaffold1_cov15216	gene_193	129564	132260	+	cd00145	386	782	9e-54	189	0.89	DNA polymerase type-B family catalytic domain. DNA-directed DNA polymerases elongate DNA by adding nucleotide triphosphate (dNTP) residues to the 5'-end of the growing chain of DNA. DNA-directed DNA polymerases are multifunctional with both synthetic (polymerase) and degradative modes (exonucleases) and play roles in the processes of DNA replication, repair, and recombination. DNA-dependent DNA p…
scaffold1_cov15216	gene_193	129564	132260	+	cd05160	108	332	8e-34	128	0.98	DEDDy 3'-5' exonuclease domain of family-B DNA polymerases. The 3'-5' exonuclease domain of family-B DNA polymerases. This domain has a fundamental role in reducing polymerase errors and is involved in proofreading activity. Family-B DNA polymerases contain an N-terminal DEDDy DnaQ-like exonuclease domain in the same polypeptide chain as the polymerase domain, similar to family-A DNA polymerases.…
scaffold1_cov15216	gene_193	129564	132260	+	cd05530	386	428	6e-06	47	0.12	DNA polymerase type-B B1 subfamily catalytic domain. Archaeal proteins that are involved in DNA replication are similar to those from eukaryotes. Some archaeal members also possess multiple family B DNA polymerases (B1, B2 and B3). So far there is no specific function(s) has been assigned for different members of the archaea type B DNA polymerases. Phylogenetic analyses of eubacterial, archaeal, …
scaffold1_cov15216	gene_193	129564	132260	+	cd05531	390	500	2e-05	45.4	0.27	DNA polymerase type-B B2 subfamily catalytic domain. Archaeal proteins that are involved in DNA replication are similar to those from eukaryotes. Some archaeal members also possess multiple family B DNA polymerases (B1, B2 and B3). So far there is no specific function(s) has been assigned for different members of the archaea type B DNA polymerases. Phylogenetic analyses of eubacterial, archaeal, …
scaffold1_cov15216	gene_193	129564	132260	+	cd05532	385	667	6e-07	50.3	0.49	DNA polymerase type-B alpha subfamily catalytic domain. Three DNA-dependent DNA polymerases type B (alpha, delta, and epsilon) have been identified as essential for nuclear DNA replication in eukaryotes. DNA polymerase (Pol) alpha is almost exclusively required for the initiation of DNA replication and the priming of Okazaki fragments during elongation. In most organisms no specific repair role, …
scaffold1_cov15216	gene_193	129564	132260	+	cd05536	385	758	9e-14	71.6	0.69	DNA polymerase type-B B3 subfamily catalytic domain. Archaeal proteins that are involved in DNA replication are similar to those from eukaryotes. Some members of the archaea also possess multiple family B DNA polymerases (B1, B2 and B3). So far there is no specific function(s) has been assigned for different members of the archaea type B DNA polymerases. Phylogenetic analyses of eubacterial, arch…
scaffold1_cov15216	gene_193	129564	132260	+	cd05537	386	776	2e-15	76.9	0.72	DNA polymerase type-II subfamily catalytic domain. Bacteria contain five DNA polymerases (I, II, III, IV and V). DNA polymerase II (Pol II) is a prototype for the B-family of polymerases. The role of Pol II in a variety of cellular activities, such as repair of DNA damaged by UV irradiation or oxidation has been proven by genetic studies. DNA polymerase III is the main enzyme responsible for repl…
scaffold1_cov15216	gene_193	129564	132260	+	cd05777	186	293	1e-12	66.8	0.43	DEDDy 3'-5' exonuclease domain of eukaryotic DNA polymerase delta, a family-B DNA polymerase. The 3'-5' exonuclease domain of eukaryotic DNA polymerase delta. DNA polymerase delta is a family-B DNA polymerase with a catalytic subunit that contains a DEDDy-type DnaQ-like 3'-5' exonuclease domain. It is one of the three DNA-dependent type B DNA polymerases (alpha and epsilon are the other two) that…
scaffold1_cov15216	gene_193	129564	132260	+	cd05778	113	293	3e-05	44.1	0.71	inactive DEDDy 3'-5' exonuclease domain of eukaryotic DNA polymerase zeta, a family-B DNA polymerase. The 3'-5' exonuclease domain of eukaryotic DNA polymerase zeta. DNA polymerase zeta is a family-B DNA polymerase which is distantly related to DNA polymerase delta. It plays a major role in translesion replication and the production of either spontaneous or induced mutations. In addition, DNA pol…
scaffold1_cov15216	gene_193	129564	132260	+	cd05783	107	326	7e-12	63.9	0.87	DEDDy 3'-5' exonuclease domain of Sulfolobus solfataricus DNA polymerase B1 and similar archaeal family-B DNA polymerases. The 3'-5' exonuclease domain of Sulfolobus solfataricus DNA polymerase B1 and similar archaeal proteins. B1 is a family-B DNA polymerase. Family-B DNA polymerases contain an N-terminal DEDDy DnaQ-like exonuclease domain in the same polypeptide chain as the polymerase domain, …
scaffold1_cov15216	gene_193	129564	132260	+	cd05784	188	328	2e-11	62.2	0.69	DEDDy 3'-5' exonuclease domain of Escherichia coli DNA polymerase II and similar bacterial family-B DNA polymerases. The 3'-5' exonuclease domain of Escherichia coli DNA polymerase II (Pol II) and similar bacterial proteins. Pol II is a family-B DNA polymerase. Family-B DNA polymerases contain an N-terminal DEDDy DnaQ-like exonuclease domain in the same polypeptide chain as the polymerase domain,…
scaffold1_cov15216	gene_193	129564	132260	+	cd05785	191	331	6e-09	54.7	0.66	Uncharacterized bacterial subgroup of the DEDDy 3'-5' exonuclease domain of family-B DNA polymerases. A subfamily of the 3'-5' exonuclease domain of family-B DNA polymerases. This subfamily is composed of uncharacterized bacterial family-B DNA polymerases. Family-B DNA polymerases contain an N-terminal DEDDy DnaQ-like exonuclease domain in the same polypeptide chain as the polymerase domain, simi…
scaffold1_cov15216	gene_193	129564	132260	+	smart00486	107	627	2e-66	226	0.93	DNA polymerase type-B family. DNA polymerase alpha, delta, epsilon and zeta chain (eukaryota), DNA polymerases in archaea, DNA polymerase II in e. coli, mitochondrial DNA polymerases and and virus DNA polymerases
scaffold1_cov15216	gene_196	133079	133330	+	PF14373.5	22	63	1.3e-14	53.7	1	Superinfection immunity protein
scaffold1_cov15216	gene_197	133484	134224	+	COG0207	27	222	7e-10	55	0.68	Thymidylate synthase [Nucleotide transport and metabolism].
scaffold1_cov15216	gene_197	133484	134224	+	PF00303.18	25	226	1.2e-15	57.3	0.761194	Thymidylate synthase
scaffold1_cov15216	gene_197	133484	134224	+	PRK00956	108	222	5e-05	41.1	0.48	thymidylate synthase; Provisional
scaffold1_cov15216	gene_197	133484	134224	+	cd00351	27	222	1e-17	77.3	0.84	Thymidylate synthase and pyrimidine hydroxymethylase: Thymidylate synthase (TS) and deoxycytidylate hydroxymethylase (dCMP-HMase) are homologs that catalyze analogous alkylation of C5 of pyrimidine nucleotides. Both enzymes are involved in the biosynthesis of DNA precursors and are active as homodimers. However, they exhibit distinct pyrimidine base specificities and differ in the details of thei…
scaffold1_cov15216	gene_199	135141	136322	+	COG0468	11	282	1e-12	64.6	0.91	RecA/RadA recombinase [Replication, recombination and repair].
scaffold1_cov15216	gene_199	135141	136322	+	PF00154.20	42	268	2.1e-11	43.7	0.855513	recA bacterial DNA recombination protein
scaffold1_cov15216	gene_199	135141	136322	+	PRK09519	38	273	1e-09	57.4	0.28	DNA recombination protein RecA; Reviewed
scaffold1_cov15216	gene_199	135141	136322	+	cd00983	87	292	7e-12	63.8	0.6	RecA is a bacterial enzyme which has roles in homologous recombination, DNA repair, and the induction of the SOS response. RecA couples ATP hydrolysis to DNA strand exchange.
scaffold1_cov15216	gene_199	135141	136322	+	cd01393	43	232	4e-06	45.3	0.81	RecA is a bacterial enzyme which has roles in homologous recombination, DNA repair, and the induction of the SOS response. RecA couples ATP hydrolysis to DNA strand exchange. While prokaryotes have a single RecA protein, eukaryotes have multiple RecA homologs such as Rad51, DMC1 and Rad55/57. Archaea have the RecA-like homologs radA and radB.
scaffold1_cov15216	gene_200	136315	136659	+	PF11113.7	44	99	2.9e-26	91.2	1	Head assembly gene product
scaffold1_cov15216	gene_201	136669	138096	+	COG0305	53	382	1e-11	63.4	0.72	Replicative DNA helicase [Replication, recombination and repair].
scaffold1_cov15216	gene_201	136669	138096	+	PF03796.14	174	409	1e-16	61	0.917647	DnaB-like helicase C terminal domain
scaffold1_cov15216	gene_201	136669	138096	+	PRK06749	179	403	8e-05	42.6	0.5	replicative DNA helicase; Provisional
scaffold1_cov15216	gene_201	136669	138096	+	cd00984	179	382	3e-11	61	0.79	DnaB helicase C terminal domain. The hexameric helicase DnaB unwinds the DNA duplex at the chromosome replication fork. Although the mechanism by which DnaB both couples ATP hydrolysis to translocation along DNA and denatures the duplex is unknown, a change in the quaternary structure of the protein involving dimerization of the N-terminal domain has been observed and may occur during the enzymat…
scaffold1_cov15216	gene_201	136669	138096	+	cd01122	170	408	5e-08	52	0.84	GP4d_helicase is a homohexameric 5'-3' helicases. Helicases couple NTP hydrolysis to the unwinding of nucleic acid duplexes into their component strands.
scaffold1_cov15216	gene_206	139578	139742	+	PF07068.10	2	39	3.2e-06	26.1	0.0746562	Major capsid protein Gp23
scaffold1_cov15216	gene_207	139745	140773	+	COG0358	64	314	7e-06	44.8	0.42	DNA primase (bacterial type) [Replication, recombination and repair].
scaffold1_cov15216	gene_207	139745	140773	+	PF08275.10	177	209	0.00011	22.1	0.257812	DNA primase catalytic core, N-terminal domain
scaffold1_cov15216	gene_210	141630	142409	+	COG0338	7	257	1e-30	114	0.89	Site-specific DNA-adenine methylase [Replication, recombination and repair].
scaffold1_cov15216	gene_210	141630	142409	+	PF02086.14	7	237	4.2e-49	167.5	0.976923	D12 class N6 adenine-specific DNA methyltransferase
scaffold1_cov15216	gene_210	141630	142409	+	PRK10904	7	174	2e-16	74.4	0.62	DNA adenine methylase; Provisional
scaffold1_cov15216	gene_210	141630	142409	+	TIGR00571	1	259	3.6e-70	234.6	1	dam: DNA adenine methylase
scaffold1_cov15216	gene_211	142470	142988	+	cd11527	35	172	4e-08	46.4	1	Nucleoside Triphosphate Pyrophosphohydrolase (EC 3.6.1.8) MazG-like domain found in dimeric 2-Deoxyuridine 5'-triphosphate nucleotidohydrolase and similar proteins. dUTPase (dUTP pyrophosphatase; EC 3.6.1.23) catalyzes the hydrolysis of dUTP to dUMP and pyrophosphate. It acts to ensure chromosomal integrity by reducing the effective ratio of dUTP/dTTP. Members in this family are dimeric dUTPases,…
scaffold1_cov15216	gene_224	148265	149584	+	COG0507	32	436	5e-19	86.8	0.46	ATP-dependent exoDNAse (exonuclease V), alpha subunit, helicase superfamily I [Replication, recombination and repair].
scaffold1_cov15216	gene_224	148265	149584	+	PF13604.5	6	194	8.7e-26	90.7	0.895833	AAA domain
scaffold1_cov15216	gene_224	148265	149584	+	PRK10875	30	153	3e-08	53.4	0.18	exonuclease V subunit alpha; Provisional
scaffold1_cov15216	gene_224	148265	149584	+	PRK13709	5	153	3e-06	47.5	0.08	conjugal transfer nickase/helicase TraI; Provisional
scaffold1_cov15216	gene_224	148265	149584	+	smart00382	24	129	3e-07	43.9	0.67	ATPases associated with a variety of cellular activities. AAA - ATPases associated with a variety of cellular activities. This profile/alignment only detects a fraction of this vast family. The poorly conserved N-terminal helix is missing from the alignment.
scaffold1_cov15216	gene_224	148265	149584	+	smart00487	1	140	4e-07	44.4	0.68	DEAD-like helicases superfamily.
scaffold1_cov15216	gene_227	150086	150769	+	PF16473.4	4	164	1.1e-19	70.9	0.76506	3' exoribonuclease, RNase T-like
scaffold1_cov15216	gene_227	150086	150769	+	cd06127	5	192	4e-05	40.4	0.92	DEDDh 3'-5' exonuclease domain family. DEDDh exonucleases, part of the DnaQ-like (or DEDD) exonuclease superfamily, catalyze the excision of nucleoside monophosphates at the DNA or RNA termini in the 3'-5' direction. These proteins contain four invariant acidic residues in three conserved sequence motifs termed ExoI, ExoII and ExoIII. DEDDh exonucleases are classified as such because of the prese…
scaffold1_cov15216	gene_233	153255	153431	+	COG2331	1	53	8e-05	34.1	0.63	Predicted nucleic acid-binding protein, contains Zn-ribbon domain [General function prediction only].
scaffold1_cov15216	gene_233	153255	153431	+	PF09723.9	1	40	3.3e-12	46.2	0.925	Zinc ribbon domain
scaffold1_cov15216	gene_233	153255	153431	+	TIGR02605	1	45	2.4e-12	44.7	0.846154	CxxC_CxxC_SSSS: putative regulatory protein, FmdB family
scaffold1_cov15216	gene_233	153255	153431	+	smart00834	1	43	9e-13	52.2	1	Putative regulatory protein. CxxC_CXXC_SSSS represents a region of about 41 amino acids found in a number of small proteins in a wide range of bacteria. The region usually begins with the initiator Met and contains two CxxC motifs separated by 17 amino acids. One protein in this entry has been noted as a putative regulatory protein, designated FmdB. Most proteins in this entry have a C-terminal r…
scaffold1_cov15216	gene_236	154141	155958	+	COG0187	6	603	3e-94	303	0.87	DNA gyrase/topoisomerase IV, subunit B [Replication, recombination and repair].
scaffold1_cov15216	gene_236	154141	155958	+	COG1389	47	241	1e-05	45.1	0.32	DNA topoisomerase VI, subunit B [Replication, recombination and repair].
scaffold1_cov15216	gene_236	154141	155958	+	PF02518.25	46	188	7.4e-14	52.2	0.945946	Histidine kinase-, DNA gyrase B-, and HSP90-like ATPase
scaffold1_cov15216	gene_236	154141	155958	+	PRK05559	6	603	6e-79	263	0.85	DNA topoisomerase IV subunit B; Reviewed
scaffold1_cov15216	gene_236	154141	155958	+	PRK05644	4	601	3e-53	192	0.8	DNA gyrase subunit B; Validated
scaffold1_cov15216	gene_236	154141	155958	+	PRK14939	6	532	3e-39	151	0.59	DNA gyrase subunit B; Provisional
scaffold1_cov15216	gene_236	154141	155958	+	cd00075	48	185	2e-07	48.4	0.95	Histidine kinase-like ATPases; This family includes several ATP-binding proteins for example: histidine kinase, DNA gyrase B, topoisomerases, heat shock protein HSP90, phytochrome-like ATPases and DNA mismatch repair proteins
[truncated: 20 more rows]

## Sheet: HP3.1_Domain
Contig	Feature	Feature Start in Contig	Feature End in Contig	Feature Direction in Contig	Domain Accession	Domain Start in Feature	Domain End in Feature	E-value	Bit Score	Domain Coverage	Domain Description
[truncated: 353 more rows]
